# Supplementary material for: First-in-class small molecule potentiators of cancer virotherapy
Source: PubMed Central journal article supplement (PMC4880900; doi:10.1038/srep26786), 2016-05-26
Supplement: srep26786-s1.pdf [file srep26786-s1.pdf]

## SUPPLEMENTARY INFORMATION

### First-in-class small molecule potentiators of cancer virotherapy

Mark H. Dornan,<sup>1,5</sup> Ramya Krishnan,<sup>2,3,5</sup> Andrew M. Macklin,<sup>4,5</sup> Mohammed Selman,<sup>2,3</sup> Nader El Sayes,<sup>2,3</sup> Hwan Hee Son,<sup>2,3</sup> Colin Davis,<sup>2,3</sup> Andrew Chen,<sup>2</sup> Kerkeslin Keillor,<sup>1</sup> Penny Le,<sup>1</sup> Christina Moi,<sup>1</sup> Paula Ou,<sup>2,3</sup> Christophe Pardin,<sup>1</sup> Carlos R. Canez,<sup>4</sup> Fabrice Le Boeuf,<sup>2</sup> John C. Bell,<sup>2,3</sup> Jeffrey C. Smith,<sup>\*4</sup> Jean-Simon Diallo,<sup>\*2,3</sup> Christopher N. Boddy <sup>\*1</sup>

<sup>1</sup> Departments of Chemistry and Biomolecular Sciences, University of Ottawa, Ottawa, Ontario, Canada

<sup>2</sup> Centre for Innovative Cancer Research, Ottawa Hospital Research Institute, Ottawa, Ontario, Canada

<sup>3</sup> Department of Biochemistry, Microbiology and Immunology, University of Ottawa, Ontario, Canada

<sup>4</sup> Department of Chemistry and Institute of Biochemistry, Carleton University, Ottawa, Ontario, Canada

<sup>5</sup> These authors contributed equally to this work

\* email: jeff.smith@carleton.ca; jsdiallo@ohri.ca; cboddy@uottawa.ca

### Table of Contents

|                                                                                                                                         |    |
|-----------------------------------------------------------------------------------------------------------------------------------------|----|
| Supplementary Figures .....                                                                                                             | 2  |
| Figure S1 Analogs of 1 enhance oncolytic VSV spread in murine melanoma cells.....                                                       | 3  |
| Figure S2 Analogs of 1 enhance oncolytic VSV spread in murine colon cancer cells .....                                                  | 4  |
| Figure S3 Analogs of 1 enhance oncolytic VSV activity in murine breast cancer cells.....                                                | 5  |
| Figure S4 Analogs of 1 enhance oncolytic HSV-1 spread in human renal carcinoma cells.....                                               | 6  |
| Figure S5 1 and Pyrrole-based analog 10 enhance transduction of non-replicating gene therapy vectors in human lung carcinoma cells..... | 7  |
| Figure S6 VSV Titers for all concentrations tested in <i>ex vivo</i> experiment .....                                                   | 8  |
| Figure S7 Compound 10 enhances VSVΔ51 oncolytic activity in a resistant syngeneic tumor model                                           | 9  |
| Figure S8 Compound 1 and analogs inhibit the production of IFN $\beta$ and interferon-stimulated genes ..                               | 10 |
| Figure S9 Interferon-induced antiviral response is overcome by 1 and its analogs.                                                       | 11 |
| Figure S10 Compound 10 and 24 can be detected in the tumor following intratumoral injection .....                                       | 12 |
| Figure S11. Compounds 28 can be detected in the tumor and serum following intratumoral injection.                                       | 13 |
| Supplemental Table S1: Analog activity, toxicity and stability .....                                                                    | 14 |
| Synthetic methods and characterization.....                                                                                             | 20 |
| Spectra and titers: <sup>1</sup> H NMR, <sup>13</sup> C NMR, MRM transitions, VEU titer .....                                           | 35 |
| MRM Transition Data .....                                                                                                               | 87 |
| References .....                                                                                                                        | 89 |

## **Supplementary Figures**

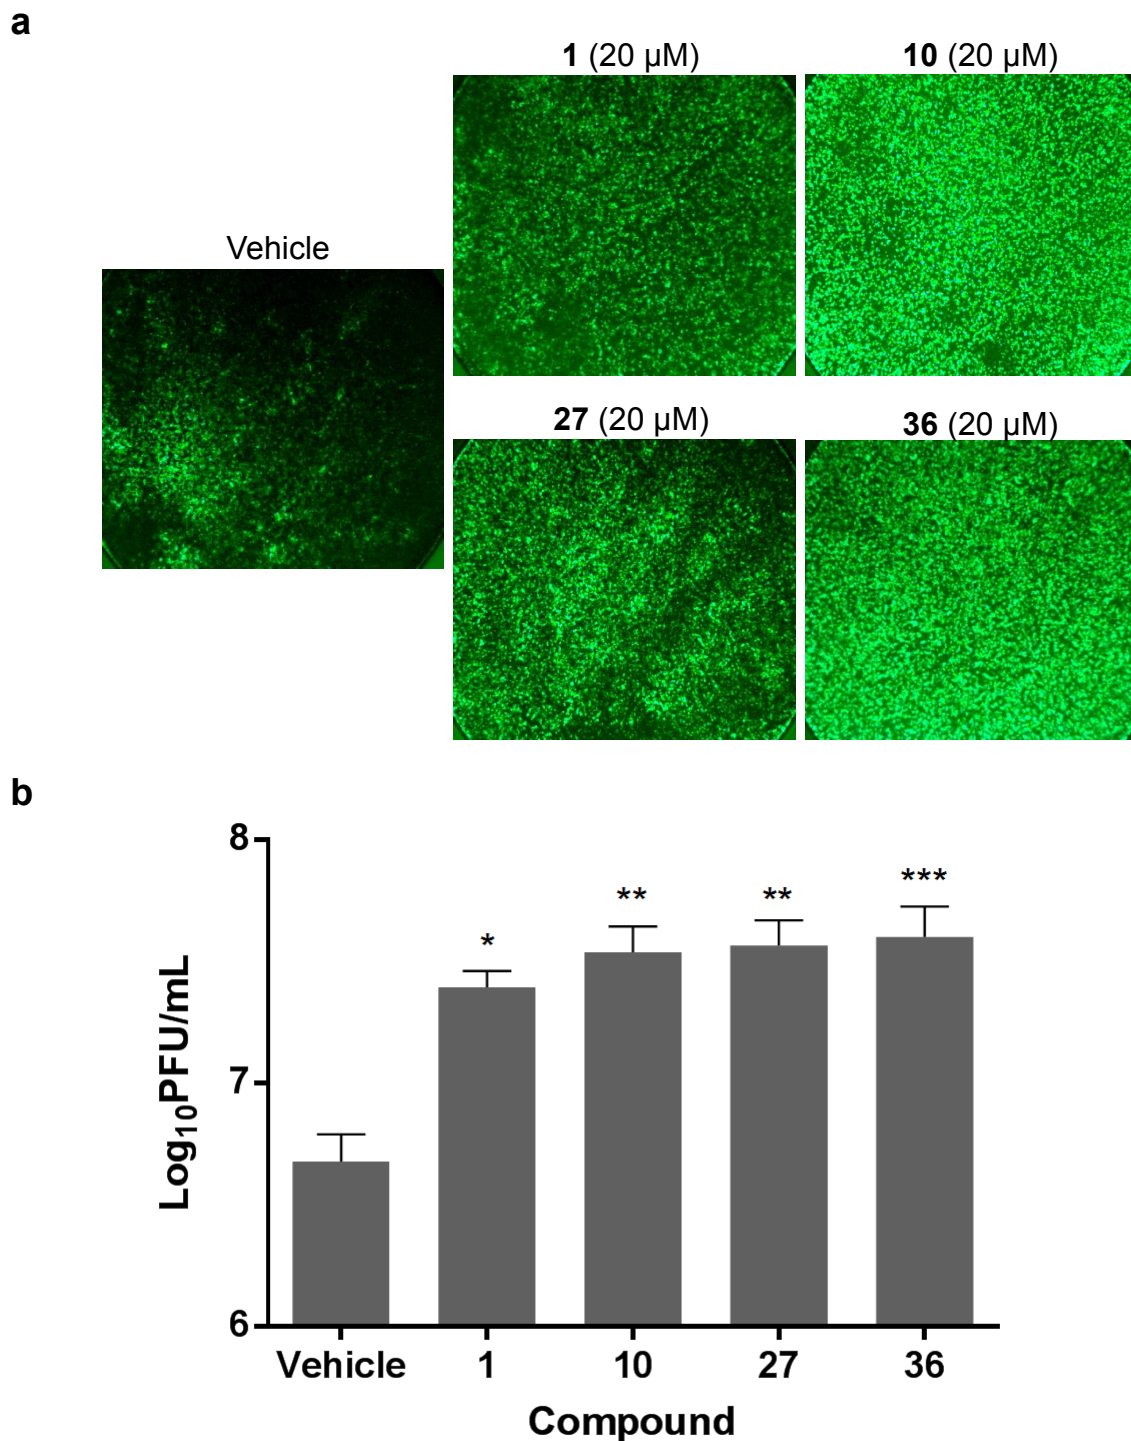

**Supplementary Figure S1. Analogs of 1 enhance oncolytic VSV spread in murine melanoma cells.** Murine melanoma (B16F10-LacZ) cells were treated with vehicle, **1**, **10**, **27**, or **36** for 4h at the specified concentrations. 4 hours later, cells were infected with VSVΔ51-GFP at MOI 0.001. (A) Virus replication was assessed by fluorescence microscopy 24 hours post-infection. (B) Samples were titered 48 hours post-infection. \* $p = 0.0392$ , \*\* $p = 0.0027$  for 10 vs vehicle and 0.0015 for 27 vs vehicle, \*\*\* $p = 0.0007$  for 36 vs vehicle (one-way ANOVA with Dunnett's multiple comparisons test), Error bars represent standard error.

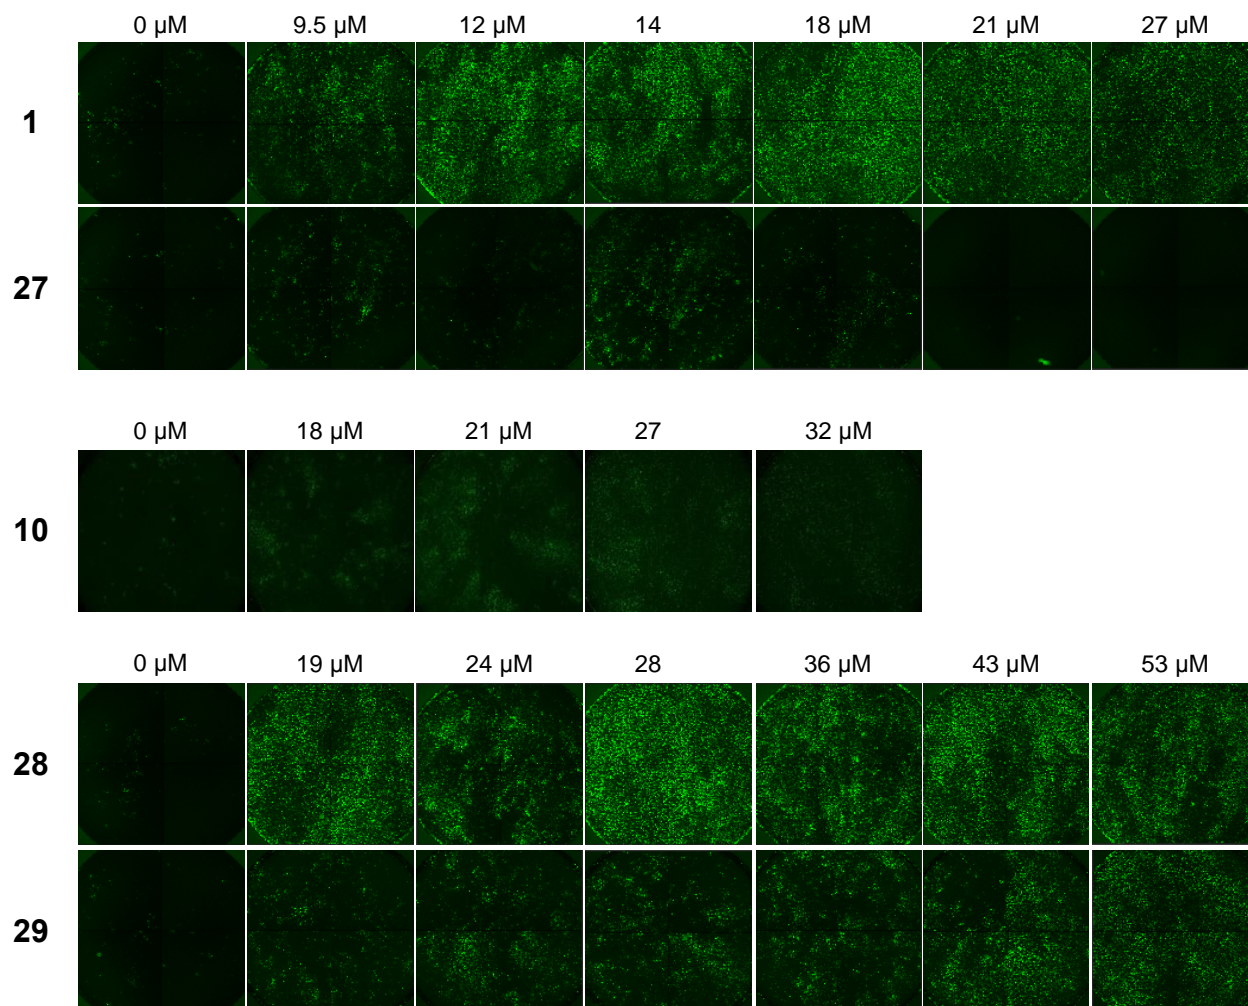

**Supplementary Figure S2. Analogs of 1 enhance oncolytic VSV spread in murine colon cancer cells.** Murine colon carcinoma (CT26-WT) cells were treated with vehicle, **1**, **10**, **27**, **28**, or **29** for 4h at the specified concentrations. 4 hours later, cells were infected with VSV $\Delta$ 51-GFP at MOI 0.005. Virus replication was assessed by fluorescence microscopy 24 hours post-infection.

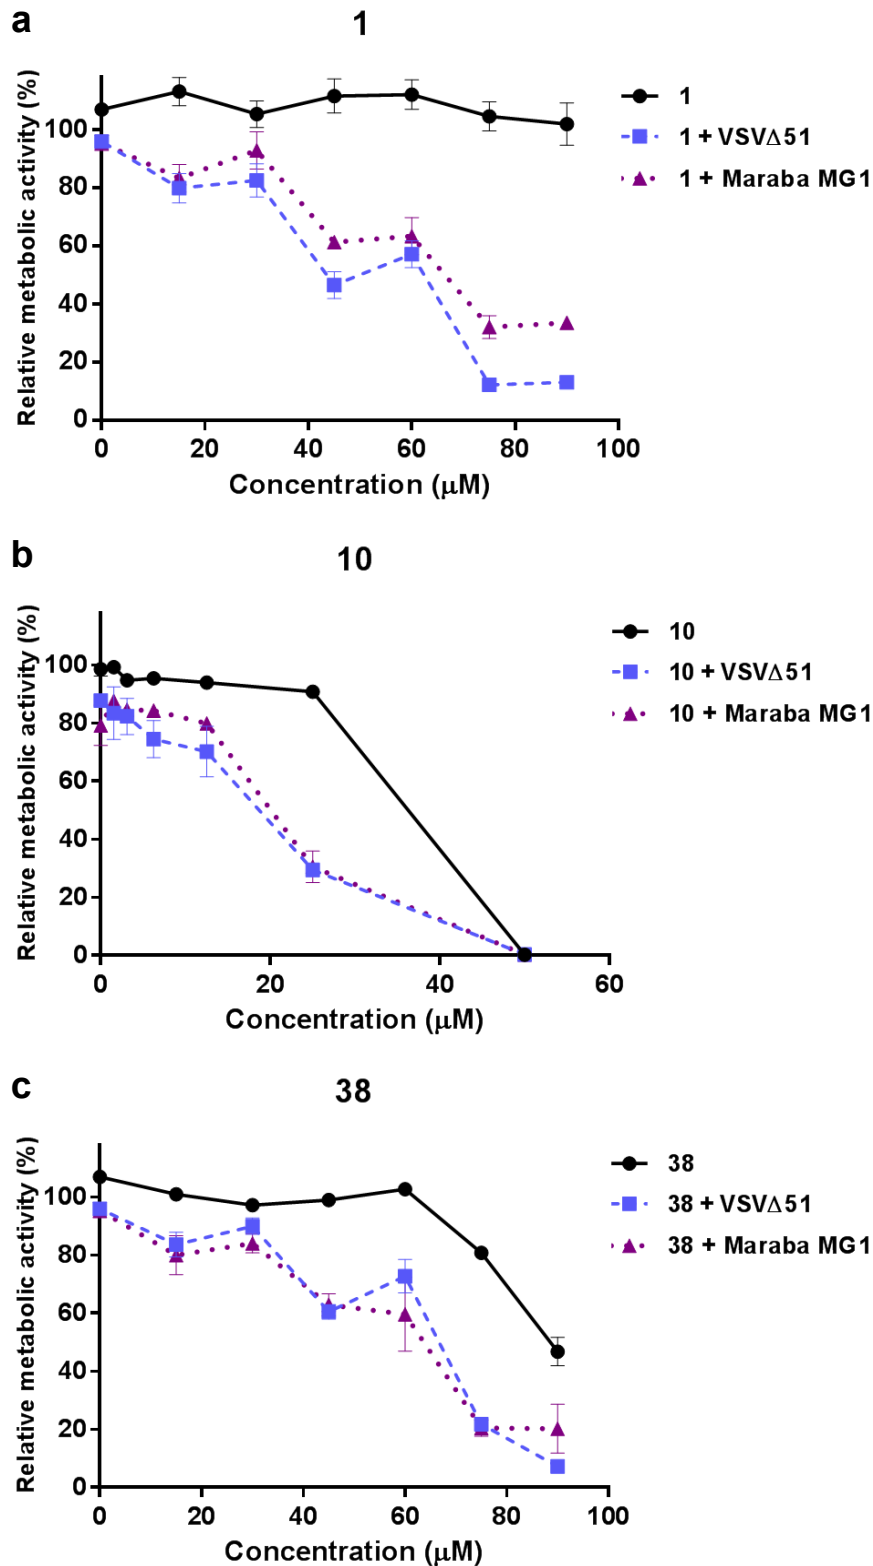

**Supplementary Figure S3. Analogs of 1 enhance oncolytic VSV activity in murine breast cancer cells.** Murine mammary carcinoma (4T1) cells were treated with vehicle, (A) **1**, (B) **10**, or (C) **38** for 4h at the specified concentrations. 4 hours later, cells were infected with VSV $\Delta$ 51 or Maraba MG1 at MOI 0.005. 40 hours post-infection, cytotoxicity was assessed by incubating samples with alamarBlue® for 2 h at 37°C before measuring fluorescence (530nm excitation, 590 nm emission). Values were normalized to that of untreated controls.

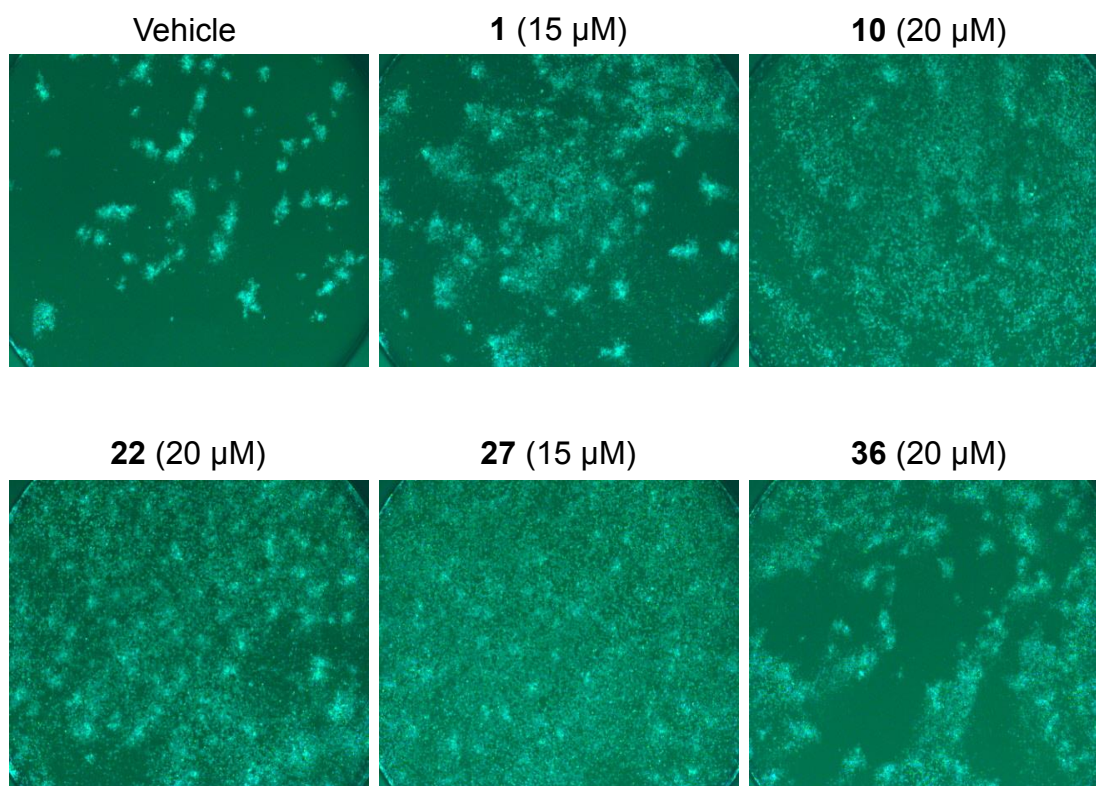

**Supplementary Figure S4. Analogs of 1 enhance oncolytic HSV-1 spread in human renal carcinoma cells.** Human renal carcinoma (786-0) cells were treated with vehicle, **1**, **10**, **22**, **27**, or **36** for 4h at the specified concentrations. 4 hours later, cells were infected with ICP0-null HSV-N212eGFP at MOI 0.005. eGFP fluorescence was detected 48h after HSV infection.

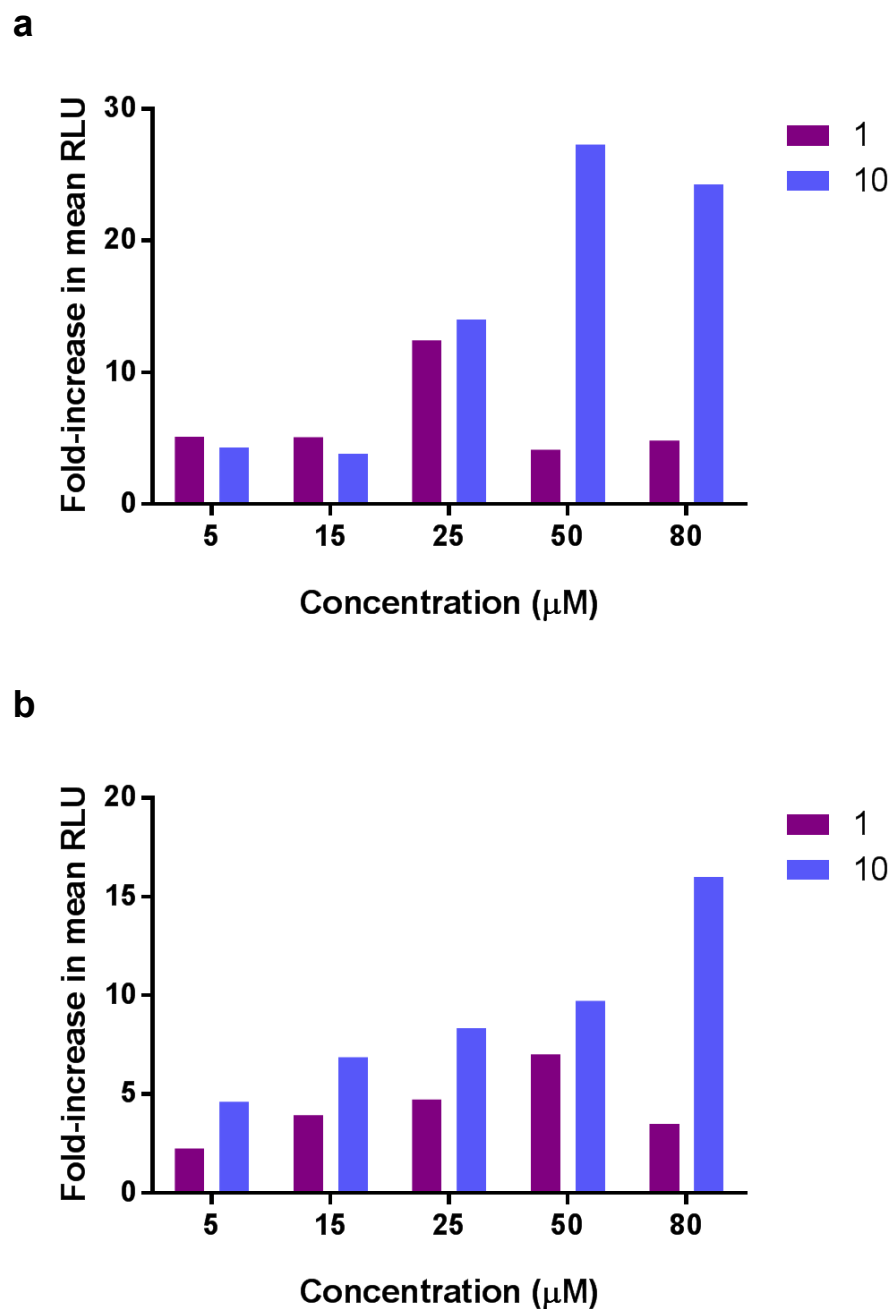

**Supplementary Figure S5. 1 and Pyrrole-based analog 10 enhance transduction of non-replicating gene therapy vectors in human lung carcinoma cells.** Human lung carcinoma (A549) cells were treated with **1** or **10** analogs at various concentrations. 4 hours later, cells were infected with A) replication defective adeno-associated virus expressing firefly luciferase (AAV2-luc) or B) replication defective adenovirus expressing firefly luciferase (Ad5-luc) at an MOI of 1. 24 hours later, luciferase activity was measured. Data is represented as the fold increase in mean relative light units of treated samples versus untreated controls

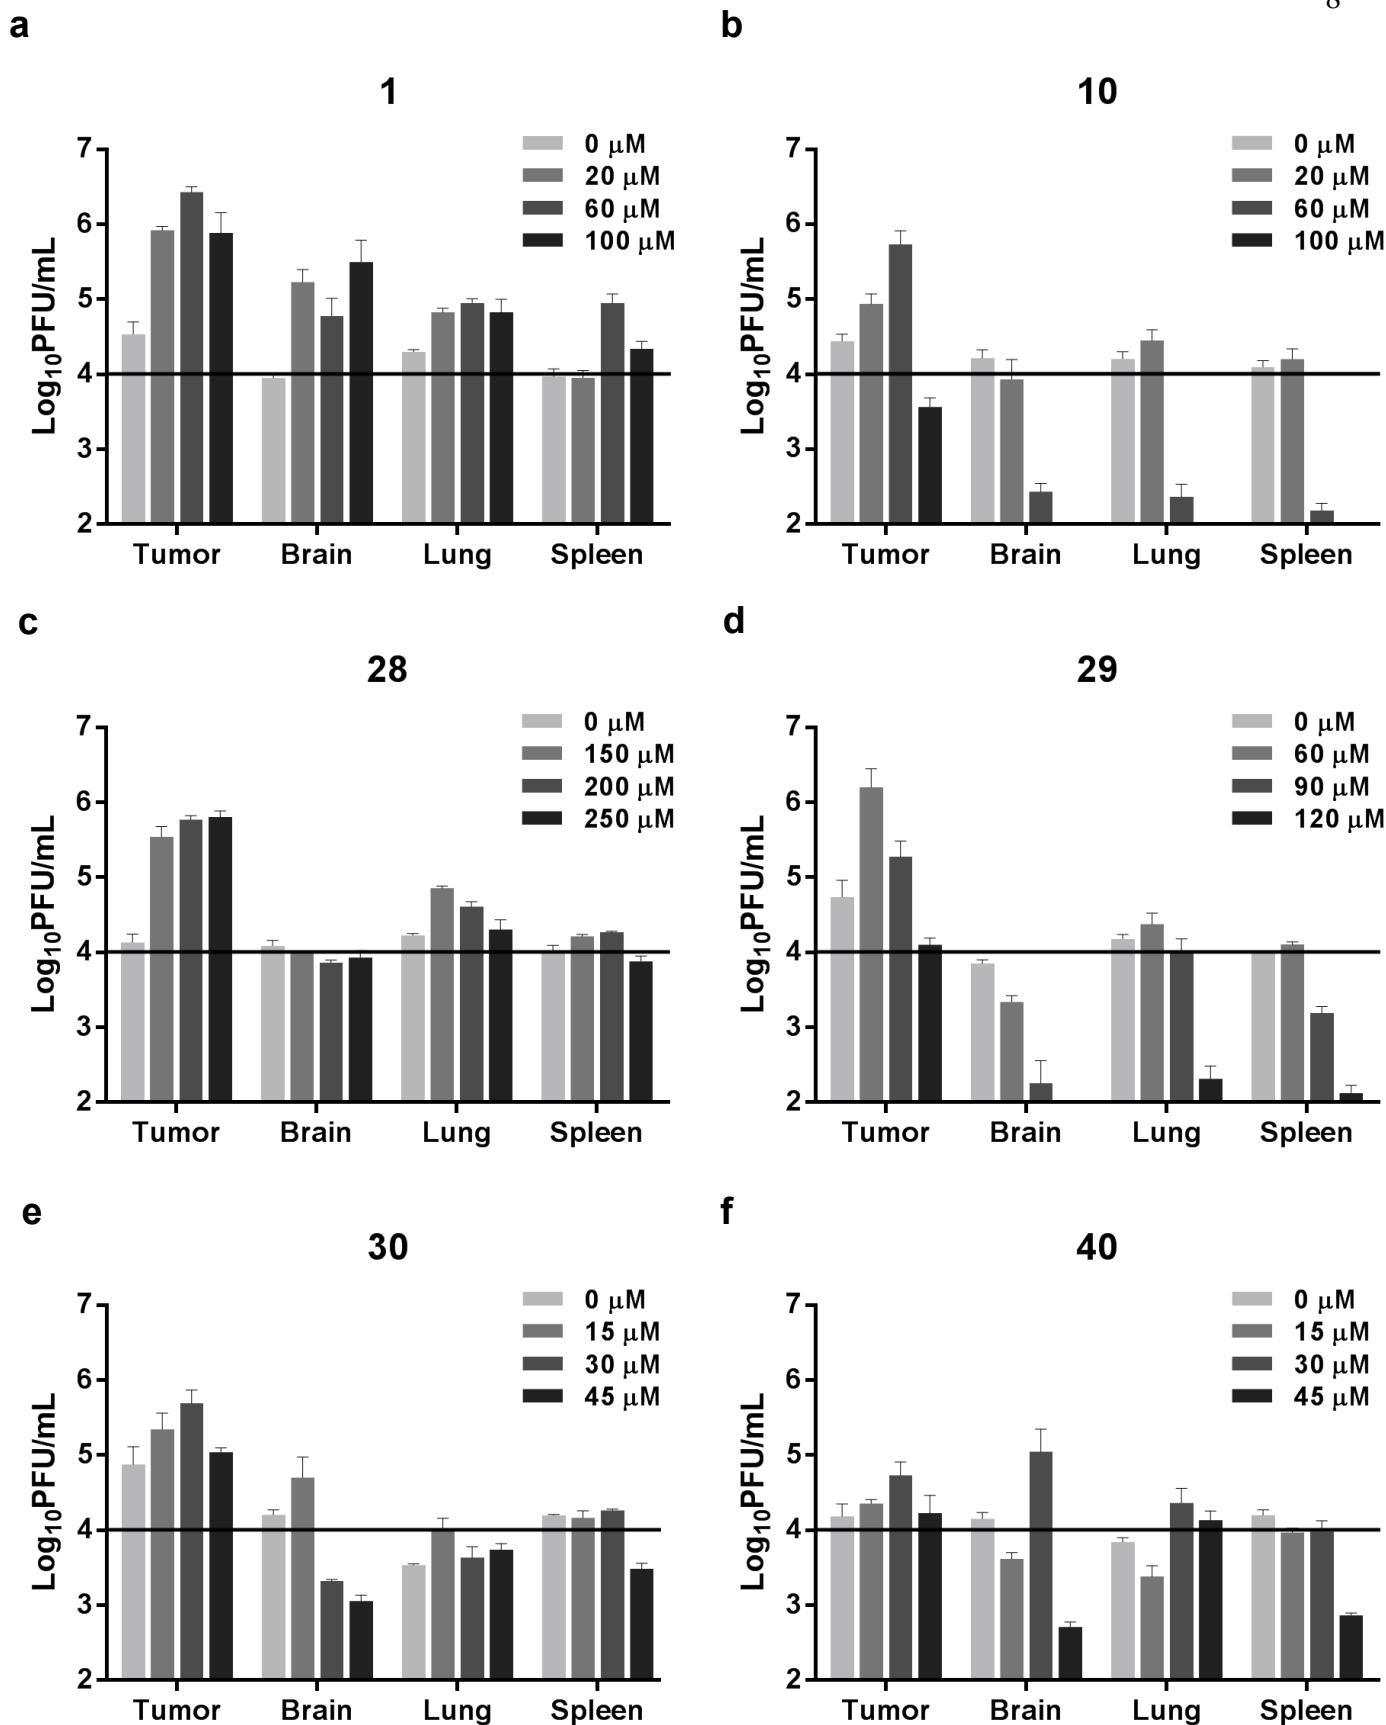

**Supplementary Figure S6. VSV Titers for all concentrations tested in *ex vivo* experiment.** Increasing doses of 1 and its analogs were tested as described in Figure 3, which depicts the most effective concentration in tumor tissues for each analog. See Methods section for more information.



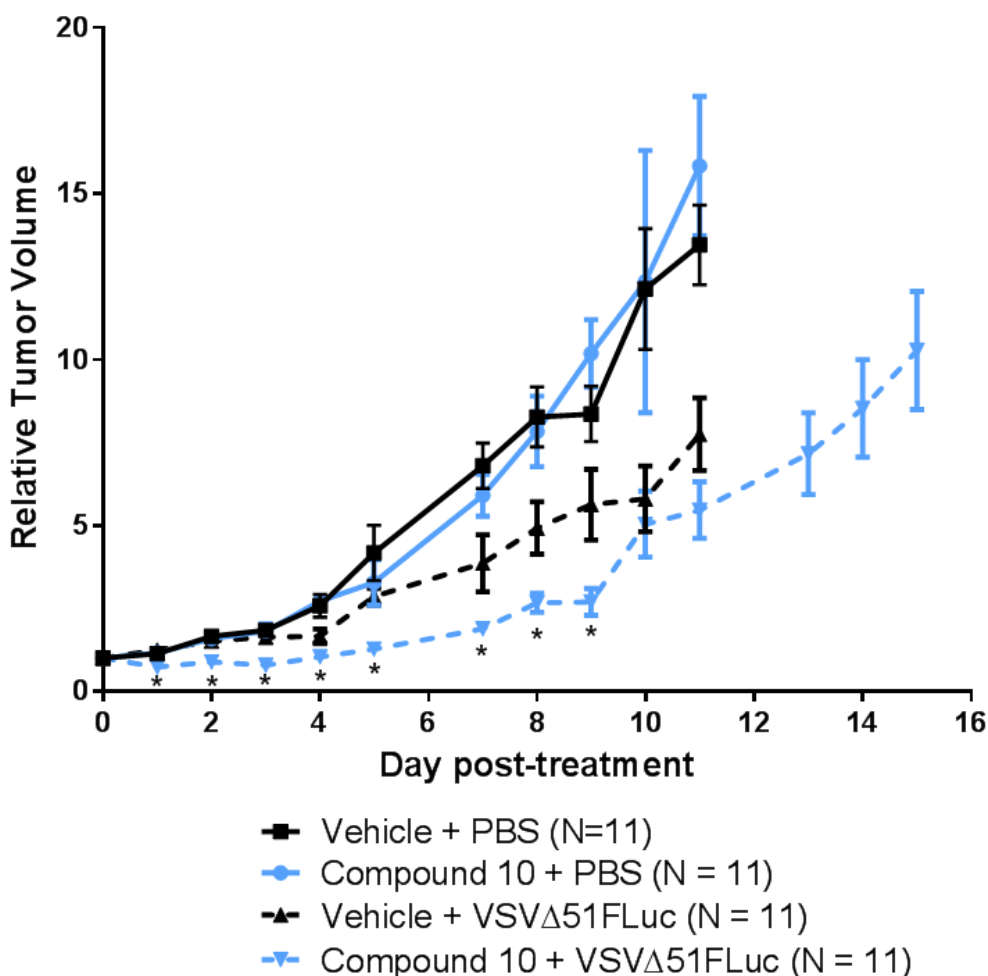

**Supplementary Figure S7. Compound 10 enhances VSVΔ51 oncolytic activity in a resistant syngeneic tumor model.** VSVΔ51-resistant CT26 cells were subcutaneously engrafted into female Balb/c mice. After 11 days, mice were given 50 μL of vehicle (DMSO), or 50 mg/kg of **10** by intraperitoneal injection. Four hours later, mice were treated with  $1 \times 10^8$  plaque-forming units of VSVΔ51-Fluc by intratumoral injection. Vehicle or or **10** was readministered on day 2 and 4 post-initial treatment. Pooled results from two separate experiments are shown. Average tumor volumes for each treatment group are shown and error bars correspond to standard error. Tumor volume curves are terminated when the first mouse in each group is euthanized. Average tumor volumes of vehicle + VSVΔ51-Fluc and **10** + VSVΔ51-Fluc treated groups were compared with a Student's t-test for each day. \* P < 0.05.

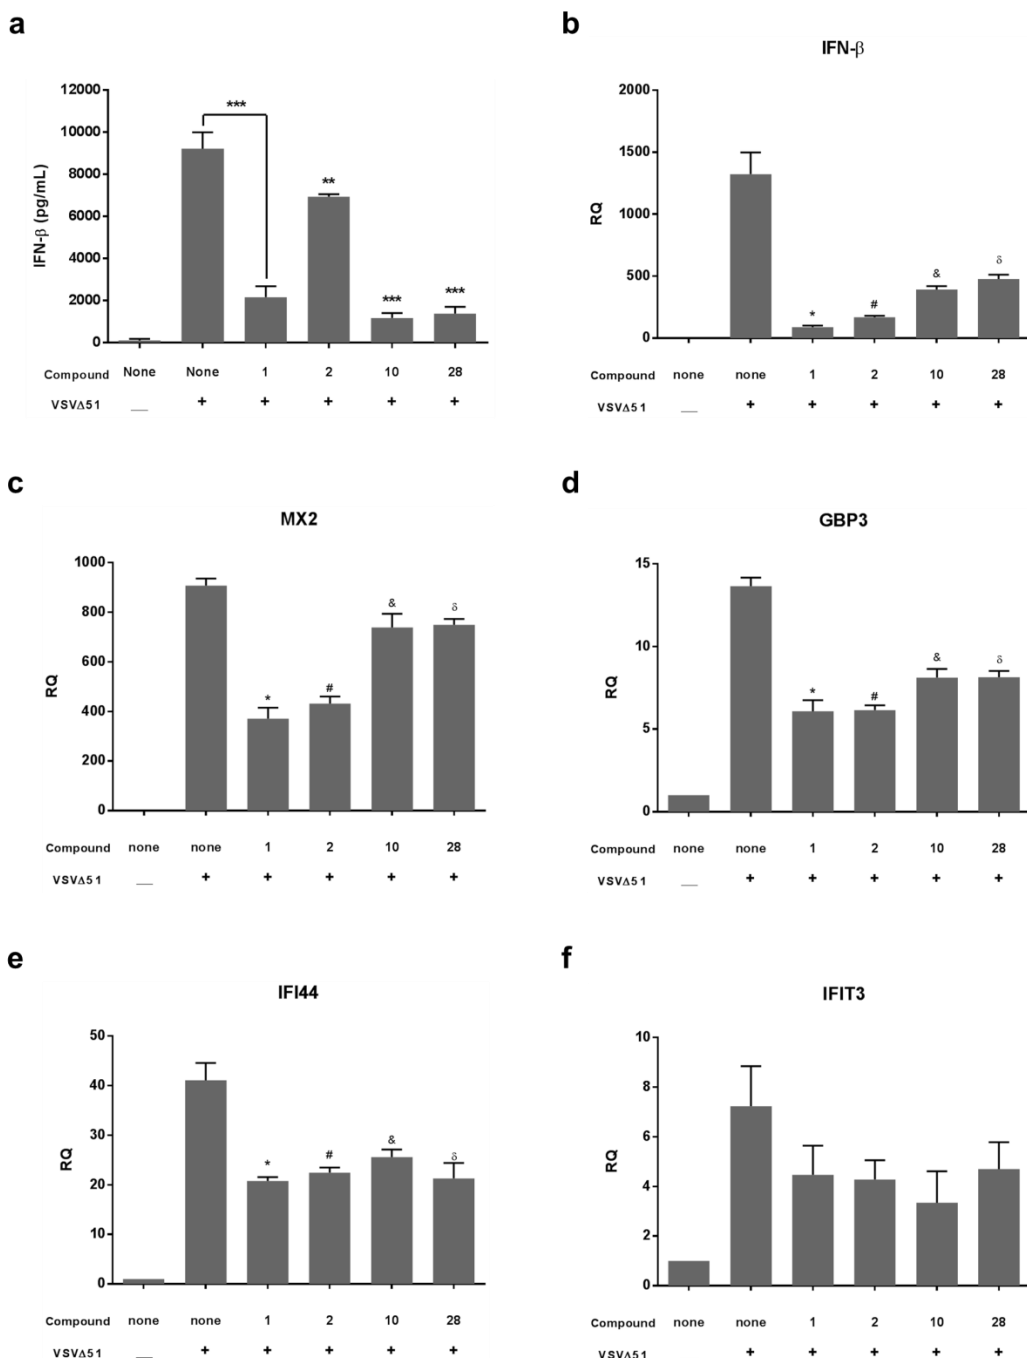

**Supplementary Figure S8. Compound 1 and its analogs inhibit the production of IFN $\beta$  and interferon-stimulated genes (ISGs).** (a) 786-0 cells were pre-treated with compounds 1, 2, 10 and 28 before infection with VSV $\Delta$ 51-GFP for 16 hours. Amount of IFN $\beta$  in the supernatant was measured by sandwich ELISA. \*\*\* P < 0.0001, \*\*P = 0.0091 (One-Way ANOVA), n=3 (biological replicates). (b-f) Quantitative RT-PCR for IFN $\beta$  and ISG expression in 786-0 cells pre-treated with 1, 2, 10 and 28 before infection with VSV $\Delta$ 51-GFP for 16 hours. (A/IFN $\beta$ ) \* P < 0.0001, # P < 0.0001, & P < 0.0001, □ P < 0.0001. (B/MX2) \* P < 0.0001, # P < 0.0001, & P < 0.0195, □ P < 0.0290. (C/GBP3) \* P < 0.0001, # P < 0.0001, & P < 0.0001, □ P < 0.0001. (D/IFI44) \* P < 0.0001, # P < 0.0001, & P < 0.0001, □ P = 0.0003 (One-Way ANOVA), n=3 (biological duplicates were pooled and the RT-PCR was done in triplicate). This experiment was performed twice with similar results. Representative results from one experiment are shown.

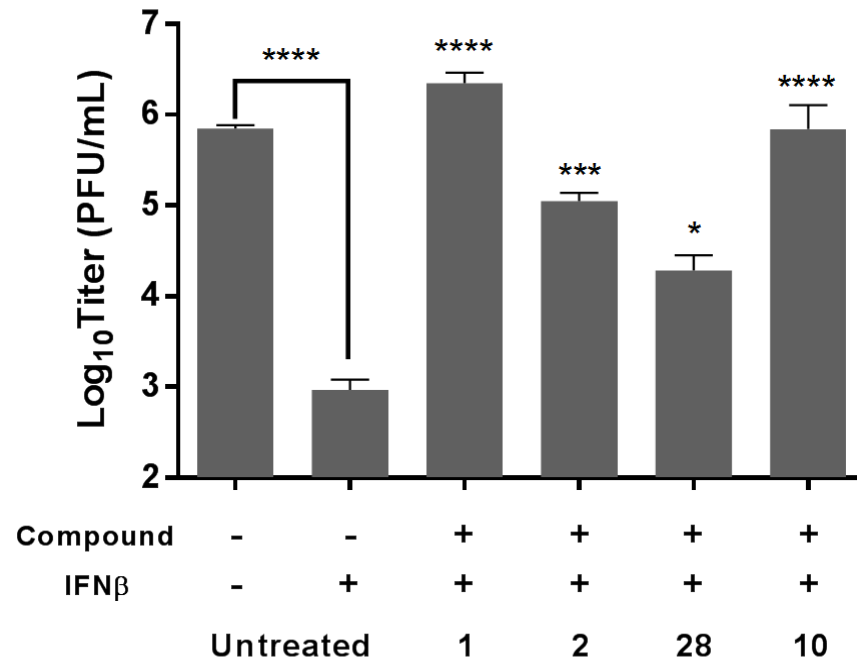

**Supplementary Figure S9. Interferon-induced antiviral response is overcome by 1 and its analogs.** Human renal carcinoma (786-0) cells were co-treated with compound and IFN $\beta$  for 4 hours and then challenged with VSV $\Delta$ 51-GFP at MOI 0.01. Samples were titered 48 post-infection. \*p = 0.0109, \*\*\*p = 0.001, \*\*\*\*p = <0.0001 (one-way ANOVA with Dunnett's multiple comparisons test), Error bars represent standard error.

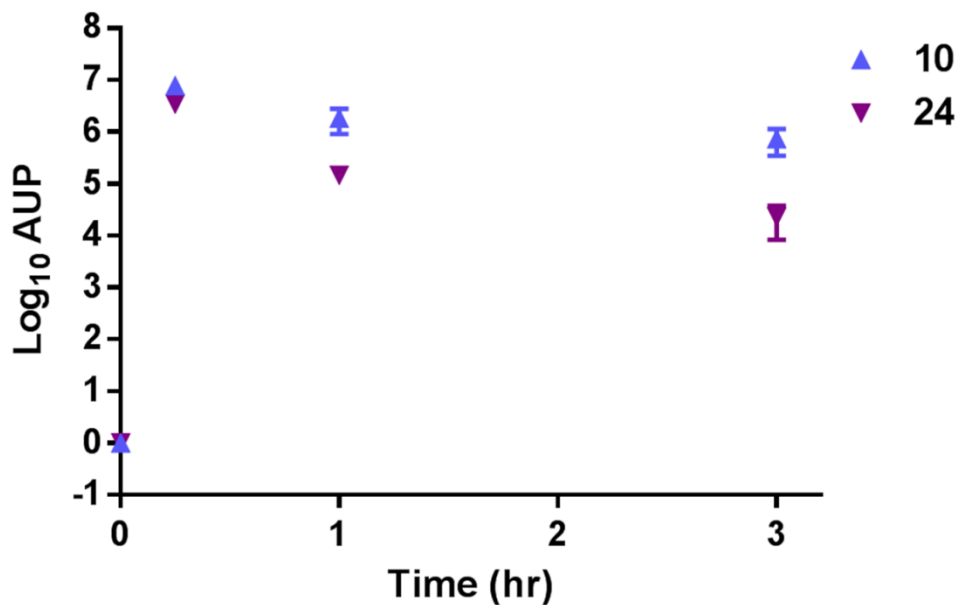

**Supplementary Figure S10. Compounds 10, and 24 can be detected in the tumor following intratumoral injection.** Mice (N = 1 per timepoint) bearing subcutaneous CT26 tumors were injected intratumorally with 50 mg/kg of 10 or 24. Tumors were excised at various times post-injection and analysed for the presence of compound by LC-MRM. Area under the peak (AUP) for the parent compound(s) are shown. Error bars represent the standard deviation of 3 technical replicates.

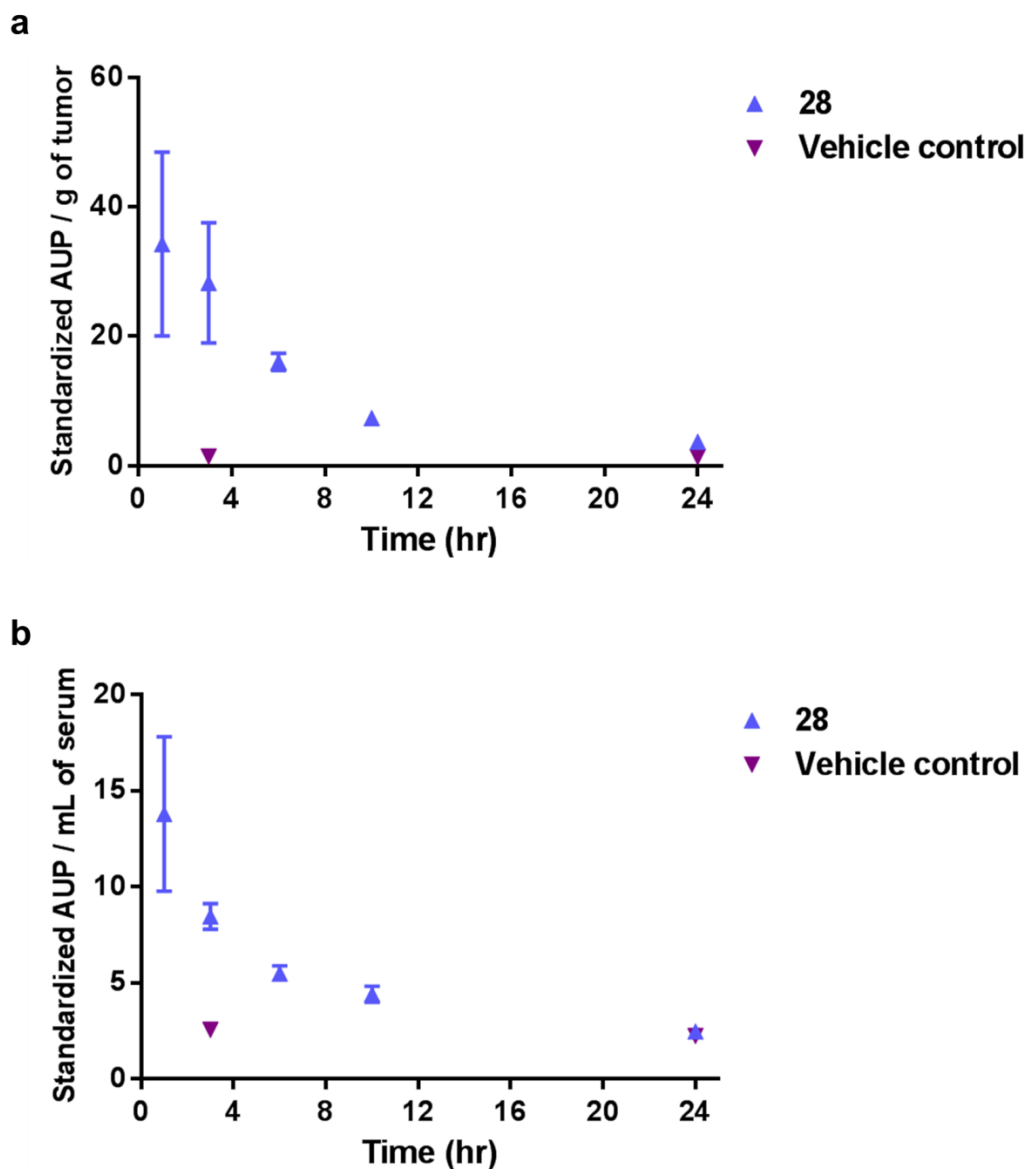

**Supplementary Figure S11. Compounds 28 can be detected in the tumor and serum following intratumoral injection.** Mice bearing subcutaneous CT26 tumors were injected intratumorally with 40 mg/kg of 28 (N = 3 per timepoint) or vehicle control (N = 1 for 3h and 24h timepoints). (a) Tumors and were excised and (b) serum was collected at various times post-injection and analysed for the presence of compound by LC-MRM. Standardized area under the peak (AUP) for the parent compound are shown. Error bars represent the standard error for 3 biological replicates.

**Supplementary Table S1. Analog activity, toxicity and stability.**

| ID | Structure                                                                           | Peak fold enhancement <sup>a</sup> | PFE dose ( $\mu\text{M}$ ) <sup>b</sup> | LD <sub>50</sub> ( $\mu\text{M}$ ) | LD <sub>50</sub> with virus ( $\mu\text{M}$ ) | GSH half-life (min.) | Plasma stability at 3 hours (% remaining) |
|----|-------------------------------------------------------------------------------------|------------------------------------|-----------------------------------------|------------------------------------|-----------------------------------------------|----------------------|-------------------------------------------|
| 1  | 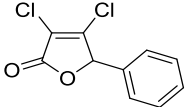   | 1910                               | 60                                      | 79                                 | 16                                            | < 5                  | 0                                         |
| 2  |    | 705                                | 72                                      | 87                                 | 50                                            | < 5                  | 0                                         |
| 3  |    | 365                                | 96                                      | 140                                | 140                                           | NR <sup>c</sup>      | 65.6<br>$\pm$ 6.5                         |
| 4  |    | 345                                | 80                                      | 90                                 | 90                                            | NR                   | 0                                         |
| 5  |   | 515                                | 36                                      | 41                                 | 27                                            | < 5                  | 0                                         |
| 6  |  | 400                                | 60                                      | 73                                 | 51                                            | < 5                  | 0                                         |
| 7  |  | 575                                | 60                                      | 52                                 | 17                                            | < 5                  | 0                                         |
| 8  |  | NE <sup>d</sup>                    | -                                       | >180                               | >180                                          | NR                   | 88.3<br>$\pm$ 9.3                         |
| 9  |  | 1280                               | 120                                     | 148                                | 87                                            | 117                  | 0                                         |
| 10 |  | 555                                | 48                                      | 67                                 | 51                                            | 32                   | 19.8<br>$\pm$ 0.4                         |
| 11 |  | 55                                 | 240                                     | 332                                | 332                                           | 64                   | 42.5<br>$\pm$ 9.6                         |

|    |                                                                                     |     |     |       |       |     |                 |
|----|-------------------------------------------------------------------------------------|-----|-----|-------|-------|-----|-----------------|
| 12 | 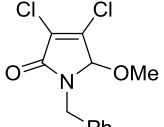   | 535 | 180 | 206   | 203   | 118 | 47.6<br>± 1.4   |
| 13 |    | 305 | 60  | 61    | 45    | 21  | 0               |
| 14 |    | 75  | 96  | 91    | 85    | < 5 | 70.2<br>± 8.4   |
| 15 |    | NE  | -   | 66    | 66    | 340 | 14.9<br>± 7.1   |
| 16 |    | NE  | -   | > 360 | > 360 | NR  | 98.2<br>± 3.7   |
| 17 |   | NE  | -   | > 360 | > 360 | NR  | 82.0<br>± 10.2  |
| 18 |  | 475 | 60  | 67    | 28    | 45  | 54.1<br>± 5.1   |
| 19 |  | 975 | 60  | 64    | 27    | 40  | 50.1 ±<br>10.5  |
| 20 |  | NE  | -   | >360  | >360  | NR  | 102.9<br>± 1.6  |
| 21 |  | 55  | 504 | 630   | 567   | NR  | 102.7<br>± 10.8 |

|    |                                                                                     |      |     |     |    |    |               |
|----|-------------------------------------------------------------------------------------|------|-----|-----|----|----|---------------|
| 22 | 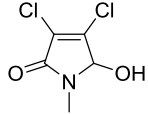   | 895  | 96  | 119 | 76 | 68 | 72.0<br>± 3.0 |
| 23 |    | 1105 | 120 | 171 | 89 | -  | ND            |
| 24 |    | 915  | 120 | 174 | 96 | 61 | 91.6<br>± 5.2 |
| 25 |    | 1415 | 80  | 127 | 51 | 53 | 54.8<br>± 3.6 |
| 26 |    | 995  | 96  | 110 | 66 | 46 | 64.8<br>± 7.7 |
| 27 |    | 40   | 48  | 100 | 87 | 21 | 9.0<br>± 1.4  |
| 28 |   | 1910 | 80  | 153 | 55 | 96 | 38.9<br>± 5.2 |
| 29 |  | 975  | 72  | 74  | 27 | 74 | 57.6<br>± 6.6 |
| 30 |  | 1090 | 32  | 36  | 20 | 50 | 42.9<br>± 7.2 |



|    |                                                                                     |      |     |     |     |    |                 |
|----|-------------------------------------------------------------------------------------|------|-----|-----|-----|----|-----------------|
| 31 | 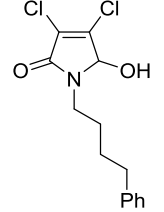   | 495  | 40  | 40  | 34  | 72 | 40.1<br>± 9.8   |
| 32 |    | 210  | 27  | 28  | 5   | 24 | ND <sup>e</sup> |
| 33 |    | 575  | 18  | 18  | 12  | 24 | 0               |
| 34 |    | 630  | 72  | 74  | 6   | 31 | 48.0<br>± 16.5  |
| 35 |   | 265  | 27  | 36  | 23  | 43 | 63.8<br>± 3.2   |
| 36 |  | 55   | 72  | 56  | 56  | 34 | 28.2<br>± 2.6   |
| 37 |  | 1070 | 48  | 58  | 38  | 41 | 0.7<br>± 0.1    |
| 38 |  | 670  | 216 | 215 | 107 | 32 | 25.7<br>± 2.9   |

|    |                                                                                     |      |    |      |    |    |                |
|----|-------------------------------------------------------------------------------------|------|----|------|----|----|----------------|
| 39 | 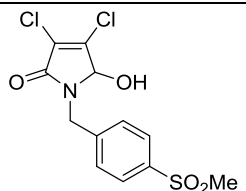   | 975  | 60 | > 90 | 25 | 34 | 41.4<br>± 5.4  |
| 40 |    | 2005 | 27 | 36   | 13 | 32 | 15.3<br>± 2.5  |
| 41 |    | 365  | 40 | 39   | 30 | 35 | 51.4<br>± 8.2  |
| 42 |    | 190  | 40 | 55   | 17 | 40 | 49.1<br>± 12.4 |
| 43 |   | 285  | 60 | > 90 | 45 | 69 | 58.3<br>± 0.6  |
| 44 |  | 155  | 60 | 63   | 39 | 31 | 45.9<br>± 8.1  |
| 45 |  | 115  | 48 | 43   | 37 | 31 | 54.2<br>± 4.2  |
| 46 |  | 170  | 40 | 42   | 36 | 32 | 23.1<br>± 0.8  |

|    |                                                                                     |      |    |     |    |    |               |
|----|-------------------------------------------------------------------------------------|------|----|-----|----|----|---------------|
| 47 | 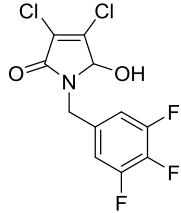   | 190  | 40 | 36  | 35 | 35 | 22.7<br>± 8.4 |
| 48 |    | 1240 | 32 | 38  | 24 | 14 | 36.5<br>± 7.6 |
| 49 |    | 590  | 96 | 131 | 67 | 64 | 44.6<br>± 1.2 |
| 50 |   | 800  | 60 | 85  | 29 | 54 | 39.6<br>± 2.6 |
| 51 |  | 590  | 72 | 89  | 28 | 53 | 44.0<br>± 1.0 |

<sup>a</sup> Peak fold enhancement is the peak fold change in viral expression units (VEU) relative to vehicle-treated infected samples. <sup>b</sup> PFE dose is the drug concentration used to achieve the peak fold change in VEU. <sup>c</sup> No reaction with glutathione observed. <sup>d</sup> No enhancement of VEU. <sup>e</sup> No data.

| Gene   | Forward primer             | Reverse primer                | Product size (bp) |
|--------|----------------------------|-------------------------------|-------------------|
| IFIT3  | 5'-GCACAGACCTAACAGCACCC-3' | 5'-TTGGTGACCTCACTCATGATGGC-3' | 134               |
| IFI 44 | 5'-CCCATCGCTGAAGGACAGAA-3' | 5'-CACATGTACCACACCAGCGT-3'    | 136               |
| GBP3   | 5'-ACTGGTGGCGAATCCAGAAG-3' | 5'-GCCAGAGAGAAGCCCTTATT-3'    | 145               |

MX2 5'-GAACGTGCAGCGAGCTTGTC-3' 5'-AAGGCTTGTGGGCCTTAGAC-3' 105

## Supplementary Table S2. RT-qPCR Primers

### Synthetic methods and characterization

#### General information

All reactions were performed in oven-dried glass round-bottom flasks equipped with magnetic stir bars. Purification of reaction products was carried out by flash column chromatography using silica gel. Analytical thin-layer chromatography (TLC) was performed using silica gel 60 F<sub>254</sub> plates from EMD. <sup>1</sup>H and <sup>13</sup>C NMR spectra were recorded on a Bruker 400 MHz and 100 MHz, respectively, at ambient temperature. Spectra are recorded in parts per million using residual solvent as the internal standard ((CD<sub>3</sub>)<sub>2</sub>SO at 2.50 ppm, CDCl<sub>3</sub> at 7.26 ppm and CD<sub>3</sub>OD at 3.31 ppm for <sup>1</sup>H NMR and (CD<sub>3</sub>)<sub>2</sub>SO at 39.52 ppm, CDCl<sub>3</sub> at 77.16 ppm and CD<sub>3</sub>OD at 49.00 ppm for <sup>13</sup>C NMR.) <sup>1</sup>H NMR data was reported as: multiplicity (br = broad, s = singlet, d = doublet, t = triplet, q = quartet, quin. = quintet, sext. = sextuplet, sept = septuplet, m = multiplet), integration and coupling constant(s) in Hz. High-resolution mass spectrometry was performed in positive ion mode via nanoESI MS using a QStarXL hybrid quadrupole time-of-flight mass spectrometer.

#### Materials

Unless otherwise noted, all commercially available materials were purchased from commercial sources and used without further purification.

#### 3,4,5-Trichloro-5H-furan-2-one

Muochloric acid (5 g, 26.7 mmol) was added to 17.8 mL of thionyl chloride. A catalytic amount of dimethylformamide (3 drops) was added and the mixture was heated at 70 °C for 5 hours. The mixture was cooled and excess thionyl chloride was evaporated under vacuum. Toluene (100 mL) was added to the flask and evaporated under vacuum 3 times to azeotrope any residual thionyl chloride. The crude product was isolated as a yellow oil was used in subsequent reactions without further purification.

**General procedure A**

An amine (2.2 equiv.) was added to dioxane (0.3 M). 3,4,5-Trichloro-5*H*-furan-2-one (1.0 equiv.) was added dropwise and the mixture was allowed to stir at room temperature for 16 hours. The reaction mixture was quenched with  $\text{NH}_4\text{Cl}_{(\text{aq})}$  and extracted 3  $\times$  with EtOAc. The organic fractions were washed with brine, dried over  $\text{Na}_2\text{SO}_4$  and concentrated. The desired compound was purified by silica column chromatography.

**General procedure B**

3,4-dichloro-5-phenyl-2,5-dihydrofuran-2-one (1 equiv.) was added to DMF (0.05 M) and an amine (3 equiv.) was added. The reaction was allowed to stir at room temperature for 16 hours.  $\text{NH}_4\text{Cl}_{(\text{aq})}$  was added to quench the reaction and the mixture was extracted 3  $\times$  with EtOAc. The organic fractions were combined and washed with brine, dried over  $\text{Na}_2\text{SO}_4$  and concentrated. The desired compound was purified with silica column chromatography.

**3,4-dichloro-5-phenyl-2,5-dihydrofuran-2-one, Compound 1**

Mucochloric acid (2.00 g, 1 equiv.) was dissolved in benzene (10 mL) in a round-bottom flask equipped with a stir bar.  $\text{AlCl}_3$  (2.37 g, 1.5 equiv.) was added and the solution was allowed to stir for 3 days. The mixture was poured over an HCl / ice mixture (5.7 mL conc. HCl). The mixture was extracted 3  $\times$  with  $\text{Et}_2\text{O}$  and the combined organic fractions were washed with brine, dried over  $\text{Na}_2\text{SO}_4$  and concentrated. The desired compound was recrystallized from ethanol.  $^1\text{H}$  NMR (400 MHz, DMSO)  $\delta$  7.51 – 7.41 (m, 5H), 6.40 (s, 1H).  $^{13}\text{C}$  NMR (100 MHz, DMSO)  $\delta$  165.25, 152.50, 132.05, 130.34, 129.21, 127.83, 119.91, 83.10. HRMS (ESI): Exact mass calculated for  $\text{C}_{10}\text{H}_6\text{Cl}_2\text{O}_2$   $[\text{M} + \text{H}]^+$ : 228.9823. Found: 228.9944

**3,4-dibromo-5-phenyl-2,5-dihydrofuran-2-one, Compound 2**

Mucobromic acid (2.00 g, 1 equiv.) was dissolved in benzene (10 mL) in a round-bottom flask equipped with a stir bar.  $\text{AlCl}_3$  (1.56 g, 1.5 equiv.) was added and the solution was allowed to stir for 3 days. The mixture was poured over a HCl / ice mixture (5.7 mL conc. HCl). The mixture was extracted 3  $\times$  with  $\text{Et}_2\text{O}$  and the combined organic fractions were washed with brine, dried over  $\text{Na}_2\text{SO}_4$  and concentrated. The desired compound was purified with silica column chromatography.  $^1\text{H}$  NMR (400 MHz, DMSO)  $\delta$  7.50 – 7.43 (m, 3H), 7.42 – 7.34 (m, 2H), 6.37

(s, 1H).  $^{13}\text{C}$  NMR (100 MHz, DMSO)  $\delta$  166.54, 149.41, 132.64, 130.18, 129.15, 127.73, 113.95, 85.91. HRMS (ESI): Exact mass calculated for  $\text{C}_{10}\text{H}_6\text{Br}_2\text{O}_2$   $[\text{M} + \text{H}]^+$ : 316.8812. Found: 316.8970

#### **4-(benzylamino)-3-chloro-5-phenyl-2,5-dihydrofuran-2-one, Compound 3**

General procedure B.  $^1\text{H}$  NMR (400 MHz, DMSO)  $\delta$  7.35 (s, 1H), 7.33 – 7.29 (m,  $J = 7.4$  Hz, 5H), 7.18 – 7.05 (m, 5H), 6.57 (s, 1H), 4.32 (d,  $J = 15.7$  Hz, 1H), 4.04 (d,  $J = 15.6$  Hz, 1H).  $^{13}\text{C}$  NMR (100 MHz, DMSO)  $\delta$  167.11, 154.95, 137.85, 136.03, 128.66, 128.40, 127.77, 127.74, 126.53, 126.12, 121.95, 92.07, 42.65. HRMS (ESI): Exact mass calculated for  $\text{C}_{17}\text{H}_{14}\text{ClNO}_2$   $[\text{M} + \text{H}]^+$ : 300.0791. Found: 300.0780

#### **3-chloro-4-[(2-methylpropyl)amino]-5-phenyl-2,5-dihydrofuran-2-one, Compound 4**

General procedure B.  $^1\text{H}$  NMR (400 MHz, DMSO)  $\delta$  7.43 – 7.32 (m, 5H), 7.23 (s, 1H), 6.51 (s, 1H), 3.04 (dd,  $J = 13.9, 7.4$  Hz, 1H), 2.55 (dd,  $J = 13.9, 7.6$  Hz, 1H), 1.65 – 1.50 (m, 1H), 0.69 (dd,  $J = 6.6, 4.0$  Hz, 6H).  $^{13}\text{C}$  NMR (100 MHz, DMSO)  $\delta$  167.31, 154.53, 136.51, 128.73, 128.53, 125.92, 122.03, 91.95, 46.64, 27.08, 20.27, 20.22. HRMS (ESI): Exact mass calculated for  $\text{C}_{14}\text{H}_{16}\text{ClNO}_2$   $[\text{M} + \text{H}]^+$ : 266.0947. Found: 266.1802

#### **3,4-dichloro-2,5-dihydrofuran-2-one, Compound 5**

Compound 5 was synthesized as described by Bellina *et al.*<sup>1</sup>  $^1\text{H}$  NMR (400 MHz,  $\text{CDCl}_3$ )  $\delta$  4.87 (s, 2H).  $^{13}\text{C}$  NMR (100 MHz,  $\text{CDCl}_3$ )  $\delta$  165.93, 149.05, 121.26, 71.09. HRMS (ESI): Exact mass calculated for  $\text{C}_4\text{H}_2\text{Cl}_2\text{O}_2$   $[\text{M} + \text{H}]^+$ : 152.9510. Found: 152.9637

#### **3,4-dichloro-5-methoxy-2,5-dihydrofuran-2-one, Compound 6**

Mucochloric acid (250 mg, 1.47 mmol) was dissolved in 15 mL of methanol. A catalytic amount of  $\text{H}_2\text{SO}_4$  was added and the mixture was allowed to stir overnight. The solution was quenched with a saturated solution of  $\text{NaHCO}_3$  and extracted 3  $\times$  with EtOAc. The organic fractions were combined and washed with brine, dried over  $\text{Na}_2\text{SO}_4$  and concentrated. The desired compound (119 mg, 45%) was purified by silica column chromatography (10 % EtOAc in hexanes).  $^1\text{H}$  NMR (400 MHz,  $\text{CDCl}_3$ )  $\delta$  5.77 (s, 1H), 3.59 (s, 3H).  $^{13}\text{C}$  NMR (100 MHz,  $\text{CDCl}_3$ )  $\delta$  163.22,

147.36, 124.73, 101.58, 56.53. HRMS (ESI): Exact mass calculated for  $C_5H_4Cl_2O_3$   $[M + H]^+$ : 182.9615. Found: 183.2005

### **3,4-dichloro-5-(prop-2-yn-1-yloxy)-2,5-dihydrofuran-2-one, Compound 7**

Mucochloric acid (200 mg, 1.47 mmol) was dissolved in 2 mL of toluene. Propargyl alcohol (119 mg, 1.5 equiv.) and a catalytic amount of  $H_2SO_4$  was added. The flask was equipped with a Dean-stark trap and the solution was refluxed overnight. The solution was quenched with a saturated solution of  $NaHCO_3$  and extracted 3  $\times$  with EtOAc. The organic fractions were combined and washed with brine, dried over  $Na_2SO_4$  and concentrated. The desired compound (232 mg, 76 %) was purified from the crude mixture by silica column chromatography (10 % EtOAc in hexanes).  $^1H$  NMR (400 MHz,  $CDCl_3$ )  $\delta$  6.05 (s, 1H), 4.50 (dd,  $J = 4.0, 2.4$  Hz, 2H), 2.64 (t,  $J = 2.4$  Hz, 1H).  $^{13}C$  NMR (100 MHz,  $CDCl_3$ )  $\delta$  163.11, 147.51, 124.61, 98.59, 77.74, 76.75, 57.41. HRMS (ESI): Exact mass calculated for  $C_7H_4Cl_2O_3$   $[M + H]^+$ : 206.9615. Found: 206.9595

### **4,5-dichloro-1-phenyl-1H-pyrazol-3(2H)-one, Compound 8**

Commercial compound used without further purification. HRMS (ESI): Exact mass calculated for  $C_9H_6Cl_2N_2O$   $[M + H]^+$ : 228.9935. Found: 228.9950

### **3,4-dichloro-5-hydroxy-2,5-dihydro-1H-pyrrol-2-one, Compound 9**

Compound 9 (238 mg, 18 %) was synthesized as described by Ratts *et al.*<sup>2</sup>  $^1H$  NMR (400 MHz, DMSO)  $\delta$  9.18 (s, 1H), 6.79 (d,  $J = 9.6$  Hz, 1H), 5.46 (dd,  $J = 9.6, 1.6$  Hz, 1H).  $^{13}C$  NMR (100 MHz, DMSO)  $\delta$  163.41, 145.70, 124.94, 79.05. HRMS (ESI): Exact mass calculated for  $C_4H_3Cl_2NO_2$   $[M + H]^+$ : 167.9619. Found: 167.9630

### **1-benzyl-3,4-dichloro-5-hydroxy-2,5-dihydro-1H-pyrrol-2-one, Compound 10**

General procedure A.  $^1H$  NMR (400 MHz, DMSO)  $\delta$  7.41 – 7.17 (m, 6H), 5.34 (d,  $J = 9.3$  Hz, 1H), 4.72 (d,  $J = 15.6$  Hz, 1H), 4.33 (d,  $J = 15.6$  Hz, 1H).  $^{13}C$  NMR (100 MHz, DMSO)  $\delta$  161.65, 144.47, 136.93, 128.51, 127.69, 127.29, 124.67, 81.46, 43.26.

**1-benzyl-3,4-dichloro-1*H*-pyrrol-2(5*H*)-one, Compound 11**

Compound 11 (249 mg, 35 %) was synthesized as described by Zhang *et al.*<sup>3</sup> <sup>1</sup>H NMR (400 MHz, CDCl<sub>3</sub>) δ 7.38 – 7.22 (m, 5H), 4.65 (s, 2H), 3.90 (s, 2H). <sup>13</sup>C NMR (100 MHz, CDCl<sub>3</sub>) δ 164.37, 139.96, 136.00, 129.16, 128.37, 128.29, 125.69, 52.93, 47.10. HRMS (ESI): Exact mass calculated for C<sub>11</sub>H<sub>9</sub>Cl<sub>2</sub>NO [M + H]<sup>+</sup>: 242.0139. Found: 242.0674

**1-benzyl-3,4-dichloro-5-methoxy-1*H*-pyrrol-2(5*H*)-one, Compound 12**

1-benzyl-3,4-dichloro-5-hydroxy-2,5-dihydro-1*H*-pyrrol-2-one (150 mg, 0.58 mmol) was dissolved in 5 mL of methanol. A catalytic amount of H<sub>2</sub>SO<sub>4</sub> was added and the mixture was allowed to stir overnight. The solution was quenched with a saturated solution of NaHCO<sub>3</sub> and extracted 3 × with EtOAc. The organic fractions were combined and washed with brine, dried over Na<sub>2</sub>SO<sub>4</sub> and concentrated. The desired compound (104 mg, 66 %) was purified from the crude mixture by silica column chromatography (10 to 15 % EtOAc in hexanes). <sup>1</sup>H NMR (400 MHz, DMSO) δ 7.38 – 7.25 (m, 5H), 5.55 (s, 1H), 4.67 (d, *J* = 15.4 Hz, 1H), 4.35 (d, *J* = 15.4 Hz, 1H), 2.98 (s, 3H). <sup>13</sup>C NMR (100 MHz, DMSO) δ 162.07, 141.34, 136.42, 128.57, 128.01, 127.53, 126.51, 86.84, 50.49, 44.14. HRMS (ESI): Exact mass calculated for C<sub>12</sub>H<sub>11</sub>Cl<sub>2</sub>NO<sub>2</sub> [M + H]<sup>+</sup>: 272.0245. Found: 272.0350

**1-benzyl-3,4-dichloro-5-oxo-2,5-dihydro-1*H*-pyrrol-2-yl acetate, Compound 13**

1-benzyl-3,4-dichloro-5-hydroxy-2,5-dihydro-1*H*-pyrrol-2-one (150 mg, 0.58 mmol) was dissolved in 3 mL of acetic anhydride. Pyridine (1.16 mol, 2.0 equiv.) was added and the mixture was allowed to stir for 6 hours at room temperature. The reaction was quenched with 10% HCl<sub>(aq)</sub> and extracted 3 × with EtOAc. The organic fractions were combined and washed with brine, dried over Na<sub>2</sub>SO<sub>4</sub> and concentrated. The desired compound (159 mg, 91 %) was purified from the crude mixture by silica column chromatography (5 to 15 % EtOAc in hexanes). <sup>1</sup>H NMR (400 MHz, DMSO) δ 7.41 – 7.18 (m, 5H), 6.71 (s, 1H), 4.61 (d, *J* = 15.7 Hz, 1H), 4.48 (d, *J* = 15.7 Hz, 1H), 1.88 (s, 3H). <sup>13</sup>C NMR (100 MHz, DMSO) δ 169.51, 162.47, 140.89, 136.22, 128.51, 127.68, 127.49, 126.48, 80.42, 44.95, 20.04. HRMS (ESI): Exact mass calculated for C<sub>13</sub>H<sub>11</sub>Cl<sub>2</sub>NO<sub>3</sub> [M + H]<sup>+</sup>: 300.0194. Found: 300.0236



**1-benzyl-3,4-dichloro-1H-pyrrole-2,5-dione, Compound 14**

Compound 14 was synthesized as described by Holz *et al.*<sup>4</sup> <sup>1</sup>H NMR (400 MHz, DMSO)  $\delta$  7.44 – 7.17 (m, 5H), 4.67 (s, 2H). <sup>13</sup>C NMR (100 MHz, DMSO)  $\delta$  163.04, 135.76, 132.56, 128.49, 127.54, 127.42, 42.02. HRMS (ESI): Exact mass calculated for C<sub>11</sub>H<sub>7</sub>Cl<sub>2</sub>NO<sub>2</sub> [M + H]<sup>+</sup>: 255.9932. Found: 256.0033

**1-benzyl-3,4-dichloro-5-hydroxy-5-phenyl-1H-pyrrol-2(5H)-one, Compound 15**

1-benzyl-3,4-dichloro-1H-pyrrole-2,5-dione (100 mg, 0.39 mmol) was dissolved in 1.95 mL of THF and the solution was cooled to -78 ° C. Phenyllithium (0.39 mmol, 1.0 equivalent, 1.9 M in dibutyl ether) was added dropwise and the solution was allowed to stir for 1 hour before warming to room temperature. The reaction was quenched with a saturated NH<sub>4</sub>Cl<sub>(aq)</sub> solution and extracted 3 × with EtOAc. The organic fractions were combined and washed with brine, dried over Na<sub>2</sub>SO<sub>4</sub> and concentrated. The desired compound (64 mg, 49 %) was purified from the crude mixture by silica column chromatography (5 to 15 % EtOAc in hexanes). <sup>1</sup>H NMR (400 MHz, DMSO)  $\delta$  7.62 (s, 1H), 7.34 (s, 5H), 7.19 – 7.06 (m, 5H), 4.37 (d, *J* = 15.6 Hz, 1H), 4.12 (d, *J* = 15.6 Hz, 1H). <sup>13</sup>C NMR (100 MHz, DMSO)  $\delta$  162.22, 147.86, 137.09, 135.26, 129.04, 128.61, 127.89, 127.88, 126.81, 126.18, 124.16, 90.83, 43.32. HRMS (ESI): Exact mass calculated for C<sub>17</sub>H<sub>13</sub>Cl<sub>2</sub>NO<sub>2</sub> [M + H]<sup>+</sup>: 334.0401. Found: 334.0520

**1-benzyl-5-hydroxy-1H-pyrrol-2(5H)-one, Compound 16**

Compound 16 (104 mg, 55 %) was synthesized as described by Yamashita *et al.*<sup>5</sup> <sup>1</sup>H NMR (400 MHz, DMSO)  $\delta$  7.37 – 7.19 (m, 5H), 7.09 (dd, *J* = 6.0, 1.5 Hz, 1H), 6.42 (d, *J* = 8.7 Hz, 1H), 6.18 (d, *J* = 6.0 Hz, 1H), 5.26 (d, *J* = 8.7 Hz, 1H), 4.71 (d, *J* = 15.4 Hz, 1H), 4.20 (d, *J* = 15.4 Hz, 1H). <sup>13</sup>C NMR (100 MHz, DMSO)  $\delta$  168.80, 147.76, 138.10, 128.43, 127.49, 127.06, 126.99, 81.87, 41.73. HRMS (ESI): Exact mass calculated for C<sub>11</sub>H<sub>11</sub>NO<sub>2</sub> [M + H]<sup>+</sup>: 190.0868. Found: 190.0870

**1-benzyl-5-hydroxy-3,4-dimethyl-1H-pyrrol-2(5H)-one, Compound 17**

2,3-Dimethylmaleic anhydride (630 mg, 5 mmol) was dissolved in acetic acid (7.5 mL). Benzylamine (535 mg, 5 mmol) was added drop wise and the mixture was refluxed for 2 hours. The solution was concentrated and 1-benzyl-3,4-dimethyl-1H-pyrrole-2,5-dione (956 mg, 89 %)

was isolated by silica column chromatography (10% EtOAc in hexanes). 1-benzyl-3,4-dimethyl-1H-pyrrole-2,5-dione (215 mg, 1 mmol) was dissolved in THF (3 mL). The solution was cooled to -15 °C and a solution of LiAlH(O<sup>t</sup>Bu)<sub>3</sub> (305 mg, 1.2 equiv.) in THF (2 mL) was added dropwise and the resulting mixture was allowed to react for 1 hour. The solution was warmed to room temperature and stirred for another hour. The reaction was subsequently quenched with 10 % HCl<sub>(aq)</sub> and extracted 3 × with EtOAc. The organic fractions were combined and washed with brine, dried over Na<sub>2</sub>SO<sub>4</sub> and concentrated. The desired compound (147 mg, 68 %) was purified from the crude mixture by silica column chromatography (50 % EtOAc in hexanes). <sup>1</sup>H NMR (400 MHz, DMSO) δ 7.38 – 7.17 (m, 5H), 6.25 (d, *J* = 8.7 Hz, 1H), 4.92 (d, *J* = 8.6 Hz, 1H), 4.71 (d, *J* = 15.4 Hz, 1H), 4.19 (d, *J* = 15.4 Hz, 1H), 1.86 (s, *J* = 0.5 Hz, 3H), 1.70 (s, *J* = 1.1 Hz, 3H). <sup>13</sup>C NMR (100 MHz, DMSO) δ 169.94, 149.58, 138.33, 128.39, 127.56, 127.27, 126.91, 82.19, 42.04, 11.18, 8.25. HRMS (ESI): Exact mass calculated for C<sub>13</sub>H<sub>15</sub>NO<sub>2</sub> [M + H]<sup>+</sup>: 218.1181. Found: 218.1077

### **3,4-dichloro-1-(furan-2-ylmethyl)-5-hydroxy-1H-pyrrol-2(5H)-one, Compound 18**

General procedure A. <sup>1</sup>H NMR (400 MHz, DMSO) δ 7.59 (d, *J* = 1.1 Hz, 1H), 7.21 (d, *J* = 9.3 Hz, 1H), 6.40 (dd, *J* = 3.1, 1.9 Hz, 1H), 6.36 (d, *J* = 3.1 Hz, 1H), 5.34 (d, *J* = 8.9 Hz, 1H), 4.71 (d, *J* = 16.0 Hz, 1H), 4.32 (d, *J* = 16.0 Hz, 1H). <sup>13</sup>C NMR (100 MHz, DMSO) δ 161.29, 149.86, 144.73, 142.77, 124.56, 110.55, 108.22, 81.37, 36.17. HRMS (ESI): Exact mass calculated for C<sub>9</sub>H<sub>7</sub>Cl<sub>2</sub>NO<sub>3</sub> [M + H]<sup>+</sup>: 247.9881. Found: 247.9958

### **3,4-dichloro-5-hydroxy-1-(thiophen-2-ylmethyl)-1H-pyrrol-2(5H)-one, Compound 19**

General procedure A. <sup>1</sup>H NMR (400 MHz, DMSO) δ 7.45 (dd, *J* = 5.1, 1.1 Hz, 1H), 7.28 (d, *J* = 9.3 Hz, 1H), 7.05 (d, *J* = 2.8 Hz, 1H), 6.98 (dd, *J* = 5.0, 3.5 Hz, 1H), 5.36 (d, *J* = 9.3 Hz, 1H), 4.84 (d, *J* = 15.8 Hz, 1H), 4.52 (d, *J* = 15.8 Hz, 1H). <sup>13</sup>C NMR (101 MHz, DMSO) δ 155.26, 138.69, 132.99, 120.95, 120.94, 120.05, 118.54, 75.12, 31.88. HRMS (ESI): Exact mass calculated for C<sub>9</sub>H<sub>7</sub>Cl<sub>2</sub>NO<sub>2</sub>S [M + H]<sup>+</sup>: 263.9652. Found: 263.9713

### **2-benzyl-3-hydroxyisoindolin-1-one, Compound 20**

Phthalic anhydride (1.48 g, 10 mmol) was dissolved in acetic acid (15 mL). Benzylamine (1.70 g, 10 mmol) was added dropwise and the mixture was refluxed for 2 hours. The solution was

concentrated and 2-benzylisoindoline-1,3-dione (2.07 g, 96 %) was isolated by silica column chromatography (10% EtOAc in hexanes). 2-benzylisoindoline-1,3-dione (237 mg, 1 mmol) was dissolved in THF (3 mL). The solution was cooled to -15 °C and a solution of LiAlH(O<sup>t</sup>Bu)<sub>3</sub> (305 mg, 1.2 equiv.) in THF (2 mL) was added dropwise and the resulting mixture was allowed to react for 1 hour. The solution was warmed to room temperature and stirred for another hour. The reaction was subsequently quenched with 10 % HCl<sub>(aq)</sub> and extracted 3 × with EtOAc. The organic fractions were combined and washed with brine, dried over Na<sub>2</sub>SO<sub>4</sub> and concentrated. The desired compound (161 mg, 67 %) was purified from the crude mixture by silica column chromatography (40 % EtOAc in hexanes) <sup>1</sup>H NMR (400 MHz, DMSO) δ 7.75 – 7.50 (m, 4H), 7.39 – 7.21 (m, 5H), 6.75 (d, *J* = 8.8 Hz, 1H), 5.67 (d, *J* = 8.8 Hz, 1H), 4.92 (d, *J* = 15.3 Hz, 1H), 4.37 (d, *J* = 15.3 Hz, 1H). <sup>13</sup>C NMR (100 MHz, DMSO) δ 166.14, 144.88, 137.73, 132.07, 131.41, 129.40, 128.48, 127.67, 127.09, 123.74, 122.45, 80.28, 42.11. HRMS (ESI): Exact mass calculated for C<sub>15</sub>H<sub>13</sub>NO<sub>2</sub> [M + H]<sup>+</sup>: 240.1024. Found: 240.1022

***N*-(2-(1-benzyl-4-chloro-2-hydroxy-5-oxo-2,5-dihydro-1*H*-pyrrol-3-ylthio)ethyl)acetamide, Compound 21**

1-benzyl-3,4-dichloro-5-hydroxy-2,5-dihydro-1*H*-pyrrol-2-one (100 mg, 0.39 mmol) and *N*-acetylcysteamine (52 mg, 0.43 mmol) were added to 1 ml of DMSO. The mixture was allowed to stir overnight at room temperature. The desired compound (73 mg, 55 %) was purified from the mixture by silica column chromatography (70 % EtOAc in hexanes). <sup>1</sup>H NMR (400 MHz, DMSO) δ 8.11 (s, 1H), 7.38 – 7.20 (m, 5H), 7.04 (d, *J* = 9.9 Hz, 1H), 5.48 (d, *J* = 9.9 Hz, 1H), 4.69 (d, *J* = 15.6 Hz, 1H), 4.29 (d, *J* = 15.6 Hz, 1H), 3.32 – 3.14 (m, 4H), 1.75 (s, 3H). <sup>13</sup>C NMR (100 MHz, DMSO) δ 169.46, 162.55, 151.04, 137.36, 128.48, 127.62, 127.18, 119.59, 81.14, 43.07, 38.77, 29.61, 22.42. HRMS (ESI): Exact mass calculated for C<sub>15</sub>H<sub>17</sub>Cl<sub>2</sub>N<sub>2</sub>O<sub>3</sub>S [M + H]<sup>+</sup>: 341.0726. Found: 341.0738

**3,4-dichloro-5-hydroxy-1-methyl-1*H*-pyrrol-2(5*H*)-one, Compound 22**

General procedure A. <sup>1</sup>H NMR (400 MHz, MeOD) δ 5.28 (s, 1H), 2.97 (s, 3H). <sup>13</sup>C NMR (100 MHz, MeOD) δ 164.28, 145.42, 126.72, 84.67, 26.90. HRMS (ESI): Exact mass calculated for C<sub>5</sub>H<sub>5</sub>Cl<sub>2</sub>NO<sub>2</sub> [M + H]<sup>+</sup>: 181.9775. Found: 181.9820

**3,4-dichloro-1-ethyl-5-hydroxy-1H-pyrrol-2(5H)-one, Compound 23**

General procedure A.  $^1\text{H}$  NMR (400 MHz,  $\text{CDCl}_3$ )  $\delta$  5.29 (s, 1H), 4.67 (s, 1H), 3.61 (dq,  $J = 14.5, 7.3$  Hz, 1H), 3.35 (dq,  $J = 14.2, 7.1$  Hz, 1H), 1.18 (t,  $J = 7.2$  Hz, 3H).  $^{13}\text{C}$  NMR (100 MHz,  $\text{CDCl}_3$ )  $\delta$  162.97, 143.68, 126.38, 81.98, 35.43, 13.63. HRMS (ESI): Exact Mass for  $[\text{M} + \text{H}]^+$ : Not determined

**3,4-dichloro-5-hydroxy-1-propyl-1H-pyrrol-2(5H)-one, Compound 24**

General procedure A.  $^1\text{H}$  NMR (400 MHz,  $\text{CDCl}_3$ )  $\delta$  5.26 (s, 1H), 3.89 (s, 1H), 3.52 (ddd,  $J = 14.0, 8.5, 7.2$  Hz, 1H), 3.28 (ddd,  $J = 14.0, 8.5, 5.6$  Hz, 1H), 1.72 – 1.51 (m, 2H), 0.92 (t,  $J = 7.4$  Hz, 3H).  $^{13}\text{C}$  NMR (100 MHz,  $\text{CDCl}_3$ )  $\delta$  163.06, 143.44, 126.71, 82.35, 42.18, 21.71, 11.42. HRMS (ESI): Exact mass calculated for  $\text{C}_7\text{H}_9\text{Cl}_2\text{NO}_2$   $[\text{M} + \text{H}]^+$ : 210.0088. Found: 210.0150

**3,4-dichloro-1-cyclopropyl-5-hydroxy-1H-pyrrol-2(5H)-one, Compound 25**

General procedure A.  $^1\text{H}$  NMR (400 MHz, MeOD)  $\delta$  5.32 (s, 1H), 2.65 – 2.58 (m, 1H), 1.04 – 0.96 (m, 1H), 0.89 – 0.71 (m, 4H).  $^{13}\text{C}$  NMR (100 MHz, MeOD)  $\delta$  165.39, 145.51, 126.40, 84.48, 24.26, 5.85, 5.34. HRMS (ESI): Exact mass calculated for  $\text{C}_7\text{H}_7\text{Cl}_2\text{NO}_2$   $[\text{M} + \text{H}]^+$ : 207.9932. Found: 207.9984

**1-allyl-3,4-dichloro-5-hydroxy-1H-pyrrol-2(5H)-one, Compound 26**

General procedure A.  $^1\text{H}$  NMR (400 MHz, DMSO)  $\delta$  7.07 (d,  $J = 9.3$  Hz, 1H), 5.79 (dddd,  $J = 16.6, 10.3, 6.3, 4.9$  Hz, 1H), 5.39 (d,  $J = 9.1$  Hz, 1H), 5.16 (ddq,  $J = 14.6, 10.2, 1.5$  Hz, 2H), 4.11 (ddt,  $J = 16.1, 4.7, 1.6$  Hz, 1H), 3.78 (ddt,  $J = 16.1, 6.3, 1.3$  Hz, 1H).  $^{13}\text{C}$  NMR (100 MHz, DMSO)  $\delta$  161.29, 144.36, 133.01, 124.65, 117.21, 81.34, 42.01. HRMS (ESI): Exact mass calculated for  $\text{C}_7\text{H}_7\text{Cl}_2\text{NO}_2$   $[\text{M} + \text{H}]^+$ : 207.9932. Found: 207.9976

**3,4-dichloro-5-hydroxy-1-(prop-2-ynyl)-1H-pyrrol-2(5H)-one, Compound 27**

General procedure A.  $^1\text{H}$  NMR (400 MHz, DMSO)  $\delta$  7.24 (d,  $J = 9.3$  Hz, 1H), 5.47 (d,  $J = 9.0$  Hz, 1H), 4.33 (dd,  $J = 17.9, 2.5$  Hz, 1H), 3.95 (dd,  $J = 17.9, 2.5$  Hz, 1H), 3.27 (t,  $J = 2.5$  Hz, 1H).  $^{13}\text{C}$  NMR (100 MHz, DMSO)  $\delta$  161.10, 145.01, 124.42, 81.19, 78.48, 74.51, 29.11. HRMS (ESI): Exact mass calculated for  $\text{C}_7\text{H}_5\text{Cl}_2\text{NO}_2$   $[\text{M} + \text{H}]^+$ : 205.9775. Found: 205.9814

**3,4-dichloro-5-hydroxy-1-(2-morpholinoethyl)-1*H*-pyrrol-2(5*H*)-one, Compound 28**

General procedure A. <sup>1</sup>H NMR (400 MHz, CDCl<sub>3</sub>) δ 9.10 (s, 1H), 5.22 (s, 1H), 4.14 (dt, *J* = 15.3, 3.0 Hz, 1H), 3.77 (t, *J* = 4.6 Hz, 4H), 3.22 (ddd, *J* = 15.3, 11.6, 2.1 Hz, 1H), 2.80 – 2.71 (m, 2H), 2.67 (ddd, *J* = 14.2, 11.6, 2.7 Hz, 1H), 2.53 – 2.44 (m, 3H). <sup>13</sup>C NMR (100 MHz, CDCl<sub>3</sub>) δ 163.02, 144.37, 125.84, 82.91, 66.27, 58.20, 53.36, 39.37. HRMS (ESI): Exact mass calculated for C<sub>10</sub>H<sub>14</sub>Cl<sub>2</sub>N<sub>2</sub>O<sub>3</sub> [M + H]<sup>+</sup>: 281.0459. Found: 281.0402

**3,4-dichloro-5-hydroxy-1-phenethyl-1*H*-pyrrol-2(5*H*)-one, Compound 29**

General procedure A. <sup>1</sup>H NMR (400 MHz, MeOD) δ 7.38 – 7.17 (m, 5H), 5.13 (s, 1H), 3.85 – 3.73 (m, 1H), 3.61 – 3.44 (m, 1H), 3.04 – 2.81 (m, 2H). <sup>13</sup>C NMR (100 MHz, MeOD) δ 164.13, 145.56, 139.92, 129.78, 129.67, 127.64, 83.66, 42.95, 35.43. HRMS (ESI): Exact mass calculated for C<sub>12</sub>H<sub>11</sub>Cl<sub>2</sub>NO<sub>2</sub> [M + H]<sup>+</sup>: 272.0245. Found: 272.0350

**3,4-dichloro-5-hydroxy-1-(3-phenylpropyl)-1*H*-pyrrol-2(5*H*)-one, Compound 30**

General procedure A. <sup>1</sup>H NMR (400 MHz, DMSO) δ 7.21 (qdd, *J* = 8.5, 5.1, 1.5 Hz, 5H), 7.03 (d, *J* = 9.6 Hz, 1H), 5.45 (d, *J* = 9.5 Hz, 1H), 3.46 (dt, *J* = 14.9, 7.5 Hz, 1H), 3.25 (ddd, *J* = 13.8, 7.9, 5.8 Hz, 1H), 2.58 (t, *J* = 7.8 Hz, 2H), 1.93 – 1.74 (m, 2H). <sup>13</sup>C NMR (100 MHz, DMSO) δ 161.49, 144.02, 141.43, 128.27, 128.25, 125.77, 124.67, 81.55, 39.65, 32.47, 29.53. HRMS (ESI): Exact mass calculated for C<sub>13</sub>H<sub>13</sub>Cl<sub>2</sub>NO<sub>2</sub> [M + H]<sup>+</sup>: 286.0401. Found: 286.0529

**3,4-dichloro-5-hydroxy-1-(4-phenylbutyl)-1*H*-pyrrol-2(5*H*)-one, Compound 31**

General procedure A. <sup>1</sup>H NMR (400 MHz, DMSO) δ 7.32 – 7.23 (m, 2H), 7.22 – 7.13 (m, 3H), 7.03 (d, *J* = 9.4 Hz, 1H), 5.41 (d, *J* = 9.3 Hz, 1H), 3.44 (dd, *J* = 13.8, 7.2 Hz, 1H), 3.30 – 3.19 (m, 1H), 2.64 – 2.53 (m, 2H), 1.63 – 1.48 (m, 4H). <sup>13</sup>C NMR (100 MHz, DMSO) δ 161.45, 143.98, 142.01, 128.28, 128.22, 125.66, 124.67, 81.50, 39.60, 34.70, 28.25, 27.44. HRMS (ESI): Exact mass calculated for C<sub>14</sub>H<sub>15</sub>Cl<sub>2</sub>NO<sub>2</sub> [M + H]<sup>+</sup>: 300.0558. Found: 300.0699

**1-(biphenyl-4-ylmethyl)-3,4-dichloro-5-hydroxy-1*H*-pyrrol-2(5*H*)-one, Compound 32**

General procedure A. <sup>1</sup>H NMR (400 MHz, DMSO) δ 7.68 – 7.60 (m, 4H), 7.50 – 7.32 (m, 5H), 7.27 (d, *J* = 9.2 Hz, 1H), 5.40 (d, *J* = 9.2 Hz, 1H), 4.75 (d, *J* = 15.6 Hz, 1H), 4.39 (d, *J* = 15.6 Hz, 1H). <sup>13</sup>C NMR (100 MHz, DMSO) δ 161.68, 144.50, 139.82, 139.24, 136.18, 128.92, 128.36,

127.42, 126.82, 126.61, 124.68, 81.53, 43.03. HRMS (ESI): Exact Mass for  $[M + H]^+$ : Not determined

### **3,4-dichloro-5-hydroxy-1-(3-phenylprop-2-ynyl)-1*H*-pyrrol-2(5*H*)-one, Compound 33**

General procedure A.  $^1\text{H}$  NMR (400 MHz, DMSO)  $\delta$  7.45 (dt,  $J = 8.6, 3.7$  Hz, 2H), 7.41 – 7.35 (m, 3H), 7.28 (d,  $J = 9.3$  Hz, 1H), 5.60 (d,  $J = 9.0$  Hz, 1H), 4.60 (d,  $J = 18.0$  Hz, 1H), 4.22 (d,  $J = 18.0$  Hz, 1H).  $^{13}\text{C}$  NMR (100 MHz, DMSO)  $\delta$  161.12, 145.11, 131.53, 128.78, 128.61, 124.43, 121.83, 84.26, 82.88, 81.24, 29.81. HRMS (ESI): Exact mass calculated for  $\text{C}_{13}\text{H}_9\text{Cl}_2\text{NO}_2$   $[M + H]^+$ : 282.0088. Found: 282.0056

### **3,4-dichloro-5-hydroxy-1-(1-phenylethyl)-1*H*-pyrrol-2(5*H*)-one, Compound 34**

General procedure A. Compound isolated as a 1:1 mixture of diastereoisomers.  $^1\text{H}$  NMR (400 MHz, DMSO)  $\delta$  7.44 – 7.22 (m, 5H+5H), 7.19 (d,  $J = 9.4$  Hz, 1H), 7.11 (d,  $J = 9.8$  Hz, 1H), 5.62 (d,  $J = 9.4$  Hz, 1H), 5.29 (d,  $J = 9.7$  Hz, 1H), 5.12 (q,  $J = 7.2$  Hz, 1H), 4.97 (q,  $J = 7.3$  Hz, 1H), 1.68 (d,  $J = 7.4$  Hz, 3H), 1.65 (d,  $J = 7.3$  Hz, 3H).  $^{13}\text{C}$  NMR (100 MHz, DMSO)  $\delta$  161.46, 161.21, 144.22, 144.14, 142.59, 140.49, 128.38, 128.13, 127.32, 127.09, 126.86, 126.69, 124.46, 124.41, 81.49, 81.31, 52.00, 51.30, 18.72, 18.14. HRMS (ESI): Exact mass calculated for  $\text{C}_{12}\text{H}_{11}\text{Cl}_2\text{NO}_2$   $[M + H]^+$ : 272.0245. Found: 272.0298

### **1-benzhydryl-3,4-dichloro-5-hydroxy-1*H*-pyrrol-2(5*H*)-one, Compound 35**

General procedure A.  $^1\text{H}$  NMR (400 MHz, DMSO)  $\delta$  7.43 – 7.19 (m, 11H), 6.12 (s, 1H), 5.26 (s, 1H).  $^{13}\text{C}$  NMR (100 MHz, DMSO)  $\delta$  161.42, 144.45, 139.63, 138.62, 129.12, 128.18, 128.10, 127.49, 127.21, 124.40, 81.91, 60.56. HRMS (ESI): Exact mass calculated for  $\text{C}_{17}\text{H}_{13}\text{Cl}_2\text{NO}_2$   $[M + H]^+$ : 334.0401. Found: 334.0435

### **3,4-dichloro-5-hydroxy-1-(2-methoxybenzyl)-1*H*-pyrrol-2(5*H*)-one, Compound 36**

General procedure A.  $^1\text{H}$  NMR (400 MHz, DMSO)  $\delta$  7.26 (td,  $J = 8.2, 1.6$  Hz, 1H), 7.14 (dd,  $J = 7.5, 1.4$  Hz, 1H), 6.99 (d,  $J = 7.8$  Hz, 1H), 6.90 (td,  $J = 7.4, 0.8$  Hz, 1H), 5.35 (s, 1H), 4.58 (d,  $J = 16.1$  Hz, 1H), 4.40 (d,  $J = 16.1$  Hz, 1H), 3.80 (s, 3H).  $^{13}\text{C}$  NMR (100 MHz, DMSO)  $\delta$  161.71, 156.65, 144.48, 128.59, 128.30, 124.68, 124.38, 120.21, 110.64, 81.75, 55.38, 38.51. HRMS (ESI): Exact mass calculated for  $\text{C}_{12}\text{H}_{11}\text{Cl}_2\text{NO}_3$   $[M + \text{Na}]^+$ : 310.0276. Found: 310.0014

**3,4-dichloro-5-hydroxy-1-(2-hydroxybenzyl)-1*H*-pyrrol-2(5*H*)-one, Compound 37**

General procedure A. <sup>1</sup>H NMR (400 MHz, DMSO) δ 9.61 (s, 1H), 7.15 – 7.03 (m, 3H), 6.81 (dd, *J* = 7.9, 0.7 Hz, 1H), 6.74 (td, *J* = 7.5, 1.0 Hz, 1H), 5.34 (d, *J* = 8.8 Hz, 1H), 4.57 (d, *J* = 15.9 Hz, 1H), 4.36 (d, *J* = 15.9 Hz, 1H). <sup>13</sup>C NMR (100 MHz, DMSO) δ 161.68, 154.85, 144.38, 128.70, 128.29, 124.70, 122.78, 118.88, 114.96, 81.67, 38.66. HRMS (ESI): Exact mass calculated for C<sub>11</sub>H<sub>9</sub>Cl<sub>2</sub>NO<sub>3</sub> [M + H]<sup>+</sup>: 274.0037. Found: 274.0120

**3,4-dichloro-1-(2-chlorobenzyl)-5-hydroxy-1*H*-pyrrol-2(5*H*)-one, Compound 38**

General procedure A. <sup>1</sup>H NMR (400 MHz, DMSO) δ 7.51 – 7.42 (m, 1H), 7.37 – 7.26 (m, 3H), 7.21 (d, *J* = 9.3 Hz, 1H), 5.41 (d, *J* = 9.3 Hz, 1H), 4.70 (d, *J* = 16.4 Hz, 1H), 4.52 (d, *J* = 16.4 Hz, 1H). <sup>13</sup>C NMR (100 MHz, DMSO) δ 161.88, 144.77, 133.98, 131.85, 129.27, 129.19, 129.07, 127.33, 124.60, 81.93, 41.29. HRMS (ESI): Exact mass calculated for C<sub>11</sub>H<sub>8</sub>Cl<sub>3</sub>NO<sub>2</sub> [M + H]<sup>+</sup>: 291.9698. Found: 291.9922

**3,4-dichloro-5-hydroxy-1-(4-(methylsulfonyl)benzyl)-1*H*-pyrrol-2(5*H*)-one, Compound 39**

General procedure A. <sup>1</sup>H NMR (400 MHz, DMSO) δ 7.89 (d, *J* = 8.3 Hz, 2H), 7.56 (d, *J* = 8.3 Hz, 2H), 7.25 (d, *J* = 9.3 Hz, 1H), 5.44 (d, *J* = 9.2 Hz, 1H), 4.74 (d, *J* = 16.2 Hz, 1H), 4.52 (d, *J* = 16.3 Hz, 1H), 3.20 (s, 3H). <sup>13</sup>C NMR (100 MHz, DMSO) δ 161.87, 144.69, 143.09, 139.72, 128.36, 127.15, 124.59, 81.92, 43.52, 43.17. HRMS (ESI): Exact mass calculated for C<sub>12</sub>H<sub>11</sub>Cl<sub>2</sub>NO<sub>4</sub>S [M + H]<sup>+</sup>: 335.9864. Found: 335.9834

**3,4-dichloro-5-hydroxy-1-(4-(trifluoromethyl)benzyl)-1*H*-pyrrol-2(5*H*)-one, Compound 40**

General procedure A. <sup>1</sup>H NMR (400 MHz, DMSO) δ 7.70 (d, *J* = 8.2 Hz, 2H), 7.52 (d, *J* = 8.1 Hz, 2H), 7.24 (d, *J* = 9.3 Hz, 1H), 5.43 (d, *J* = 9.3 Hz, 1H), 4.74 (d, *J* = 16.1 Hz, 1H), 4.49 (d, *J* = 16.1 Hz, 1H). <sup>13</sup>C NMR (100 MHz, DMSO) δ 161.85, 144.67, 141.91 (d, *J*<sub>(C,F)</sub> = 1.1 Hz), 128.38, 127.40 (q, *J*<sub>(C,F)</sub> = 31.7 Hz), 125.32 (q, *J*<sub>(C,F)</sub> = 3.8 Hz), 124.60, 124.27 (q, *J*<sub>(C,F)</sub> = 272.0 Hz), 81.84, 43.13. HRMS (ESI): Exact mass calculated for C<sub>12</sub>H<sub>8</sub>Cl<sub>2</sub>F<sub>3</sub>NO<sub>2</sub> [M + H]<sup>+</sup>: 325.9962. Found: 325.9960

**3,4-dichloro-5-hydroxy-1-(4-methylbenzyl)-1*H*-pyrrol-2(5*H*)-one, Compound 41**

General procedure A.  $^1\text{H}$  NMR (400 MHz, DMSO)  $\delta$  7.23 – 7.11 (m, 5H), 5.30 (d,  $J$  = 9.3 Hz, 1H), 4.68 (d,  $J$  = 15.4 Hz, 1H), 4.26 (d,  $J$  = 15.4 Hz, 1H), 2.27 (s, 3H).  $^{13}\text{C}$  NMR (100 MHz, DMSO)  $\delta$  161.54, 144.40, 136.46, 133.86, 129.05, 127.73, 124.66, 81.30, 42.95, 20.66. HRMS (ESI): Exact mass calculated for  $\text{C}_{12}\text{H}_{11}\text{Cl}_2\text{NO}_2$   $[\text{M} + \text{H}]^+$ : 272.0245. Found: 272.0455

### **3,4-dichloro-5-hydroxy-1-(4-methoxybenzyl)-1*H*-pyrrol-2(5*H*)-one, Compound 42**

General procedure A.  $^1\text{H}$  NMR (400 MHz, DMSO)  $\delta$  7.30 – 7.10 (m, 3H), 6.90 (t,  $J$  = 5.7 Hz, 2H), 5.29 (d,  $J$  = 9.3 Hz, 1H), 4.66 (d,  $J$  = 15.2 Hz, 1H), 4.23 (d,  $J$  = 15.2 Hz, 1H), 3.73 (s, 3H).  $^{13}\text{C}$  NMR (100 MHz, DMSO)  $\delta$  155.48, 152.58, 138.37, 123.23, 122.82, 118.65, 107.91, 75.21, 49.08, 36.67. HRMS (ESI): Exact mass calculated for  $\text{C}_{12}\text{H}_{11}\text{Cl}_2\text{NO}_3$   $[\text{M} + \text{H}]^+$ : 288.0194. Found: 288.0409

### **3,4-dichloro-5-hydroxy-1-(4-hydroxybenzyl)-1*H*-pyrrol-2(5*H*)-one, Compound 43**

General procedure A.  $^1\text{H}$  NMR (400 MHz, DMSO)  $\delta$  9.37 (s, 1H), 7.18 (d,  $J$  = 9.1 Hz, 1H), 7.08 (d,  $J$  = 8.5 Hz, 2H), 6.71 (d,  $J$  = 8.5 Hz, 2H), 5.26 (d,  $J$  = 8.3 Hz, 1H), 4.63 (d,  $J$  = 15.1 Hz, 1H), 4.15 (d,  $J$  = 15.2 Hz, 1H).  $^{13}\text{C}$  NMR (100 MHz, DMSO)  $\delta$  161.41, 156.71, 144.33, 129.24, 127.00, 124.66, 115.25, 81.07, 42.68. HRMS (ESI): Exact mass calculated for  $\text{C}_{11}\text{H}_9\text{Cl}_2\text{NO}_3$   $[\text{M} + \text{H}]^+$ : 274.0037. Found: 274.0144

### **3,4-dichloro-1-(2-fluorobenzyl)-5-hydroxy-1*H*-pyrrol-2(5*H*)-one, Compound 44**

General procedure A.  $^1\text{H}$  NMR (400 MHz, DMSO)  $\delta$  7.43 – 7.27 (m, 2H), 7.25 – 7.11 (m, 3H), 5.36 (d,  $J$  = 9.4 Hz, 1H), 4.70 (d,  $J$  = 15.8 Hz, 1H), 4.46 (d,  $J$  = 15.8 Hz, 1H).  $^{13}\text{C}$  NMR (100 MHz, DMSO)  $\delta$  161.66, 160.04 (d,  $J_{(\text{C},\text{F})}$  = 245.1 Hz), 144.68, 130.13 (d,  $J_{(\text{C},\text{F})}$  = 4.0 Hz), 129.51 (d,  $J_{(\text{C},\text{F})}$  = 8.1 Hz), 124.55, 124.47 (d,  $J_{(\text{C},\text{F})}$  = 3.5 Hz), 123.63 (d,  $J_{(\text{C},\text{F})}$  = 14.7 Hz), 115.26 (d,  $J_{(\text{C},\text{F})}$  = 21.1 Hz), 81.71, 37.18, 37.16 (d,  $J_{(\text{C},\text{F})}$  = 4.5 Hz). HRMS (ESI): Exact mass calculated for  $\text{C}_{11}\text{H}_8\text{Cl}_2\text{FNO}_2$   $[\text{M} + \text{H}]^+$ : 275.9994. Found: 276.0044

### **3,4-dichloro-1-(3-fluorobenzyl)-5-hydroxy-1*H*-pyrrol-2(5*H*)-one, Compound 45**

General procedure A.  $^1\text{H}$  NMR (400 MHz, DMSO)  $\delta$  7.43 – 7.33 (m, 1H), 7.23 (d,  $J$  = 9.3 Hz, 1H), 7.11 (ddd,  $J$  = 16.9, 8.8, 2.7 Hz, 3H), 5.41 (d,  $J$  = 9.2 Hz, 1H), 4.68 (d,  $J$  = 15.9 Hz, 1H), 4.40 (d,  $J$  = 15.9 Hz, 1H).  $^{13}\text{C}$  NMR (100 MHz, DMSO)  $\delta$  162.24 (d,  $J_{(\text{C},\text{F})}$  = 243.6 Hz), 161.79,



144.60, 139.98 (d,  $J_{(C,F)} = 7.2$  Hz), 130.42 (d,  $J_{(C,F)} = 8.3$  Hz), 124.62, 123.62 (d,  $J_{(C,F)} = 2.7$  Hz), 114.36 (d,  $J_{(C,F)} = 21.8$  Hz), 114.05 (d,  $J_{(C,F)} = 20.9$  Hz), 81.73, 42.94. HRMS (ESI): Exact mass calculated for  $C_{11}H_8Cl_2FNO_2$   $[M + H]^+$ : 275.9994. Found: 275.9965

### **3,4-dichloro-1-(4-fluorobenzyl)-5-hydroxy-1*H*-pyrrol-2(5*H*)-one, Compound 46**

General procedure A.  $^1H$  NMR (400 MHz, DMSO)  $\delta$  7.38 – 7.29 (m, 2H), 7.22 (d,  $J = 9.3$  Hz, 1H), 7.19 – 7.12 (m, 2H), 5.35 (d,  $J = 9.2$  Hz, 1H), 4.67 (d,  $J = 15.5$  Hz, 1H), 4.34 (d,  $J = 15.6$  Hz, 1H).  $^{13}C$  NMR (100 MHz, DMSO)  $\delta$  162.65, 161.46 (d,  $J_{(C,F)} = 243.0$  Hz), 144.49, 133.18 (d,  $J_{(C,F)} = 3.0$  Hz), 129.83 (d,  $J_{(C,F)} = 8.2$  Hz), 124.64, 115.22 (d,  $J_{(C,F)} = 23.4$  Hz), 81.51, 42.66. HRMS (ESI): Exact mass calculated for  $C_{11}H_8Cl_2FNO_2$   $[M + H]^+$ : 275.9994. Found: 276.0105

### **3,4-dichloro-5-hydroxy-1-(3,4,5-trifluorobenzyl)-1*H*-pyrrol-2(5*H*)-one, Compound 47**

General procedure A.  $^1H$  NMR (400 MHz, DMSO)  $\delta$  7.31 – 7.23 (m, 2H), 7.19 (d,  $J = 9.5$  Hz, 1H), 5.47 – 5.42 (m, 1H), 4.62 (d,  $J = 16.2$  Hz, 1H), 4.41 (d,  $J = 16.2$  Hz, 1H).  $^{13}C$  NMR (100 MHz, DMSO)  $\delta$  161.94, 151.37 (m), 148.91 (m), 144.72, 134.60 (m), 124.56, 112.09 (dd,  $J_{(C,F)} = 15.8$  Hz, 5.4 Hz), 81.89, 42.47. HRMS (ESI): Exact mass calculated for  $C_{11}H_6Cl_2F_3NO_2$   $[M + H]^+$ : 311.9805. Found: 311.9908

### **3,4-dichloro-5-hydroxy-1-(naphthalen-1-ylmethyl)-1*H*-pyrrol-2(5*H*)-one, Compound 48**

General procedure A.  $^1H$  NMR (400 MHz, DMSO)  $\delta$  8.17 (d,  $J = 8.2$  Hz, 1H), 7.95 (dd,  $J = 9.6$ , 8.4 Hz, 1H), 7.89 (d,  $J = 7.7$  Hz, 1H), 7.64 – 7.40 (m, 4H), 7.25 (d,  $J = 9.4$  Hz, 1H), 5.27 (d,  $J = 10.6$  Hz, 1H), 5.23 (d,  $J = 4.1$  Hz, 1H), 4.75 (d,  $J = 15.7$  Hz, 1H).  $^{13}C$  NMR (100 MHz, DMSO)  $\delta$  161.51, 144.71, 133.35, 131.90, 130.71, 128.61, 128.15, 126.53, 126.31, 125.96, 125.45, 124.55, 123.14, 81.39, 40.88. HRMS (ESI): Exact mass calculated for  $C_{15}H_{11}Cl_2NO_2$   $[M + H]^+$ : 308.0245. Found: 308.0365

### **3,4-dichloro-5-hydroxy-1-(pyridin-2-ylmethyl)-1*H*-pyrrol-2(5*H*)-one, Compound 49**

General procedure A.  $^1H$  NMR (400 MHz,  $CDCl_3$ )  $\delta$  8.46 (d,  $J = 5.0$  Hz, 1H), 7.80 (td,  $J = 7.7$ , 1.7 Hz, 1H), 7.47 (d,  $J = 7.8$  Hz, 1H), 7.32 (dd,  $J = 7.4$ , 5.1 Hz, 1H), 5.50 (s, 1H), 5.04 (d,  $J = 16.0$  Hz, 1H), 4.64 (d,  $J = 16.0$  Hz, 1H).  $^{13}C$  NMR (100 MHz,  $CDCl_3$ )  $\delta$  163.17, 155.25, 147.93,

145.39, 138.88, 125.81, 123.57, 123.47, 83.45, 46.46. HRMS (ESI): Exact mass calculated for  $C_{10}H_8Cl_2N_2O_2$   $[M + H]^+$ : 259.0041. Found: 259.0025

**3,4-dichloro-5-hydroxy-1-(pyridin-3-ylmethyl)-1*H*-pyrrol-2(5*H*)-one, Compound 50**

General procedure A.  $^1H$  NMR (400 MHz, DMSO)  $\delta$  8.54 (s, 1H), 8.48 (d,  $J = 3.9$  Hz, 1H), 7.71 (d,  $J = 7.9$  Hz, 1H), 7.36 (dd,  $J = 7.8, 4.8$  Hz, 1H), 7.25 (d,  $J = 9.2$  Hz, 1H), 5.43 (d,  $J = 8.8$  Hz, 1H), 4.67 (d,  $J = 15.8$  Hz, 1H), 4.44 (d,  $J = 15.8$  Hz, 1H).  $^{13}C$  NMR (100 MHz, DMSO)  $\delta$  161.80, 149.03, 148.46, 144.61, 135.68, 132.71, 124.58, 123.57, 81.84, 41.28. HRMS (ESI): Exact mass calculated for  $C_{10}H_8Cl_2N_2O_2$   $[M + H]^+$ : 259.0041. Found: 259.0009

**3,4-dichloro-5-hydroxy-1-(pyridin-4-ylmethyl)-1*H*-pyrrol-2(5*H*)-one, Compound 51**

General procedure A.  $^1H$  NMR (400 MHz, DMSO)  $\delta$  8.53 (d,  $J = 6.0$  Hz, 2H), 7.34 (d,  $J = 5.7$  Hz, 2H), 7.29 (s, 1H), 5.47 (s, 1H), 4.67 (d,  $J = 16.7$  Hz, 1H), 4.48 (d,  $J = 16.7$  Hz, 1H).  $^{13}C$  NMR (100 MHz, DMSO)  $\delta$  161.99, 149.17, 146.80, 144.77, 124.60, 122.58, 82.05, 42.67. HRMS (ESI): Exact mass calculated for  $C_{10}H_8Cl_2N_2O_2$   $[M + H]^+$ : 259.0041. Found: 259.0214

**Spectra and titers:  
<sup>1</sup>H NMR, <sup>13</sup>C NMR, MRM transitions, VEU titer**

## Compound ID: 1

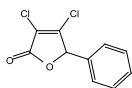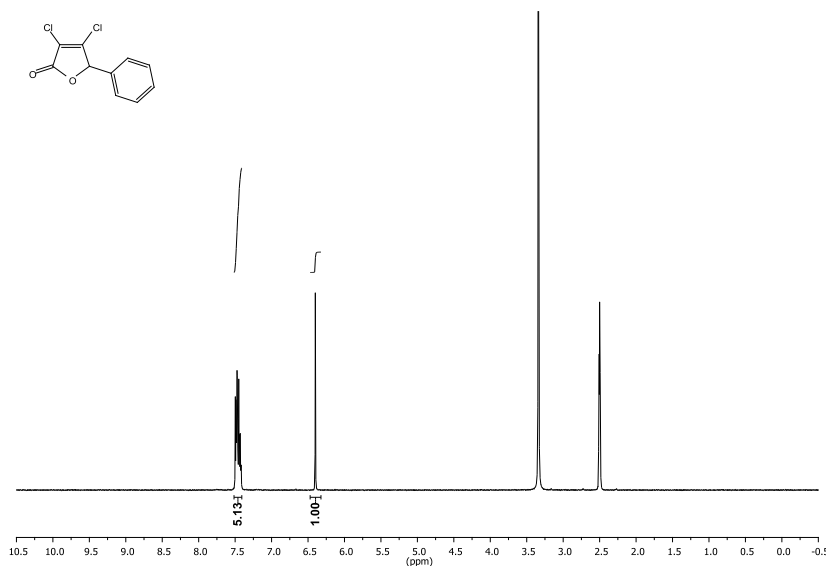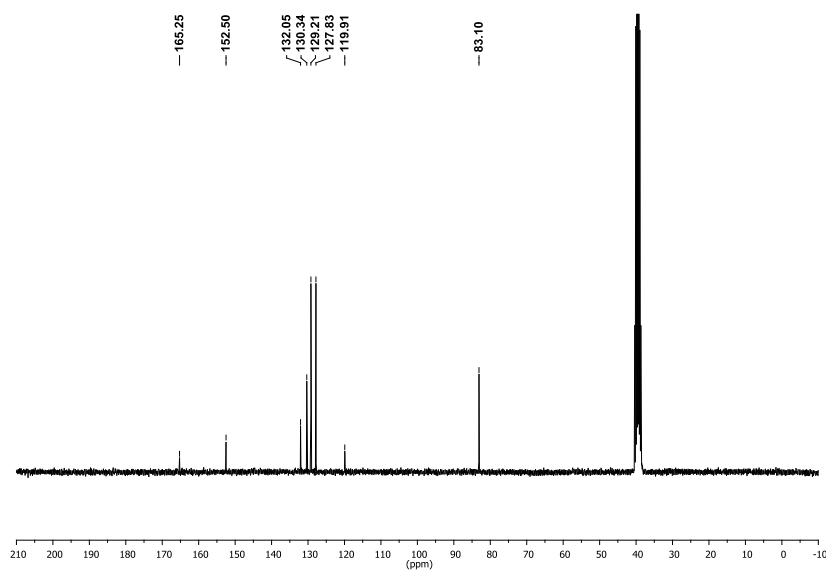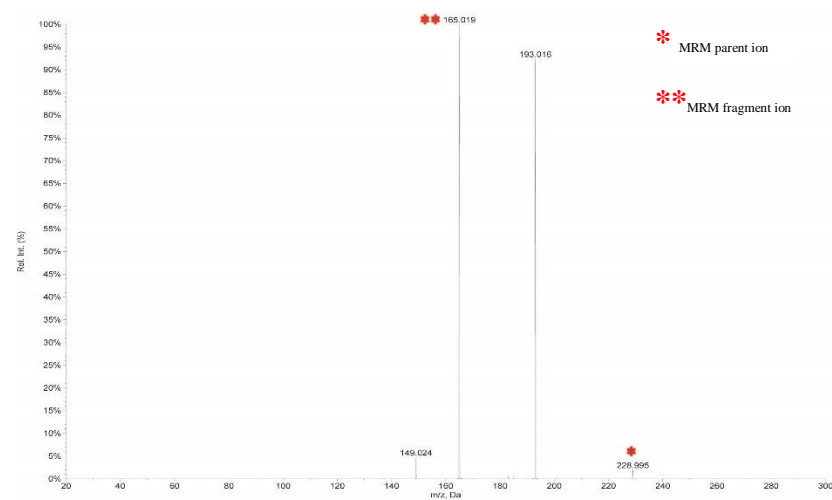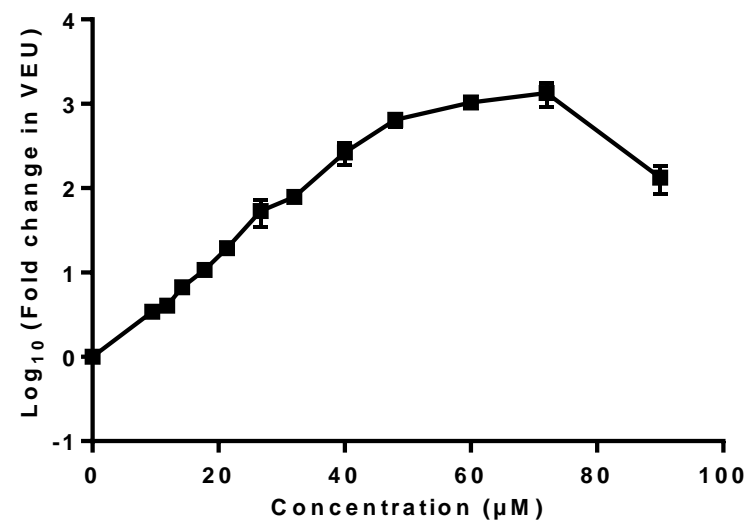

Compound ID: 2

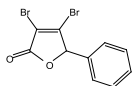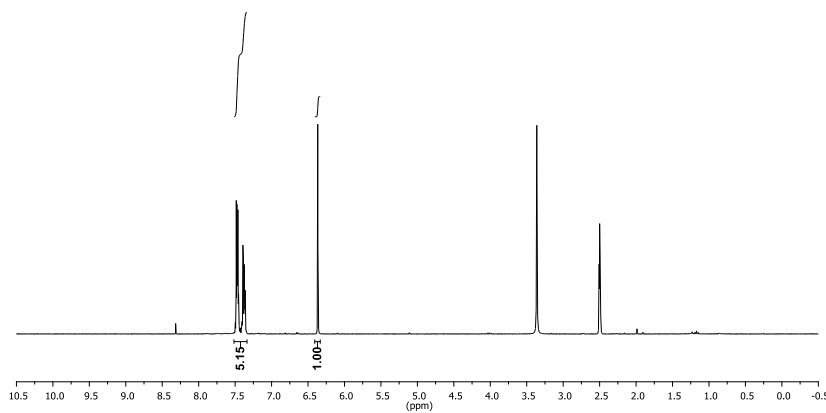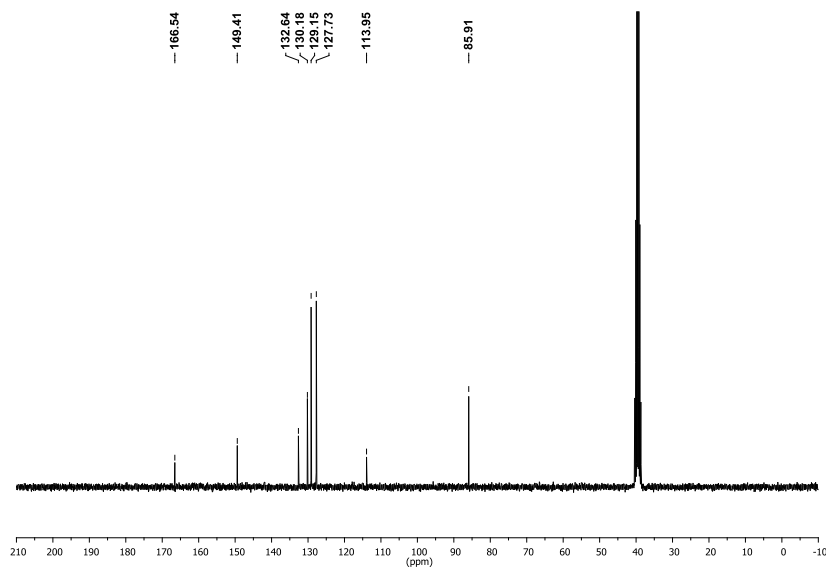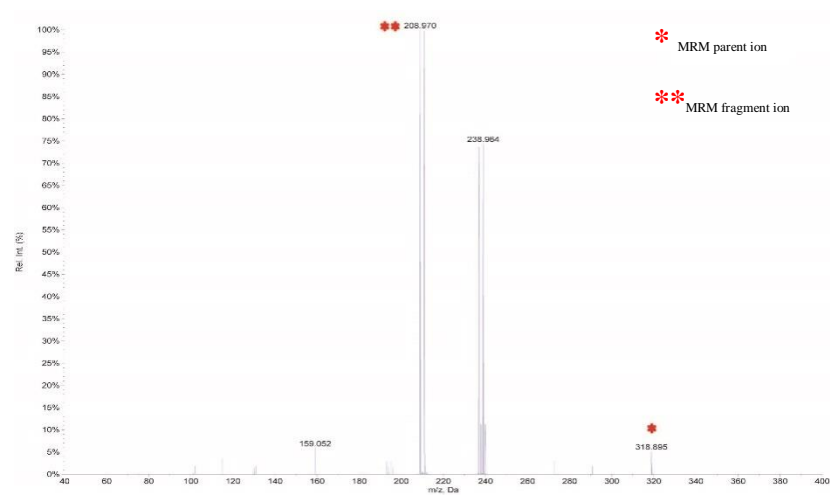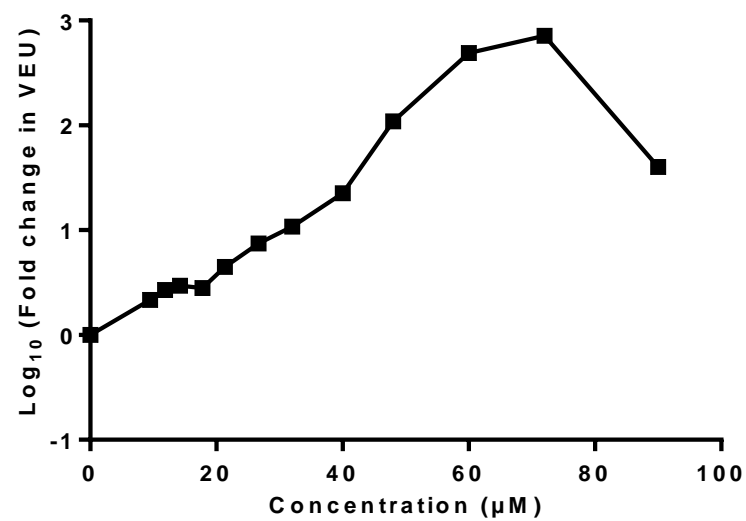

## Compound ID: 3

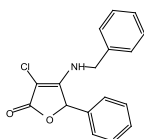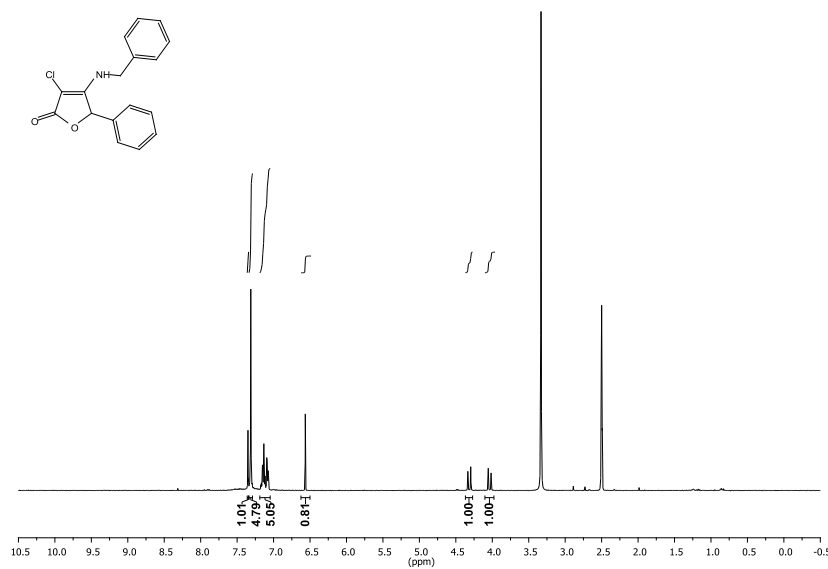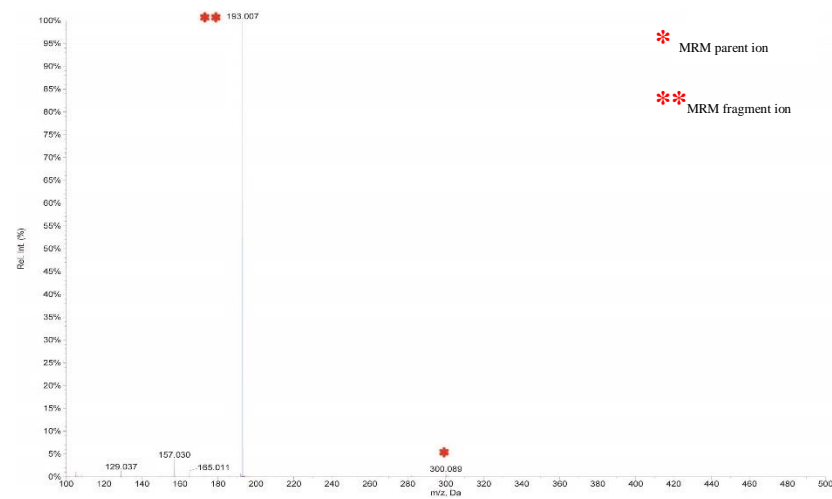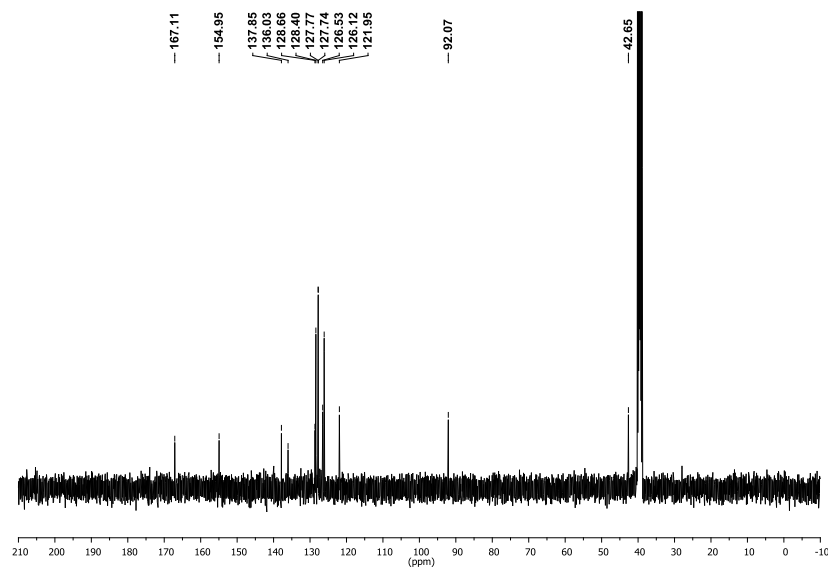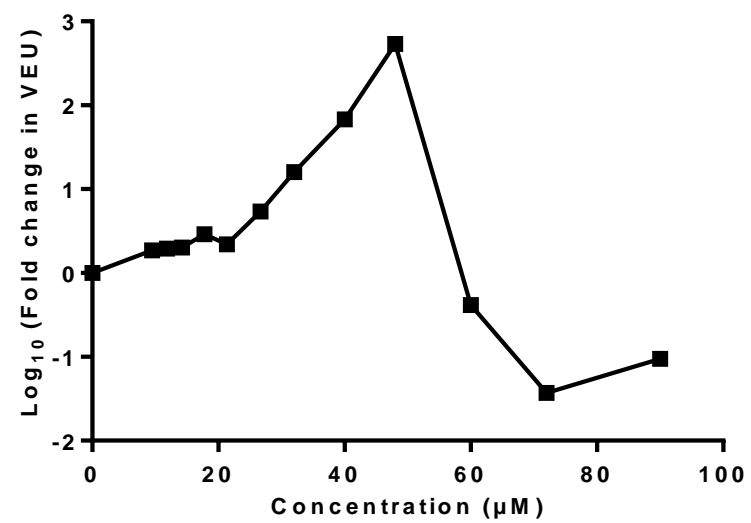

## Compound ID: 4

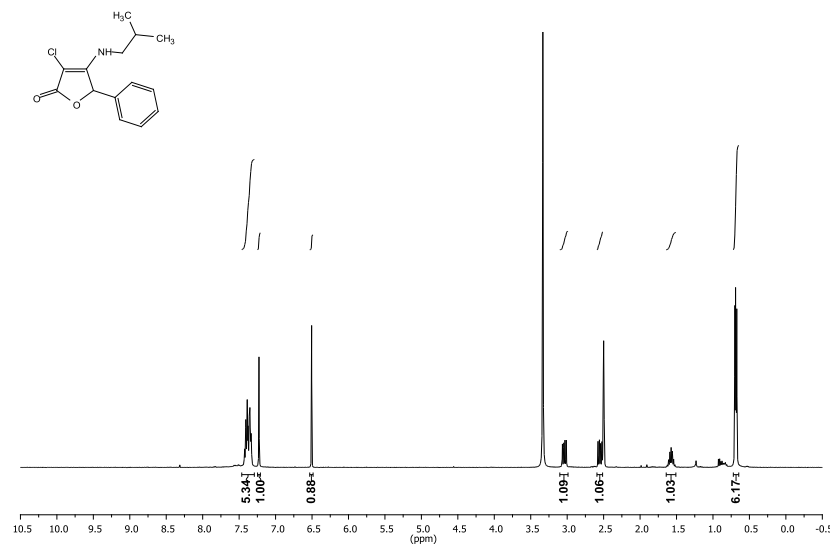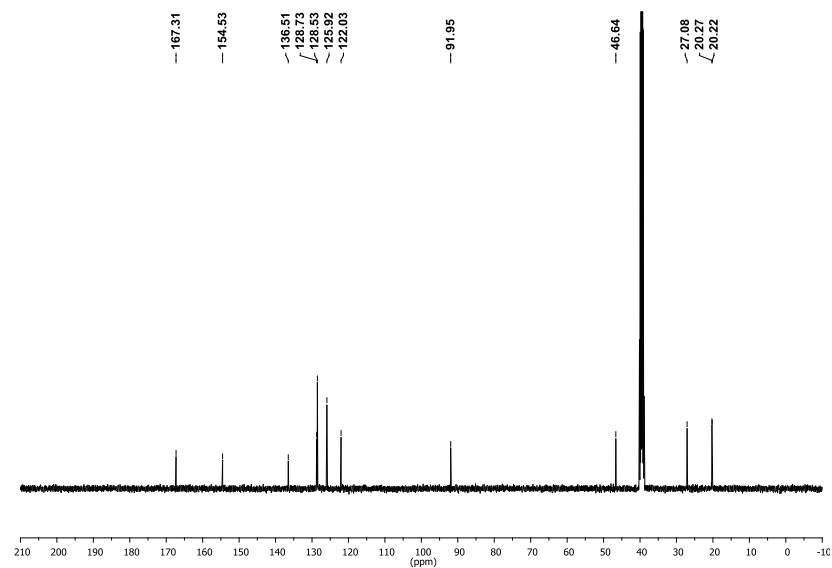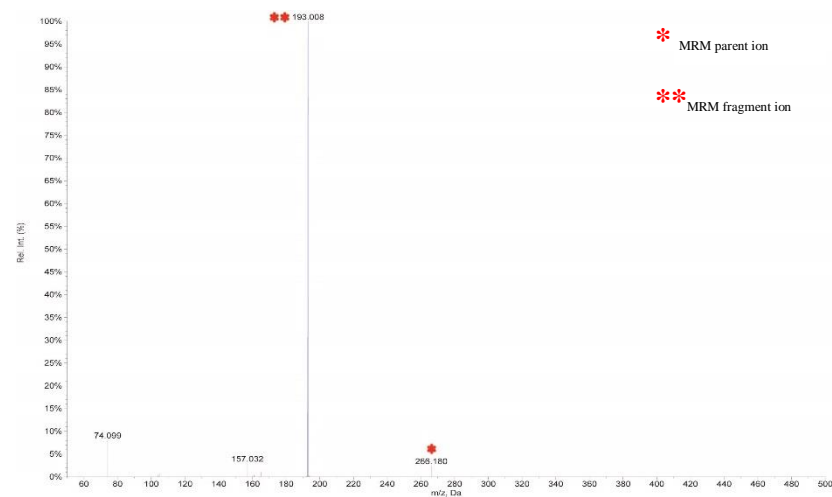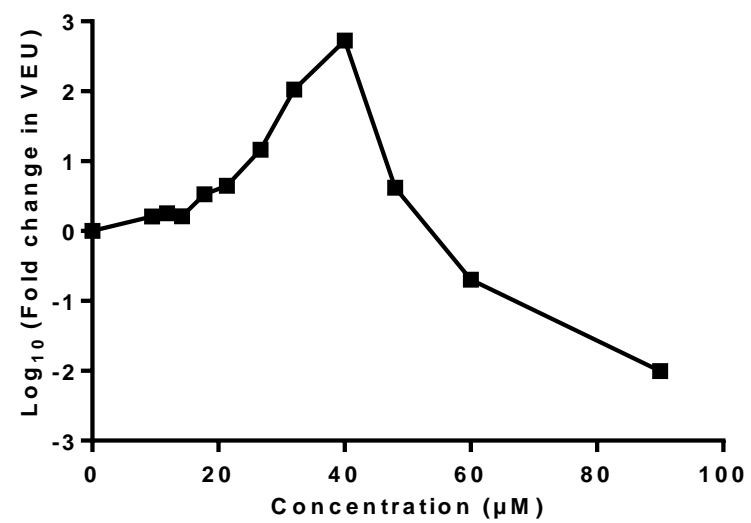

## Compound ID: 5

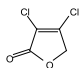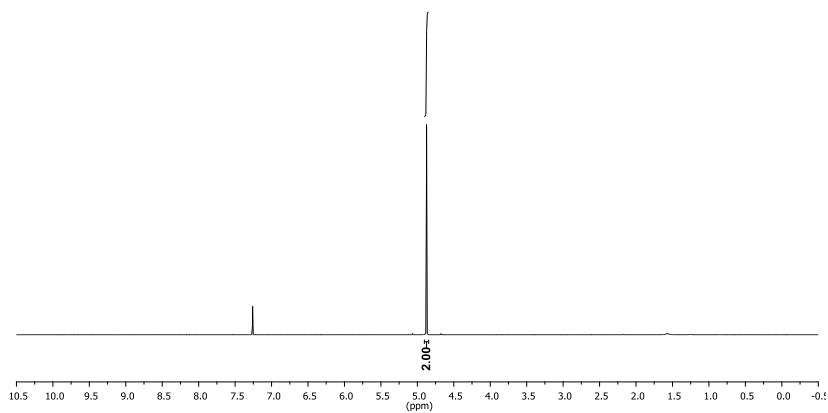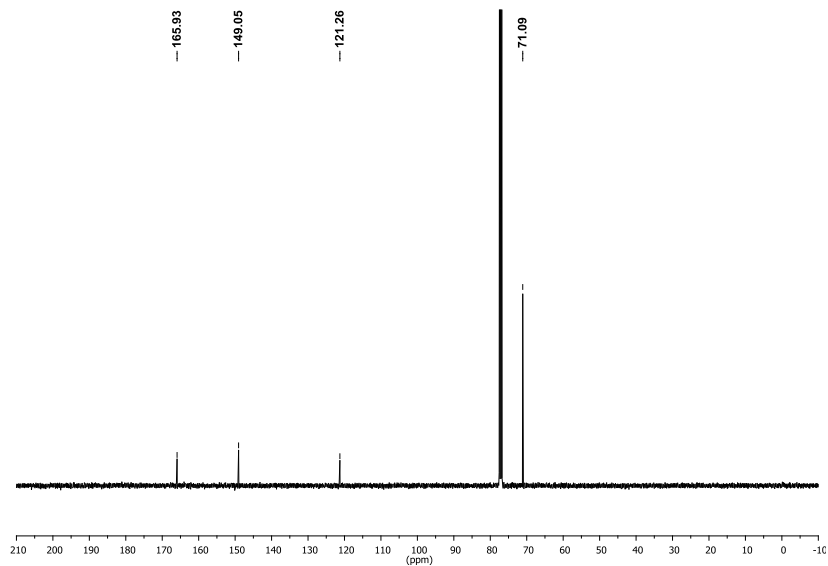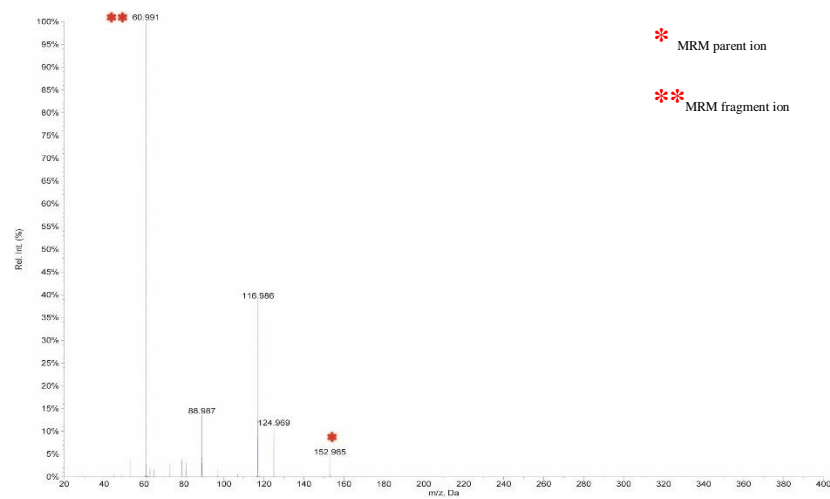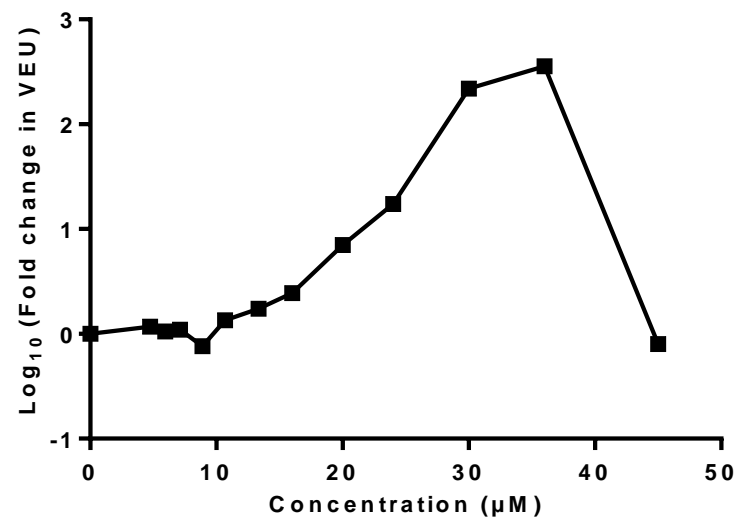



## Compound ID: 6

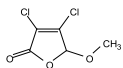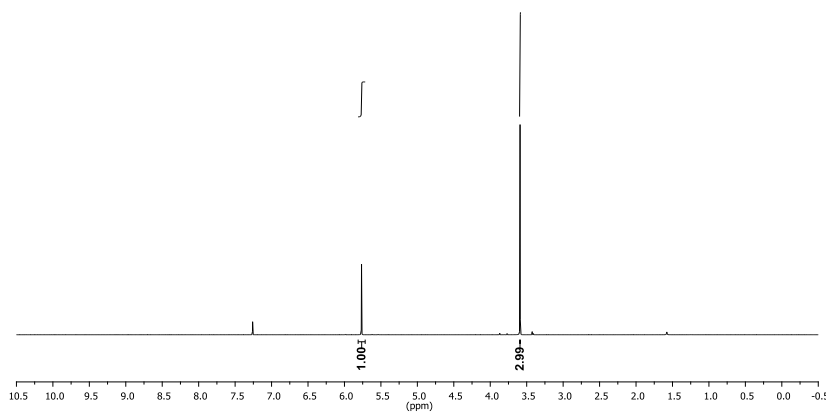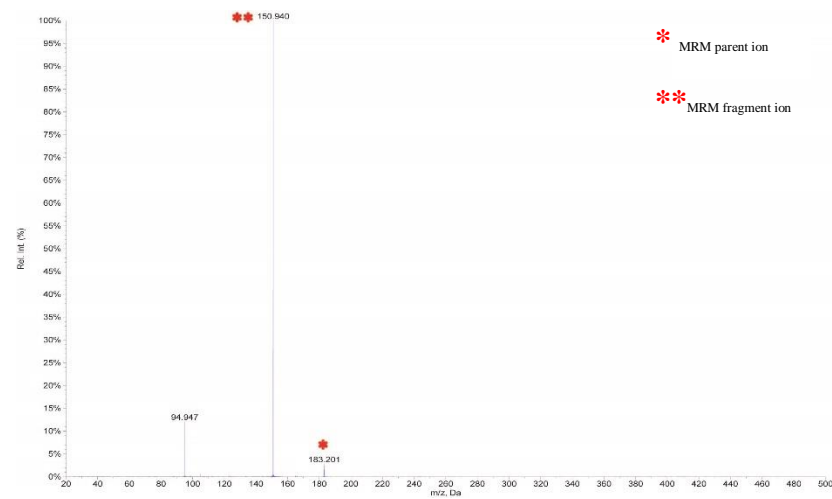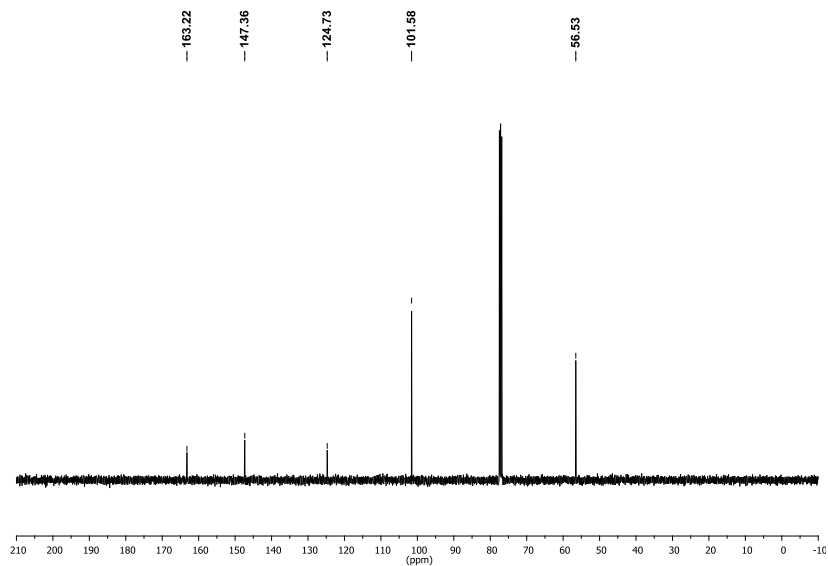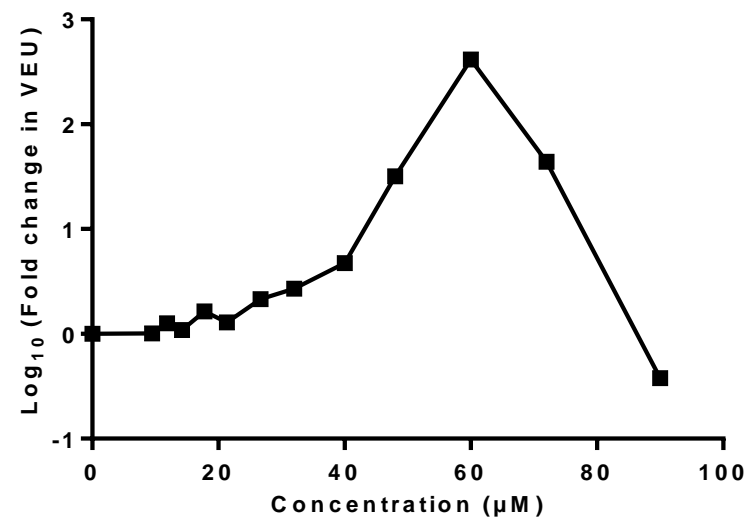

Compound ID: 7

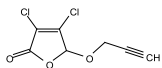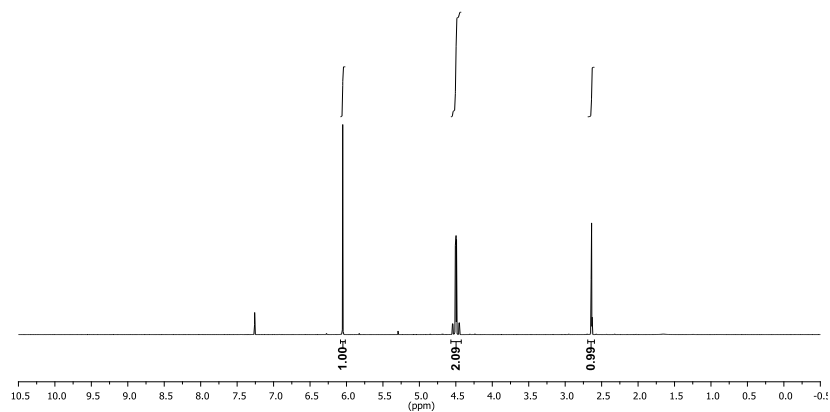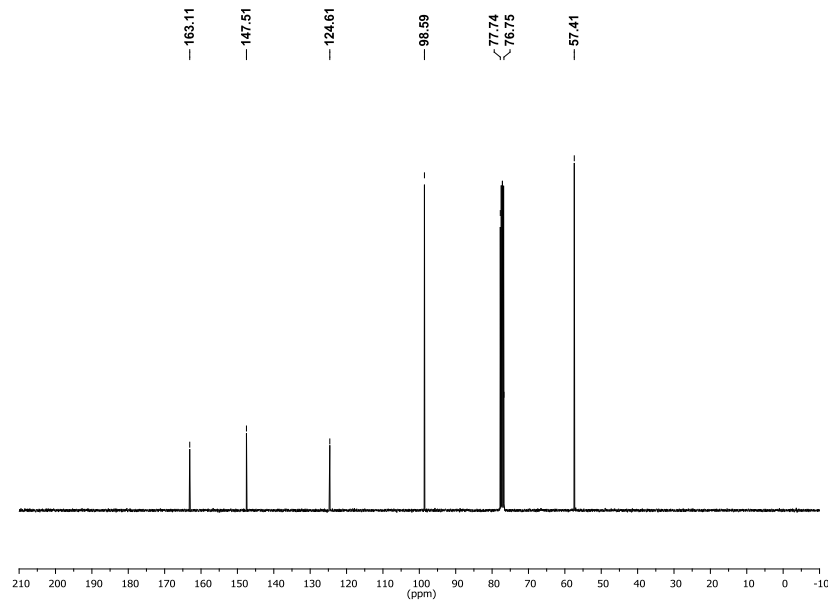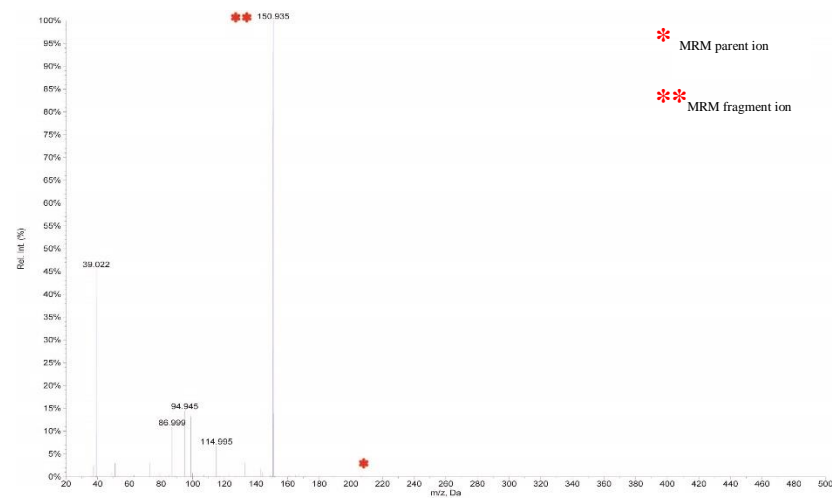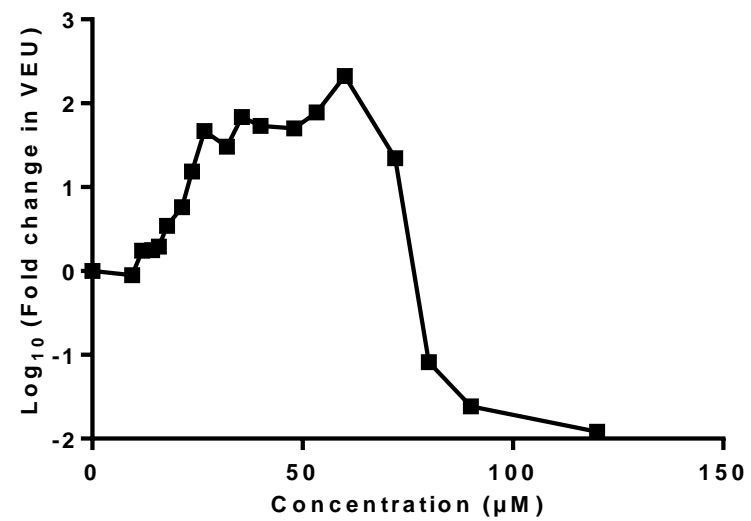

Compound ID: 8

Compound purchased from a commercial supplier.

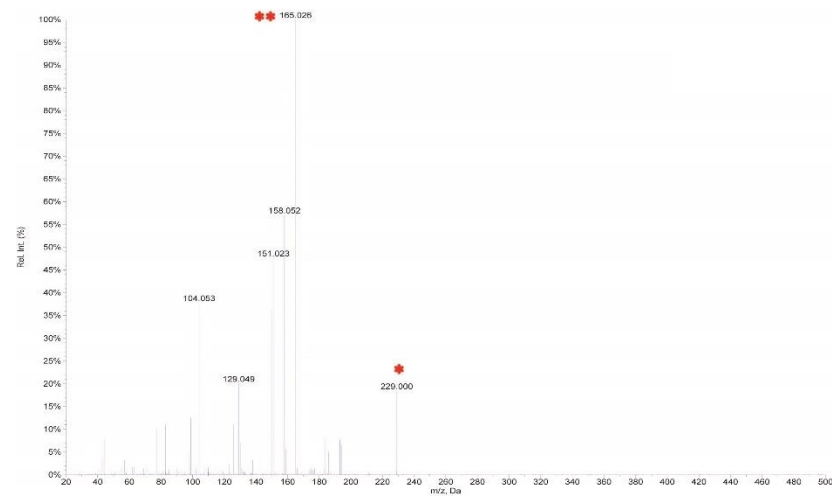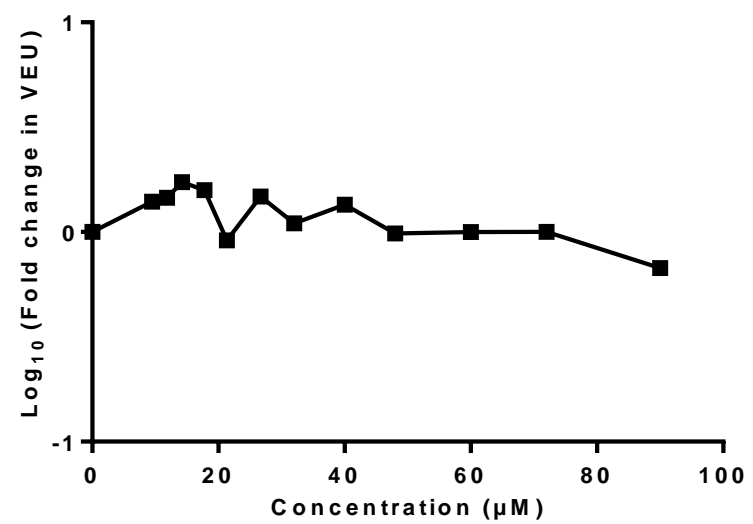

## Compound ID: 9

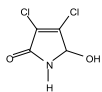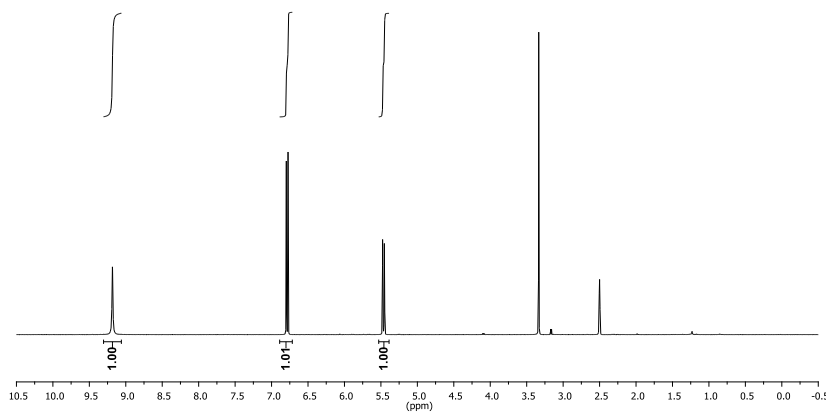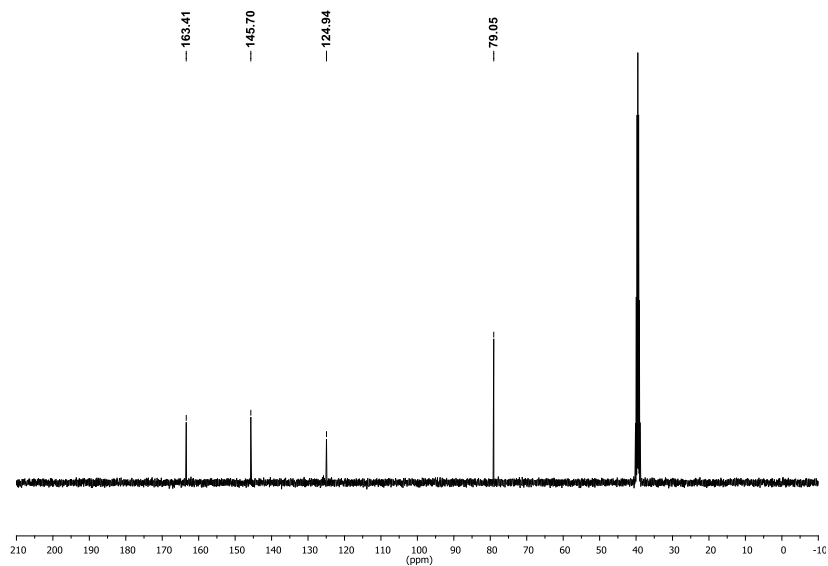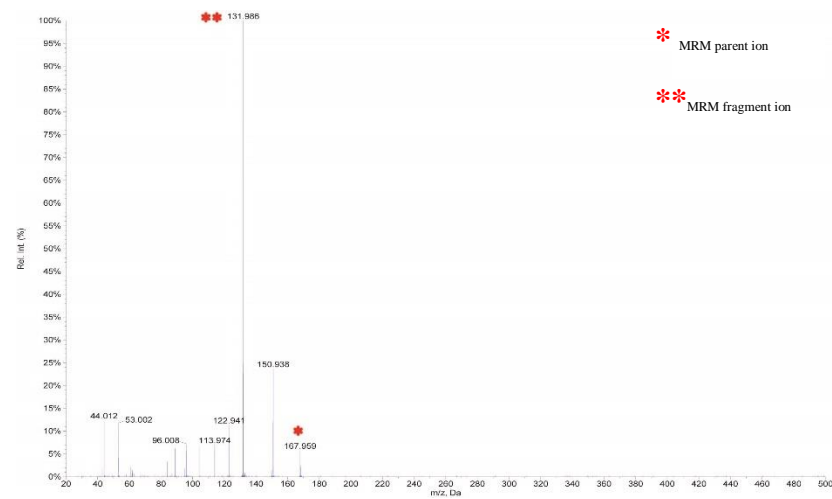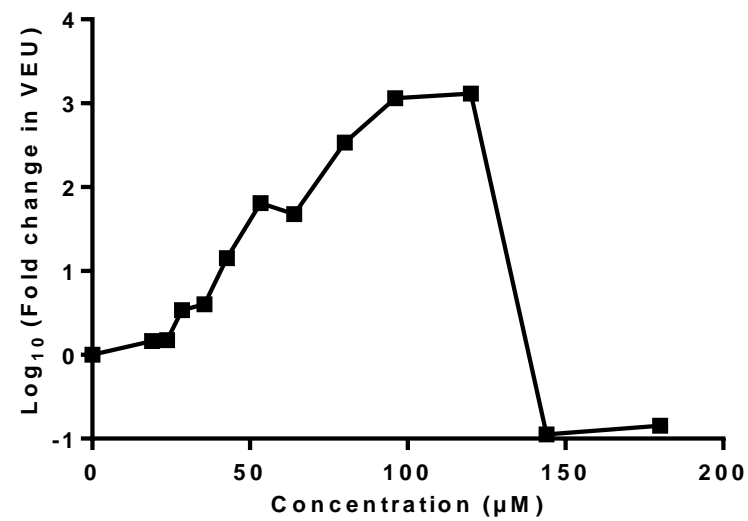

Compound ID: 10

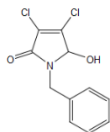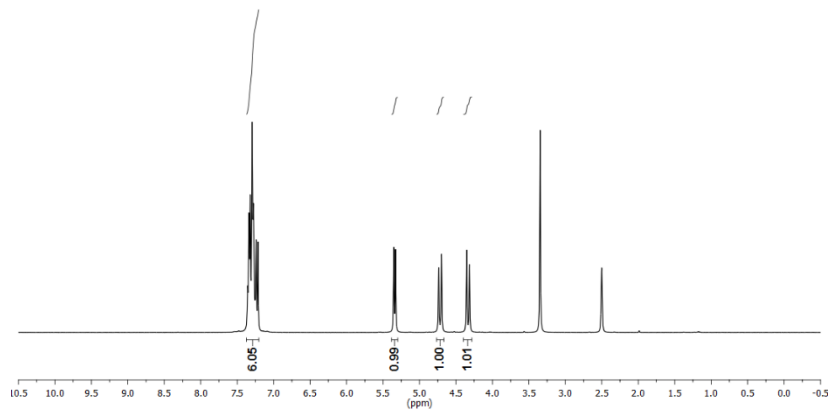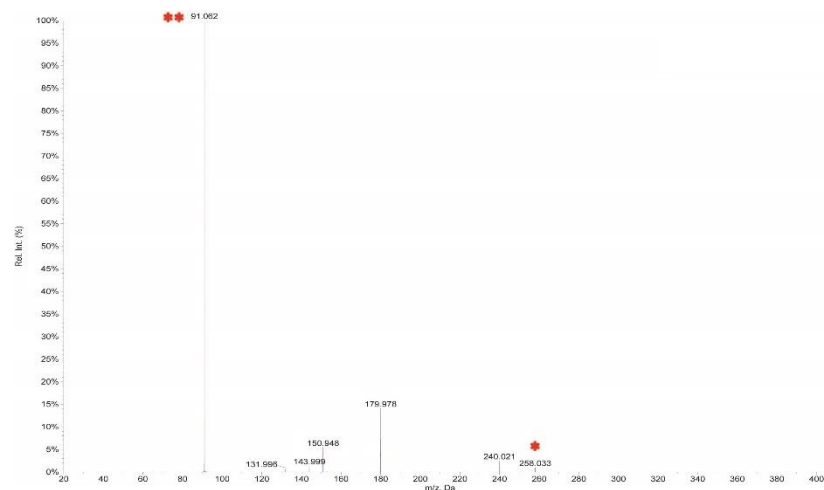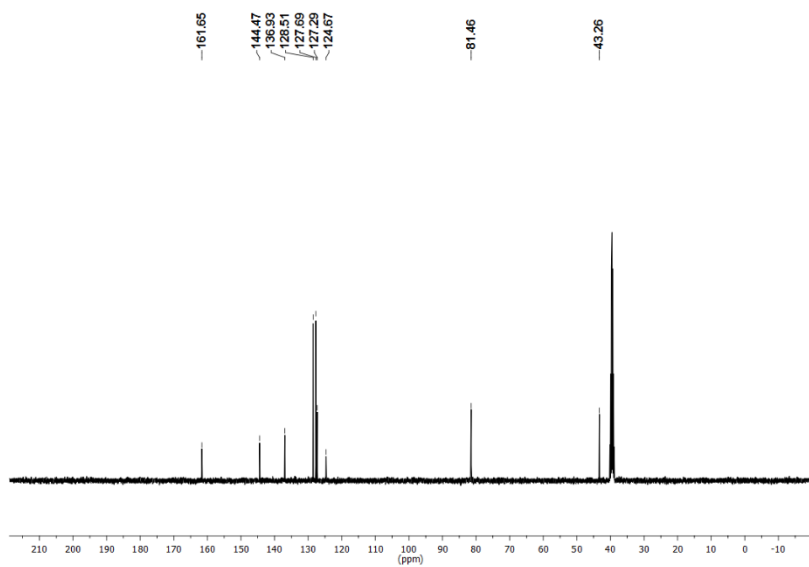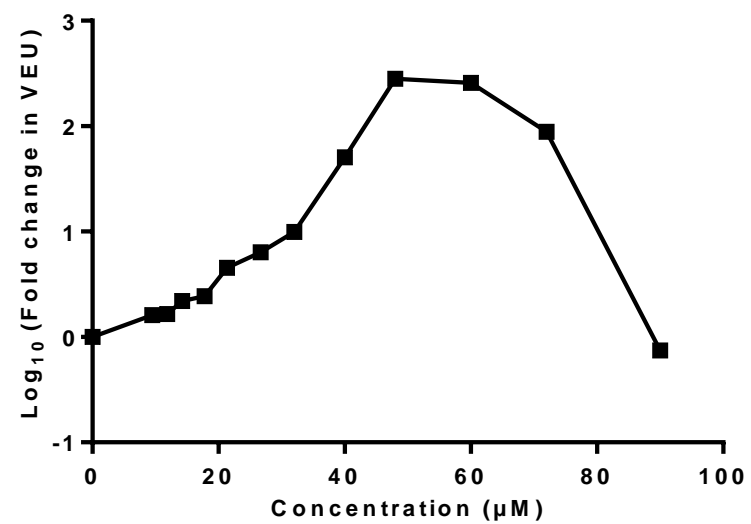

## Compound ID: 11

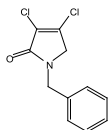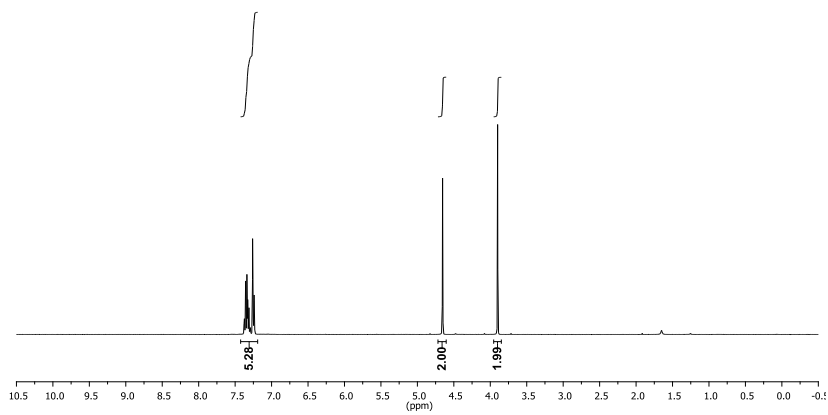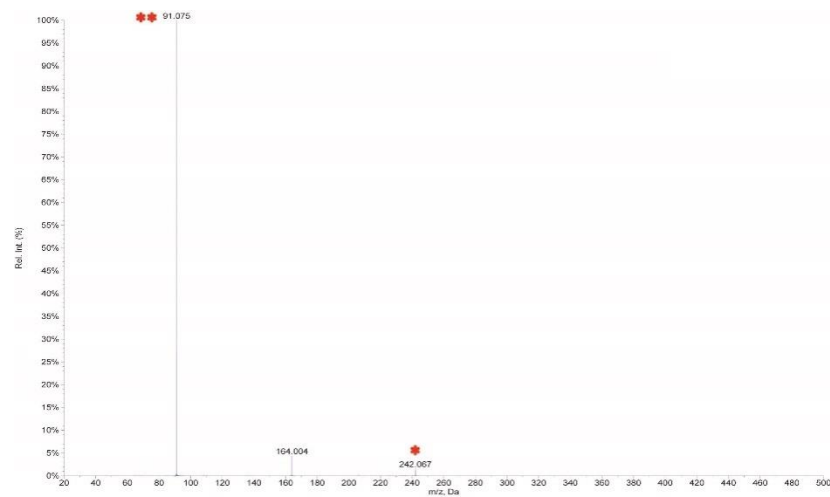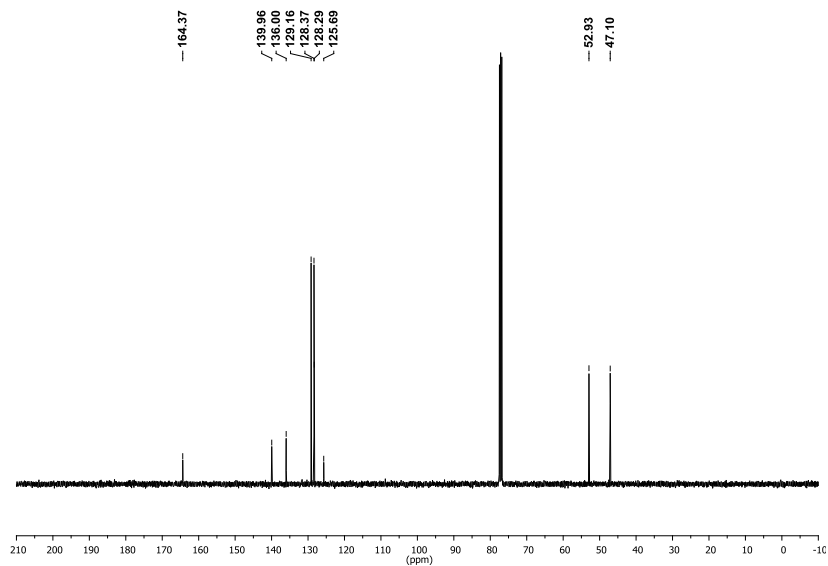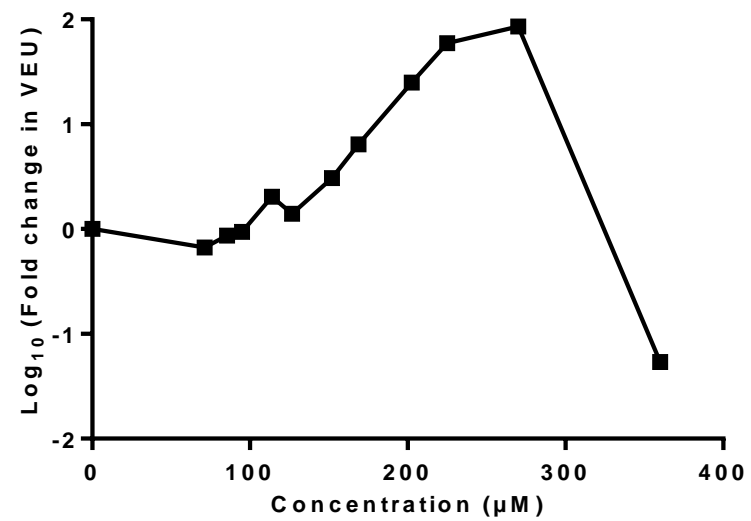

## Compound ID: 12

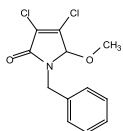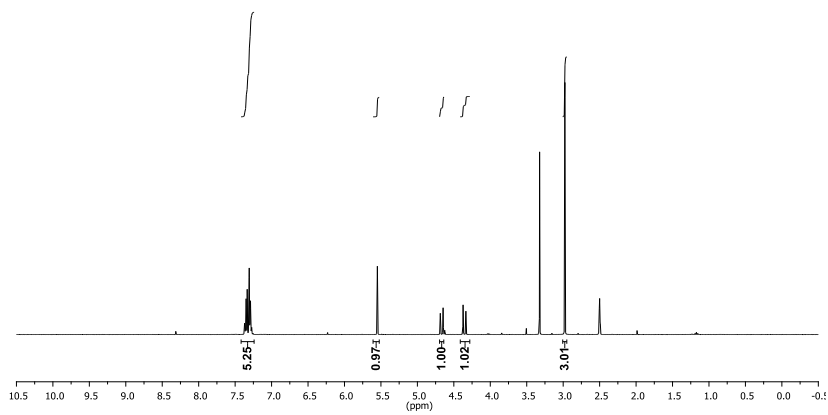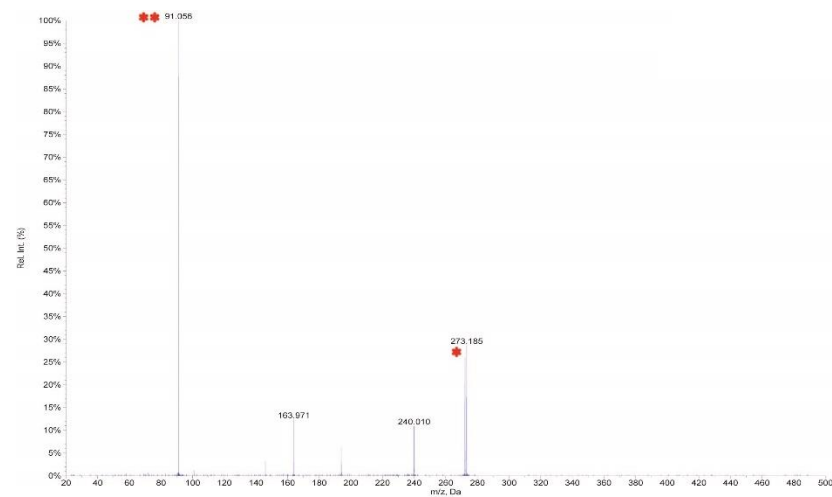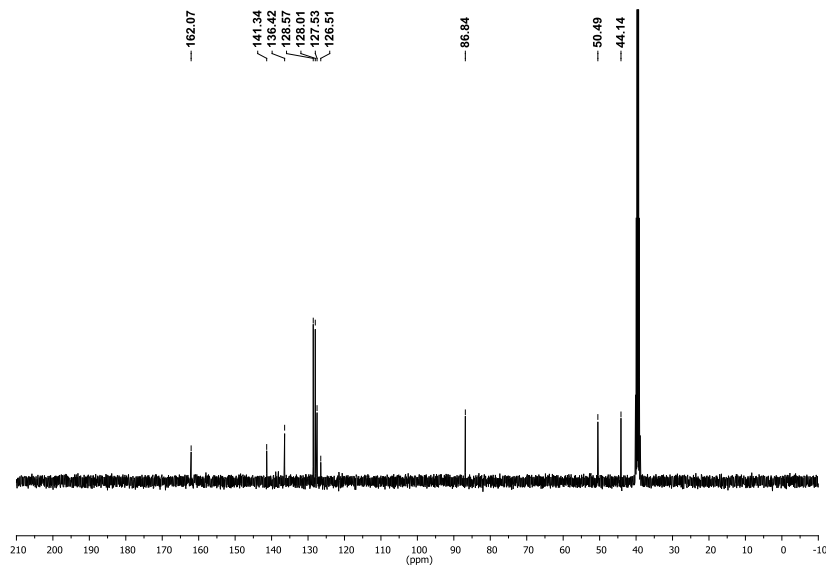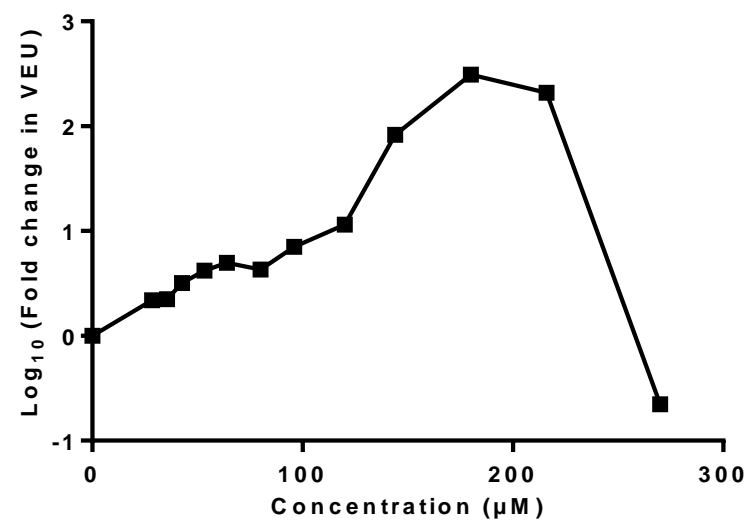

## Compound ID: 13

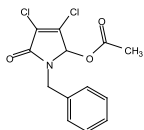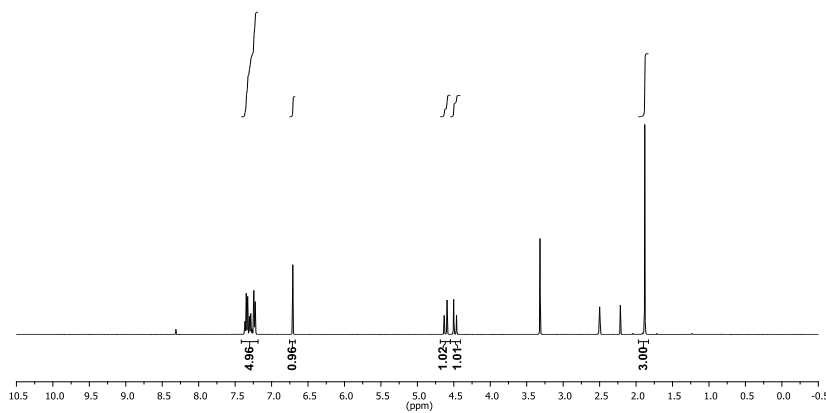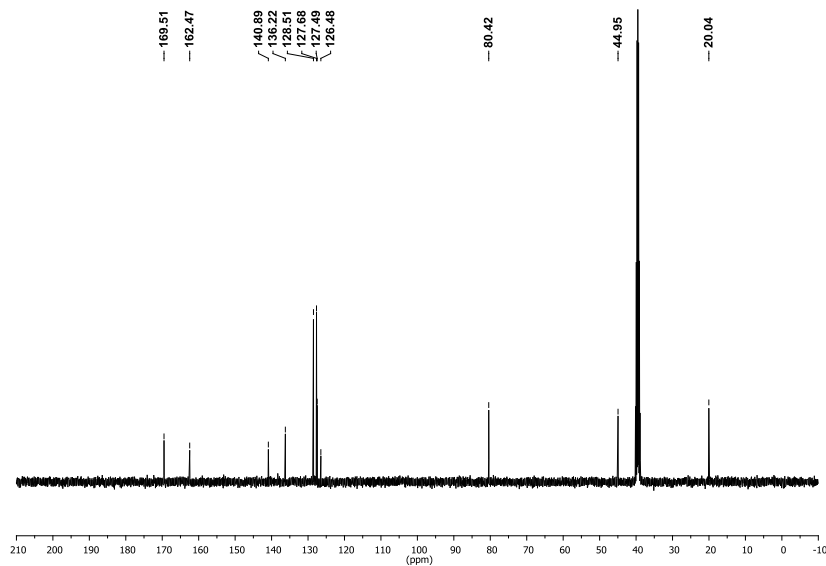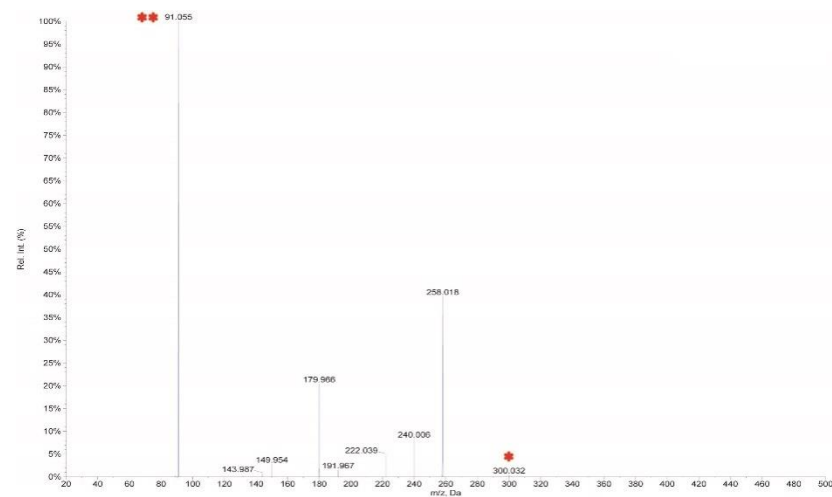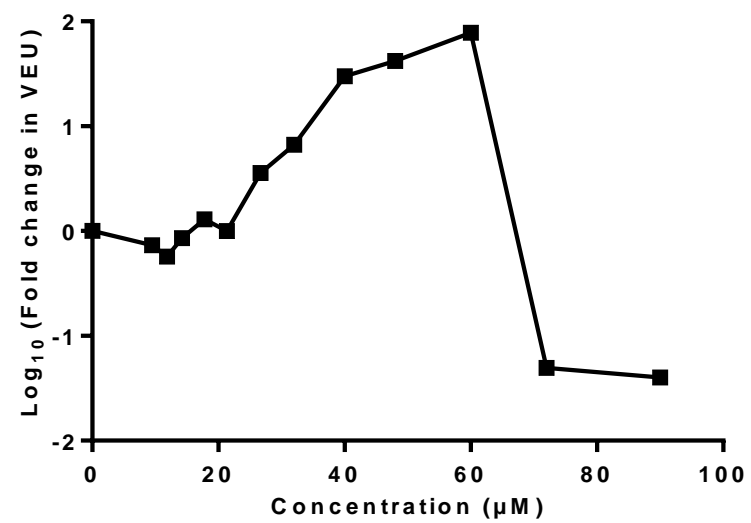



## Compound ID: 14

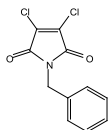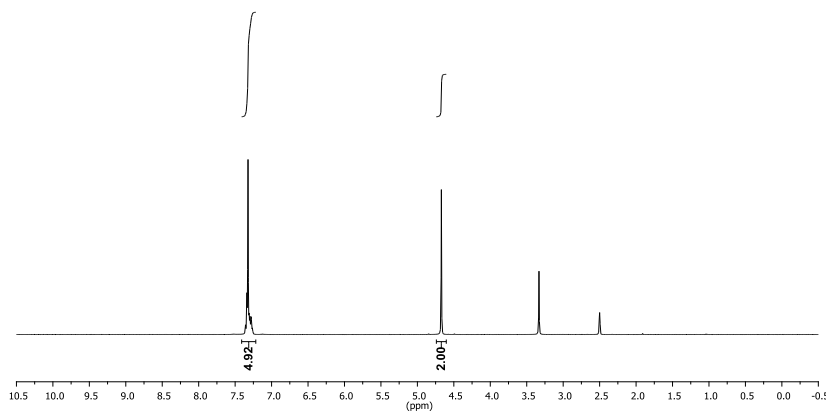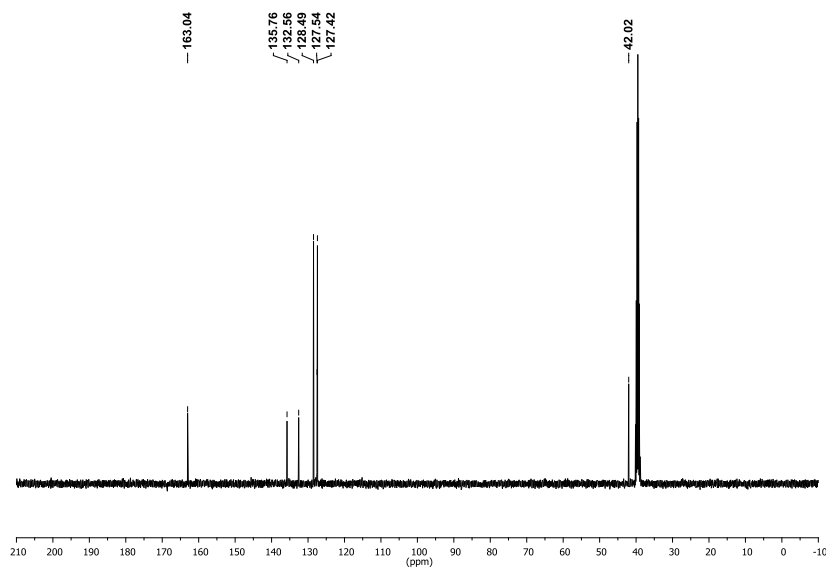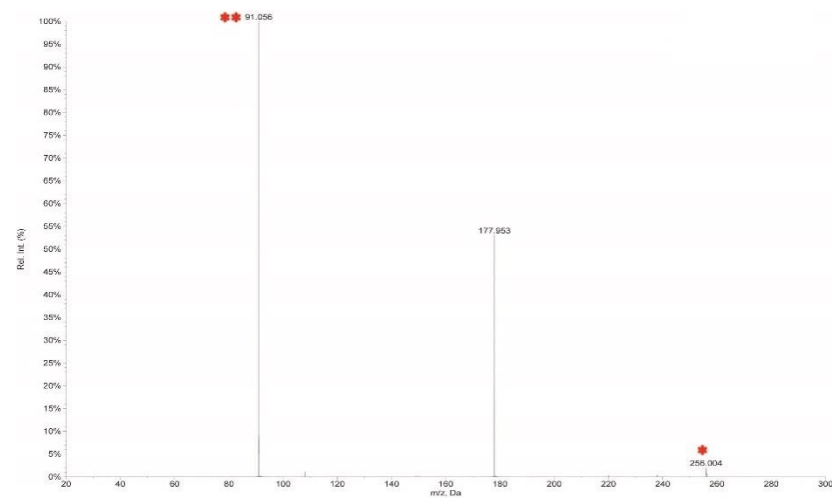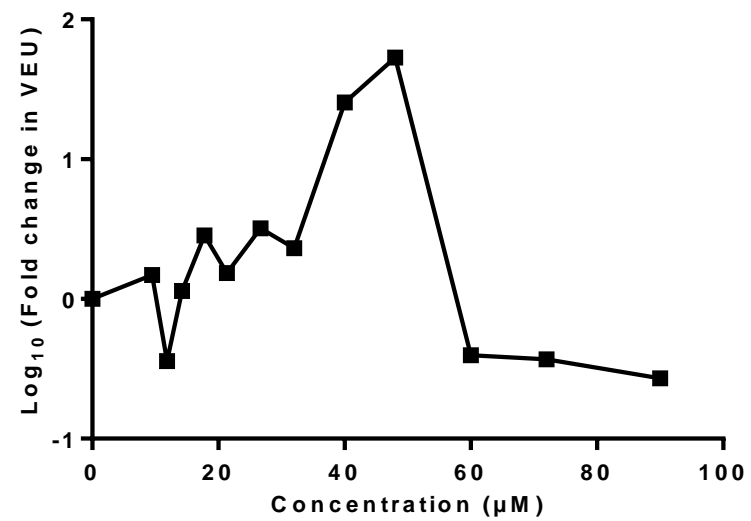

## Compound ID: 15

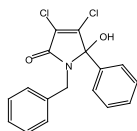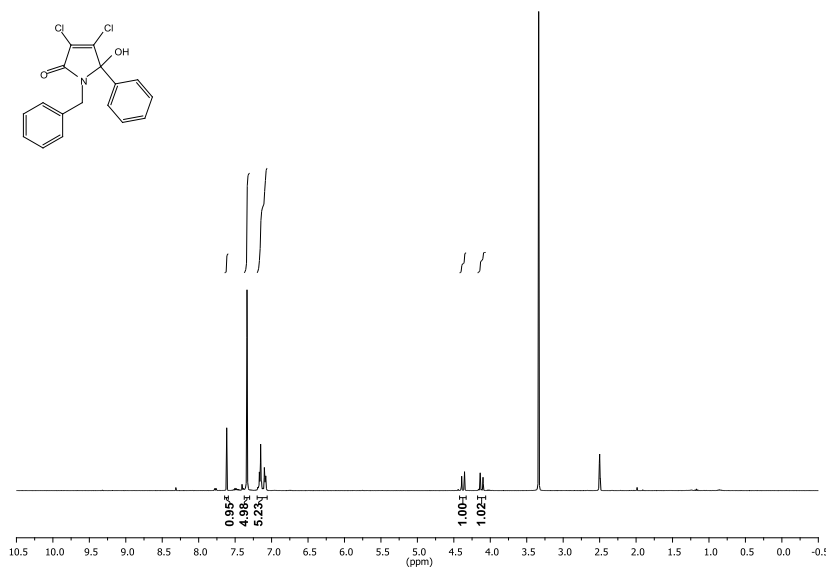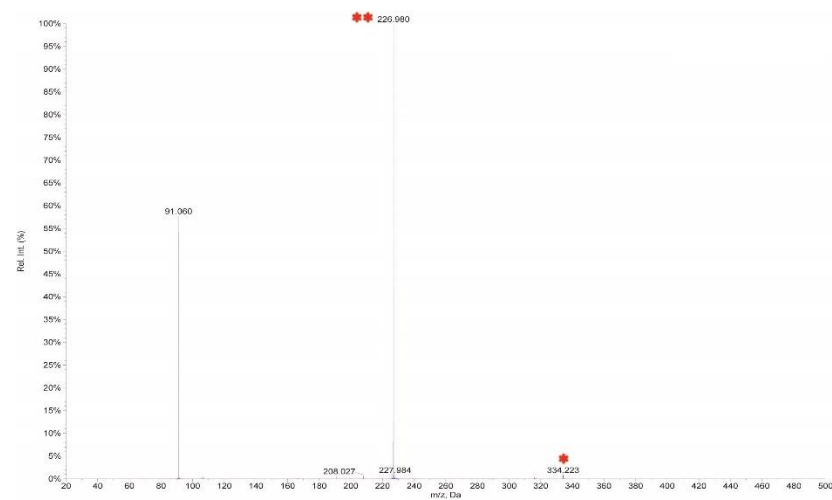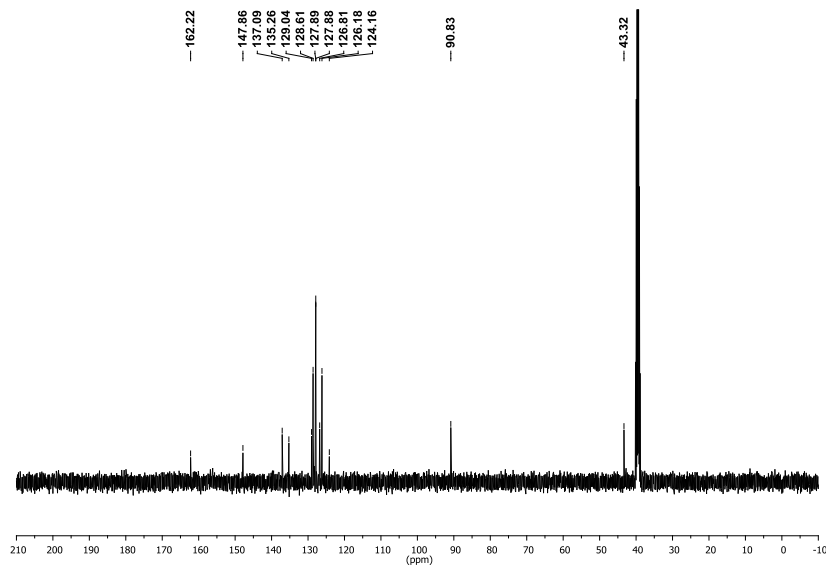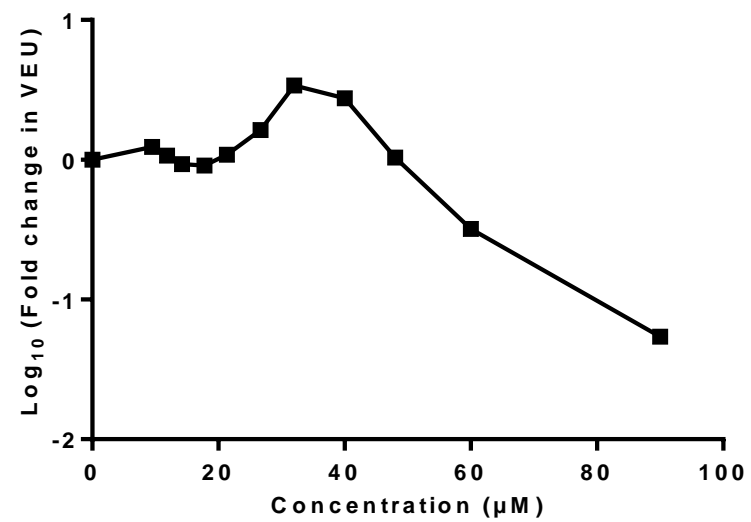

Compound ID: 16

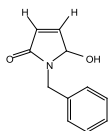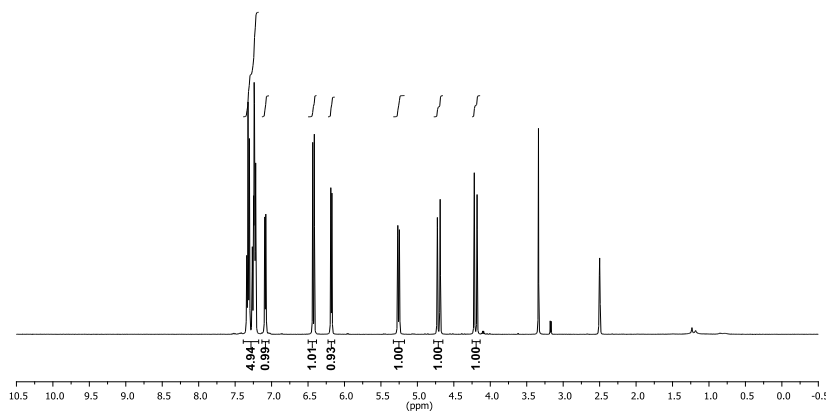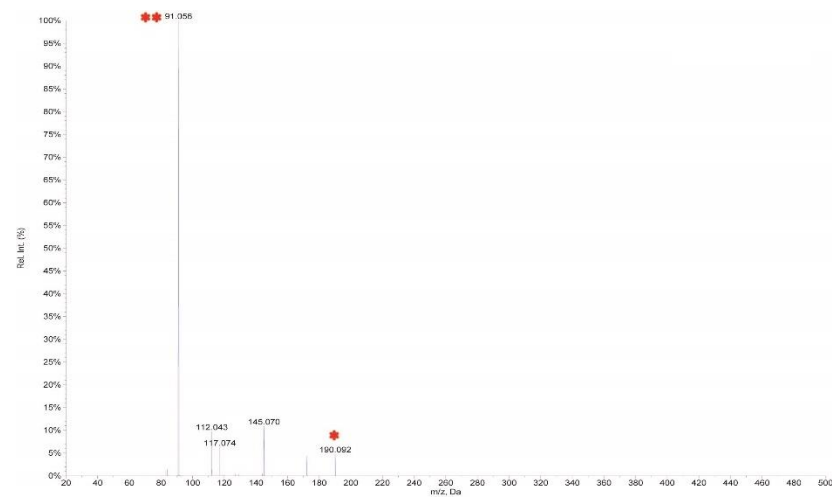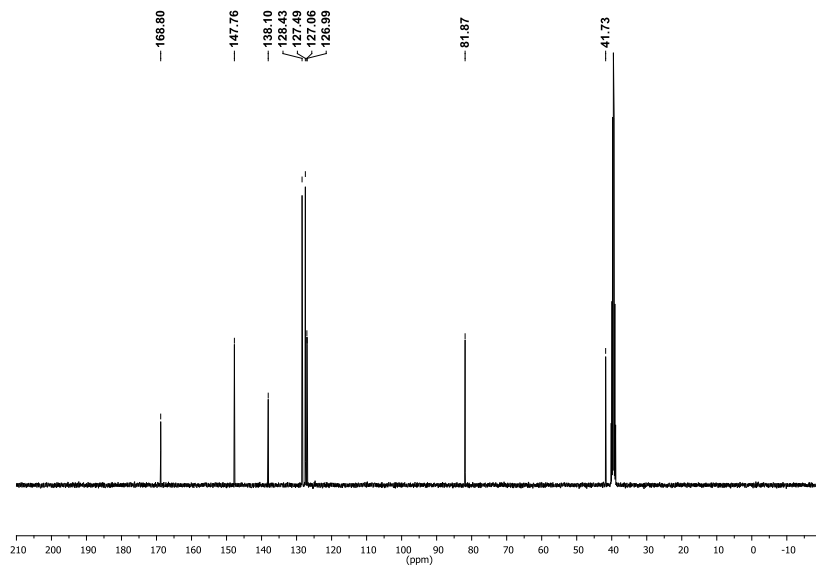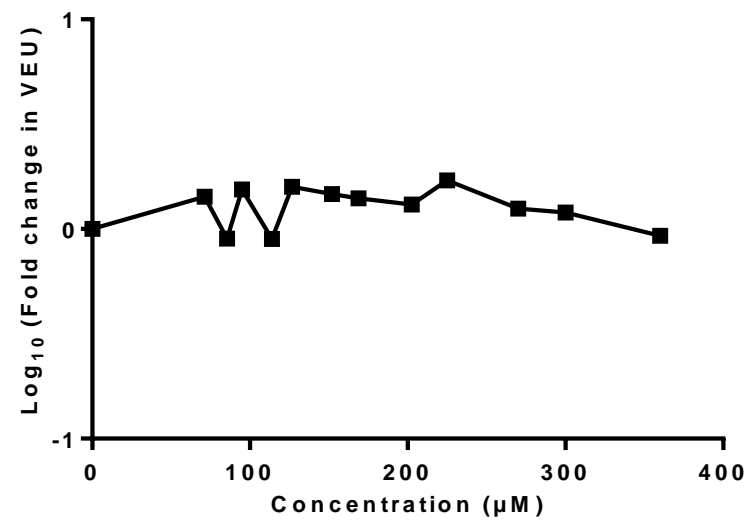

## Compound ID: 17

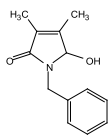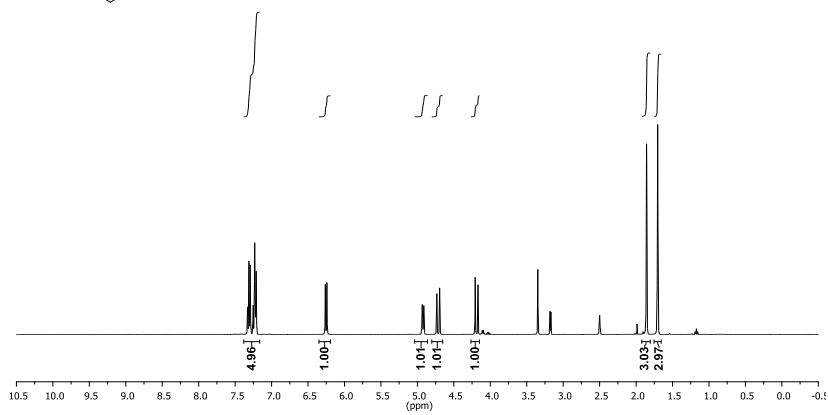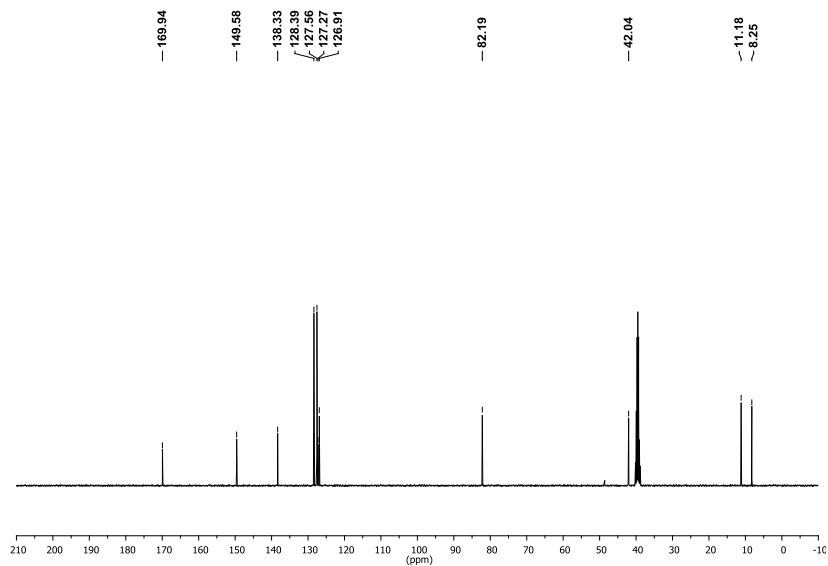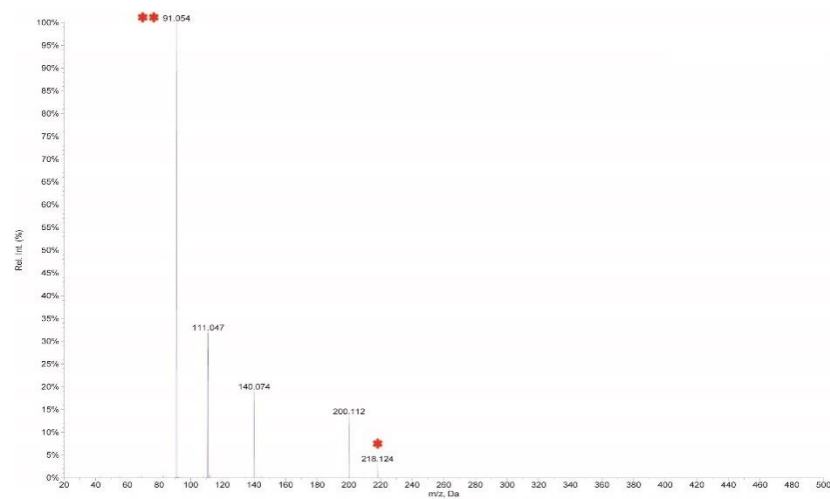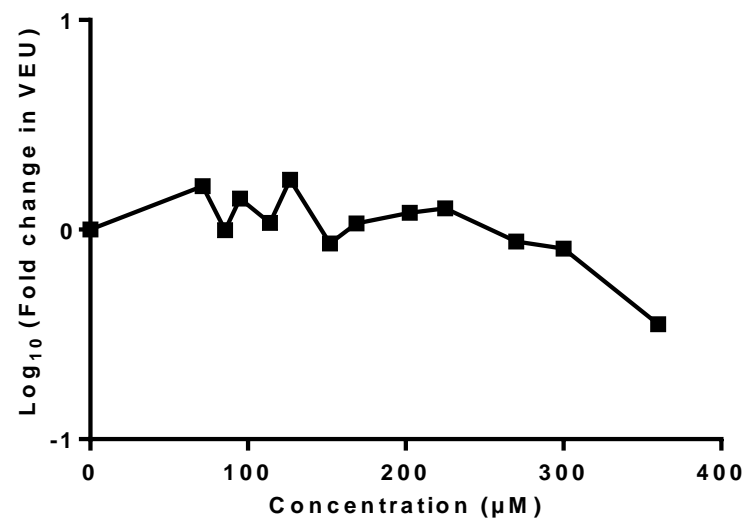

## Compound ID: 18

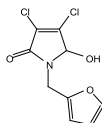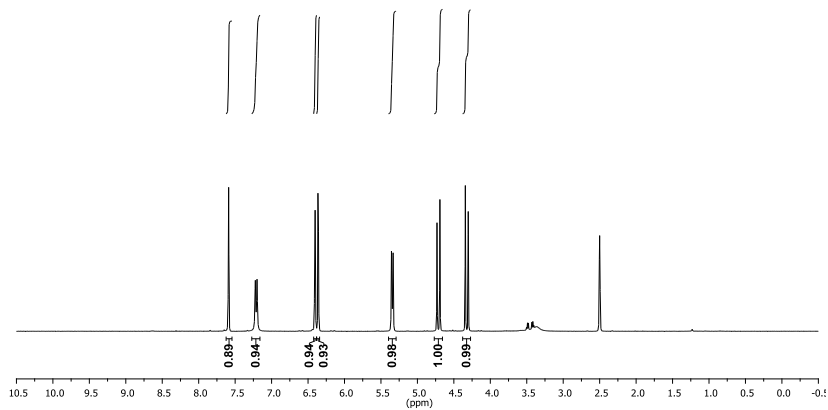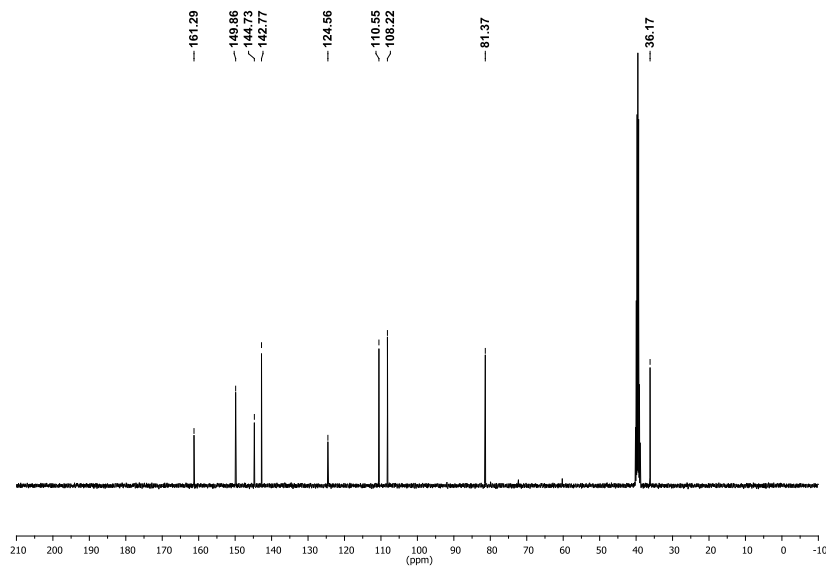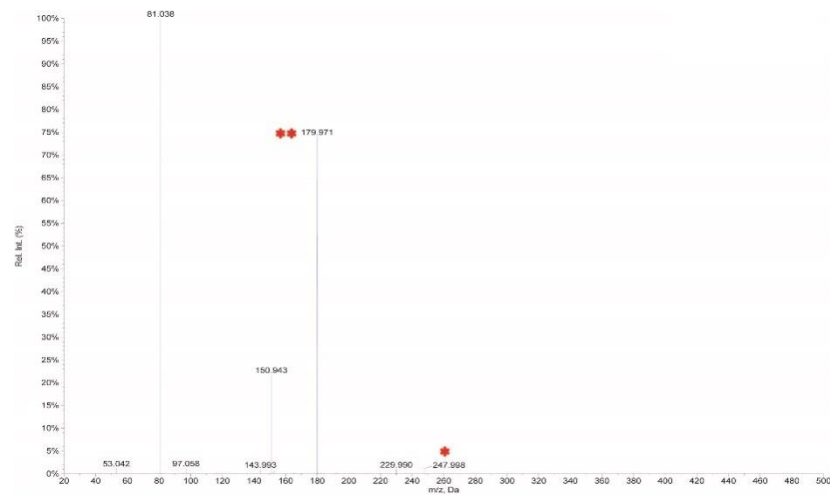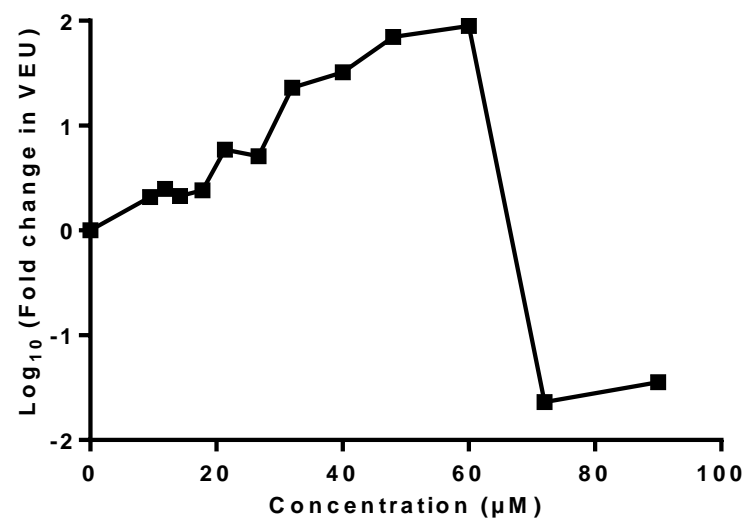



## Compound ID: 20

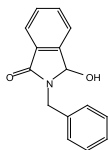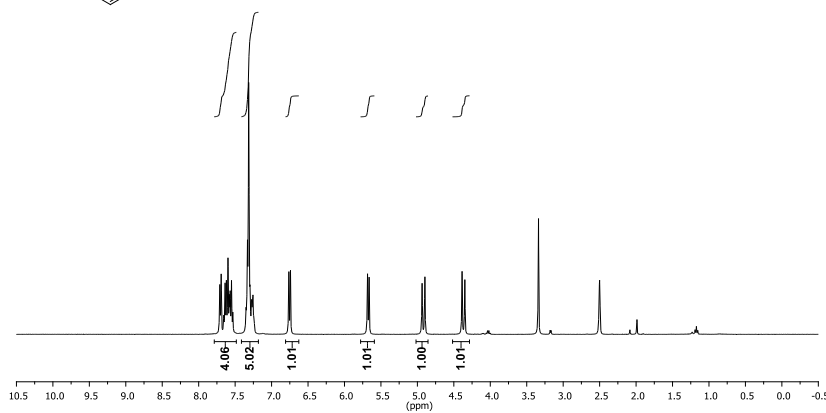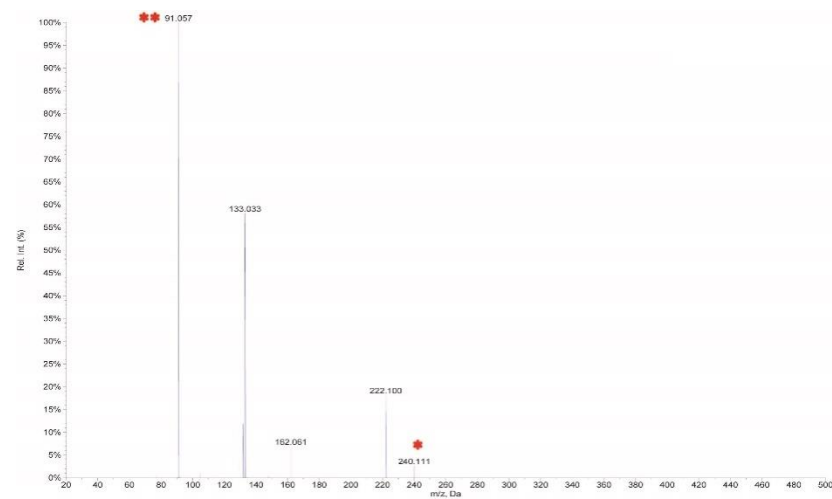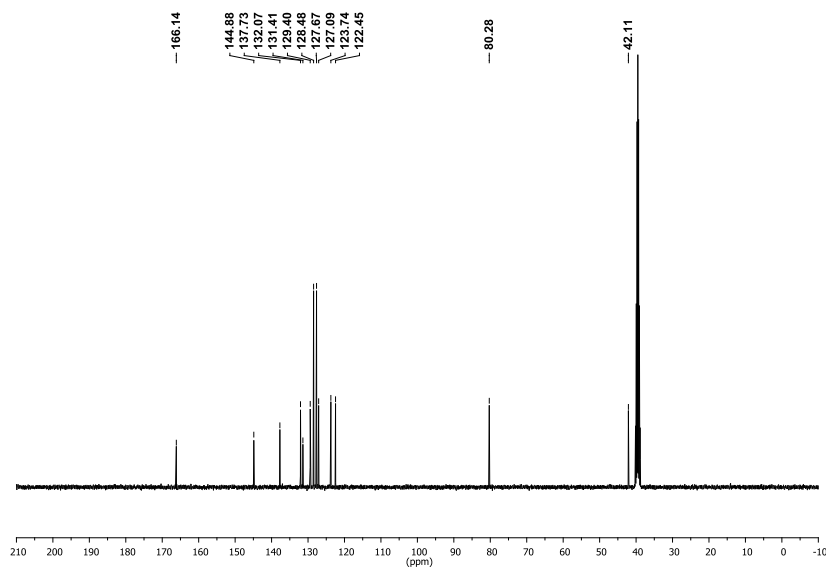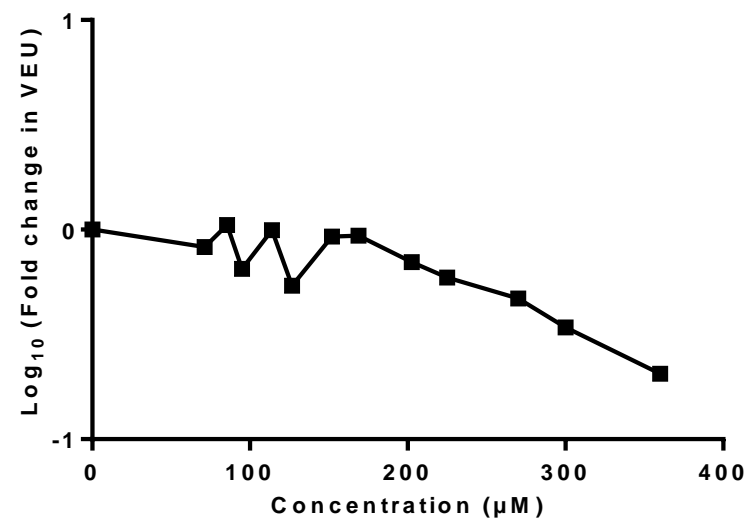

## Compound ID: 21

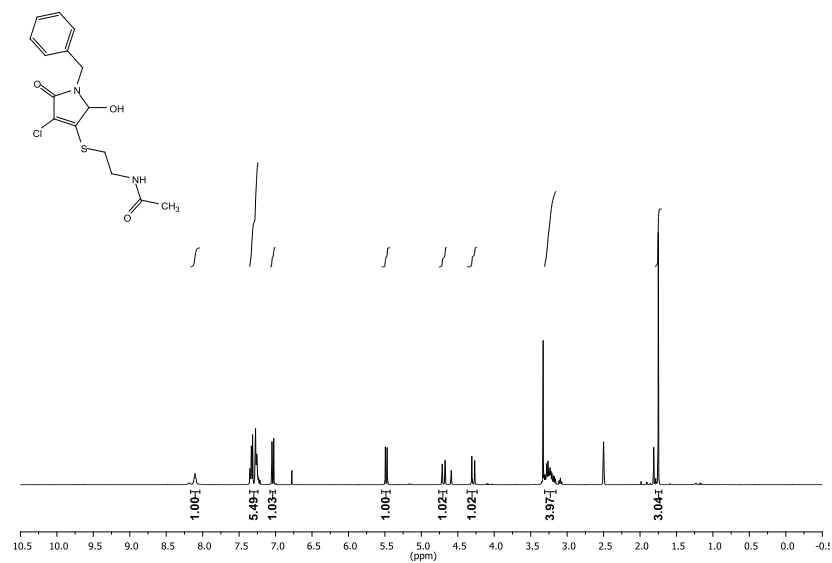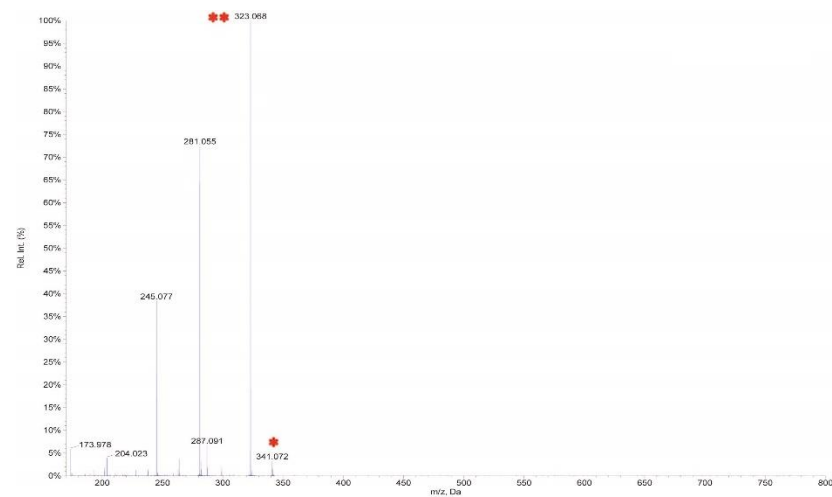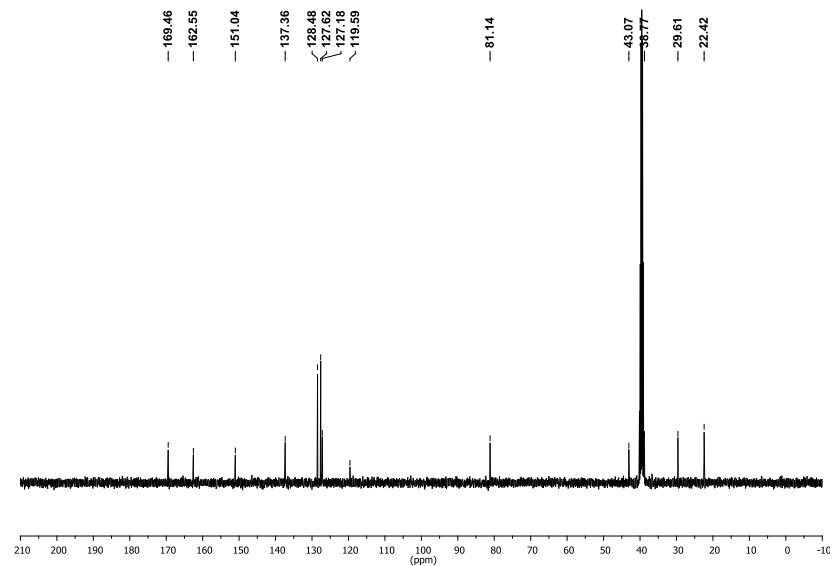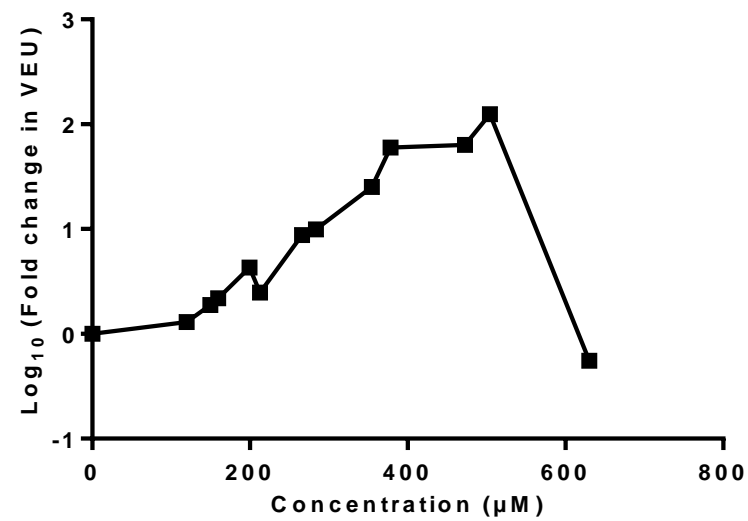



## Compound ID: 22

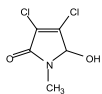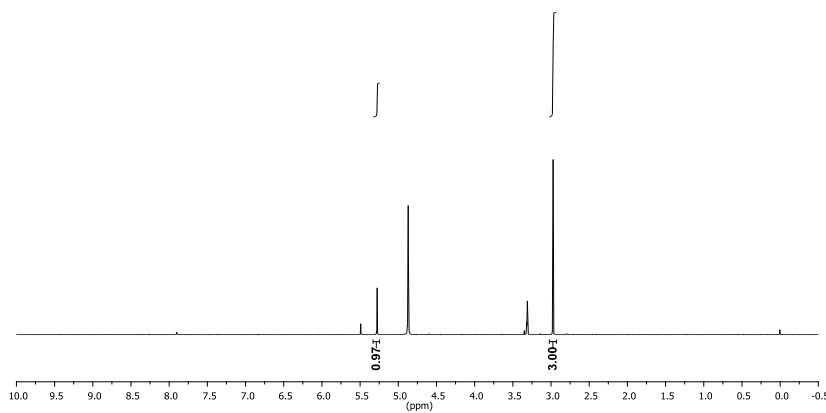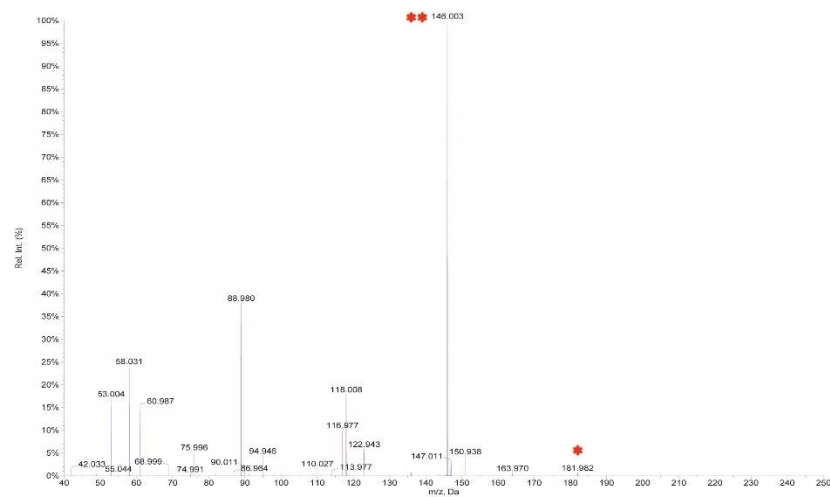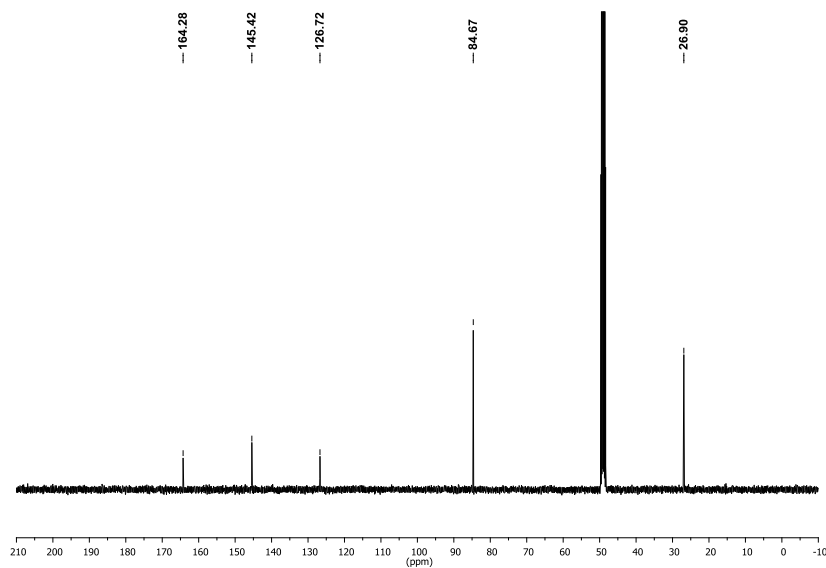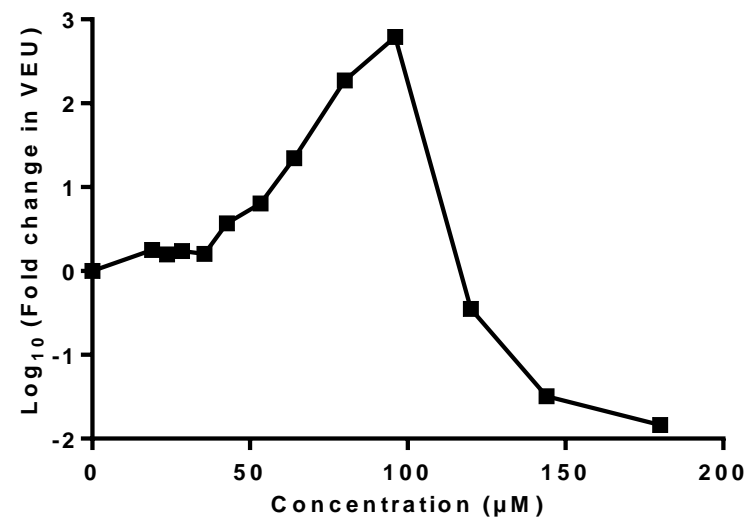

## Compound ID: 23

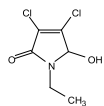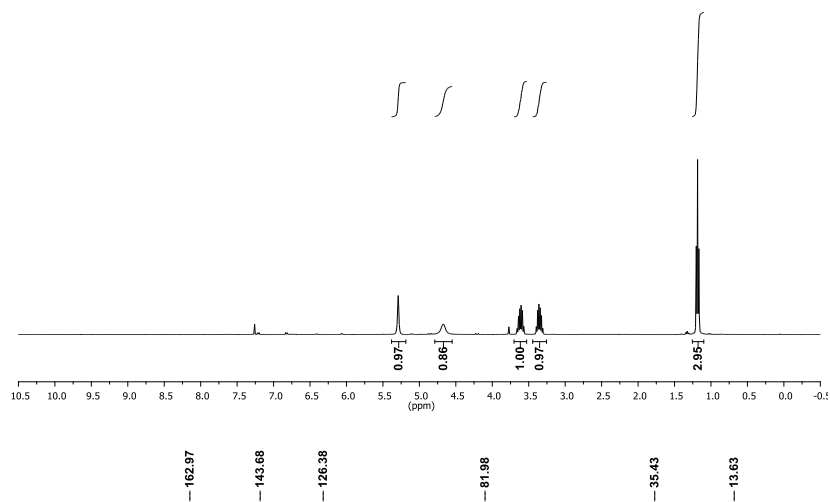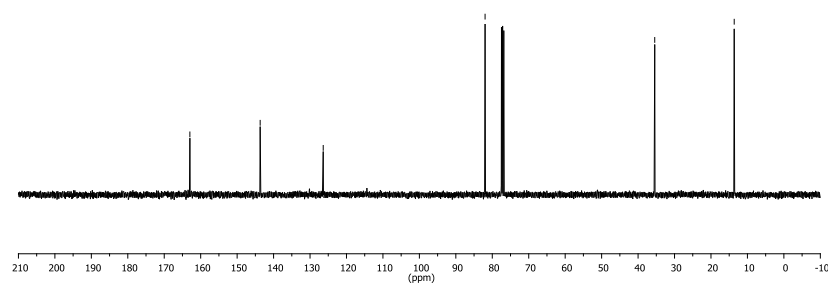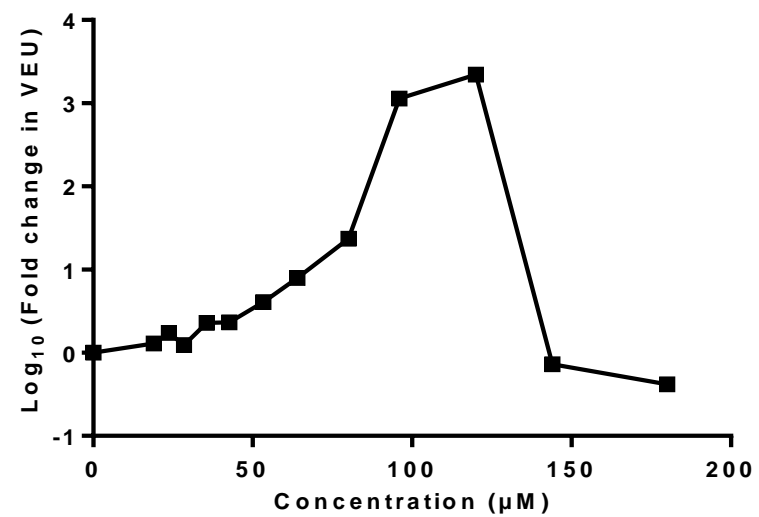

## Compound ID: 24

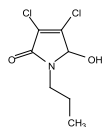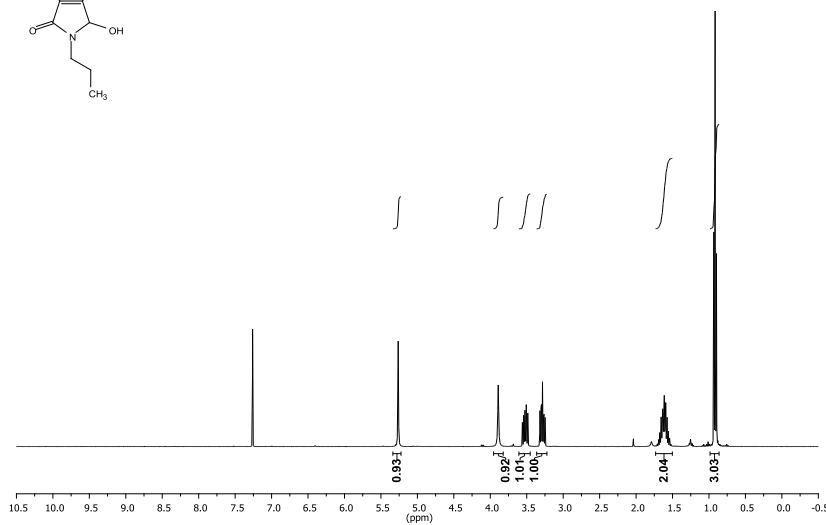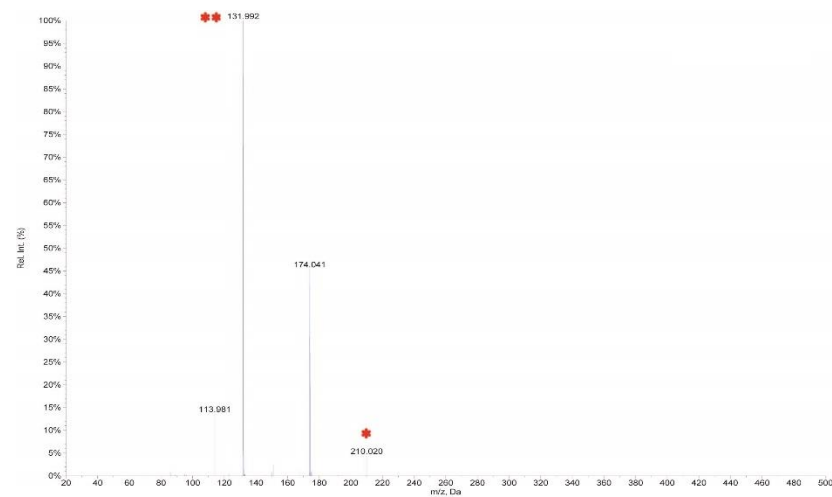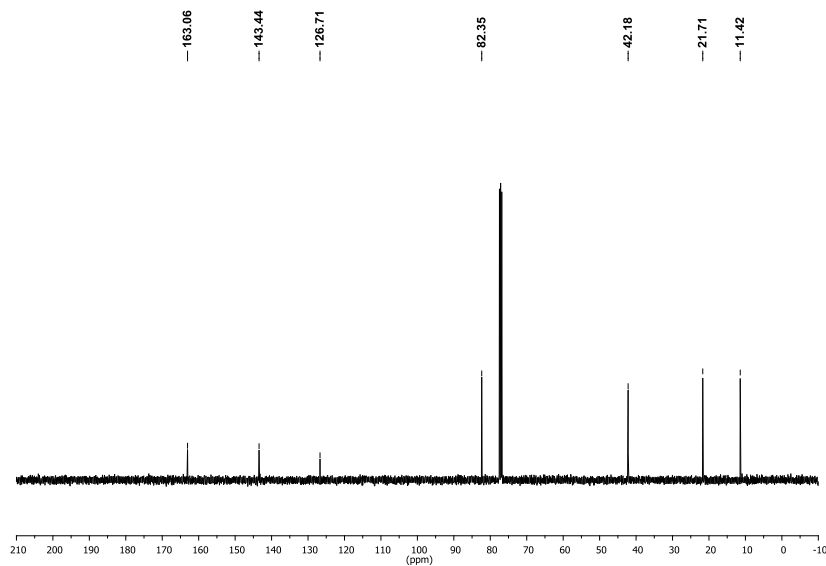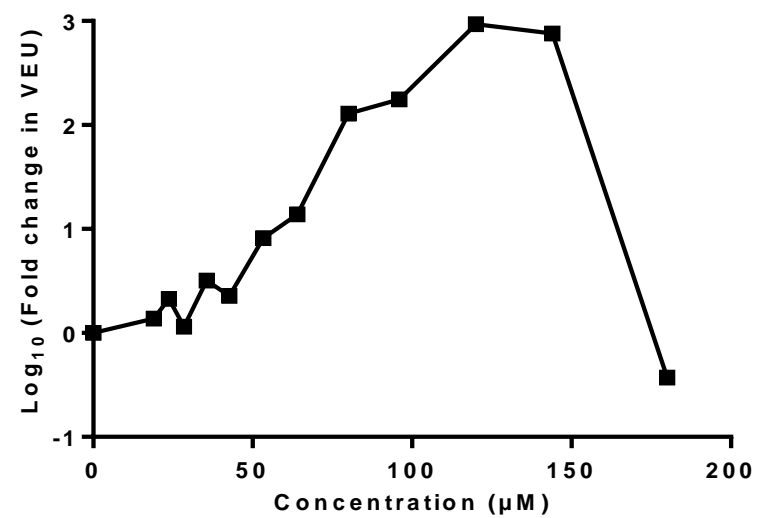

## Compound ID: 25

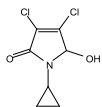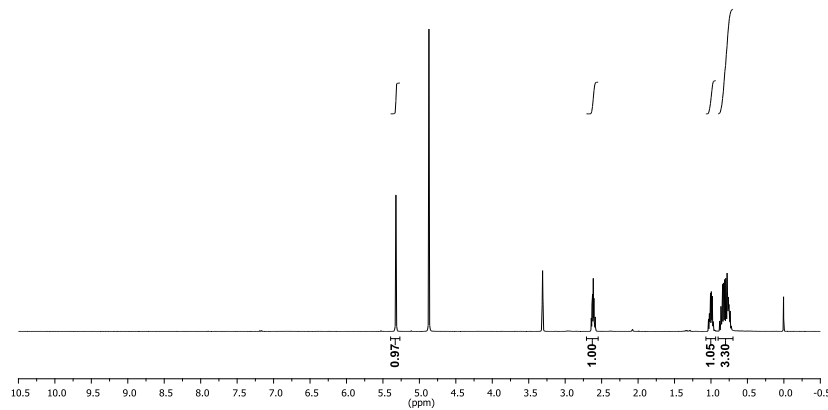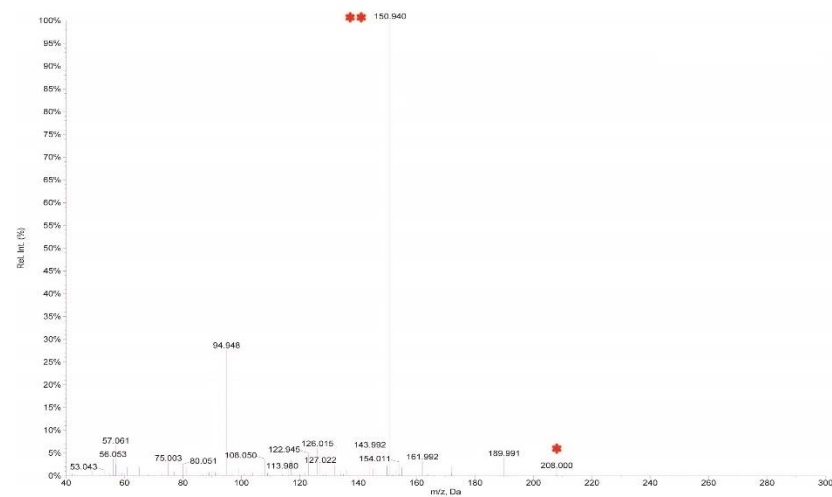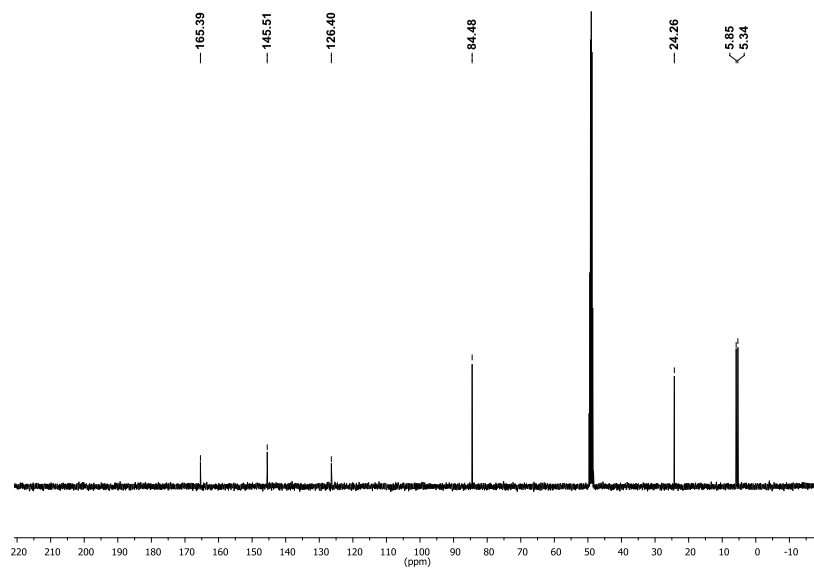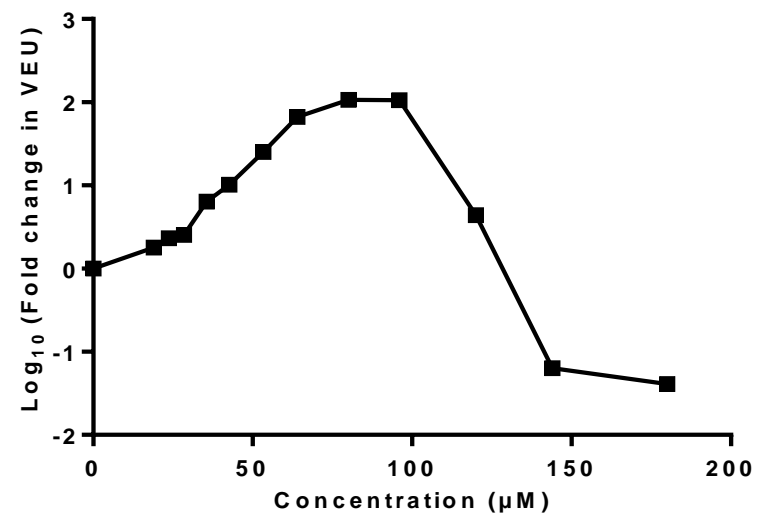

## Compound ID: 26

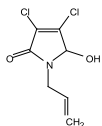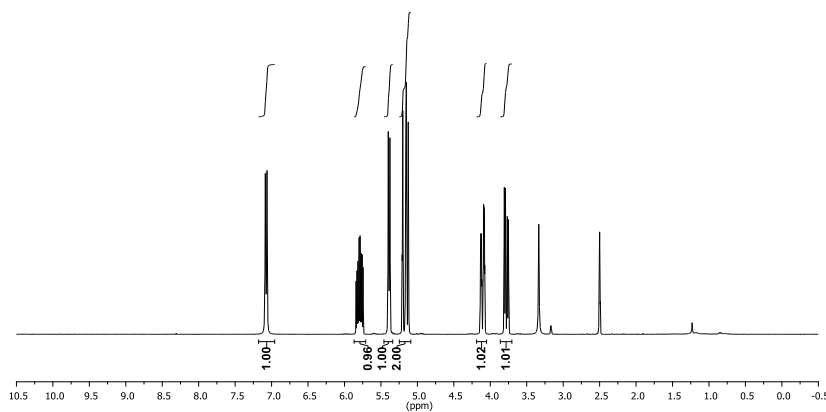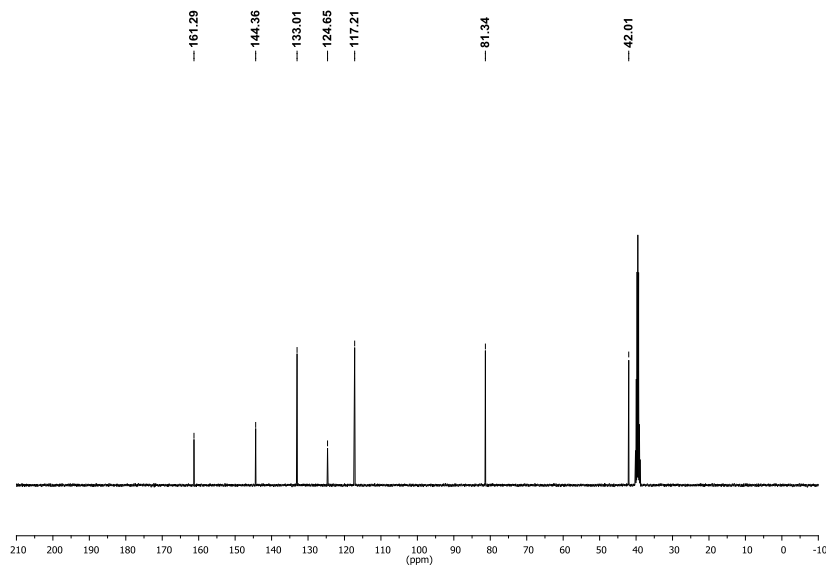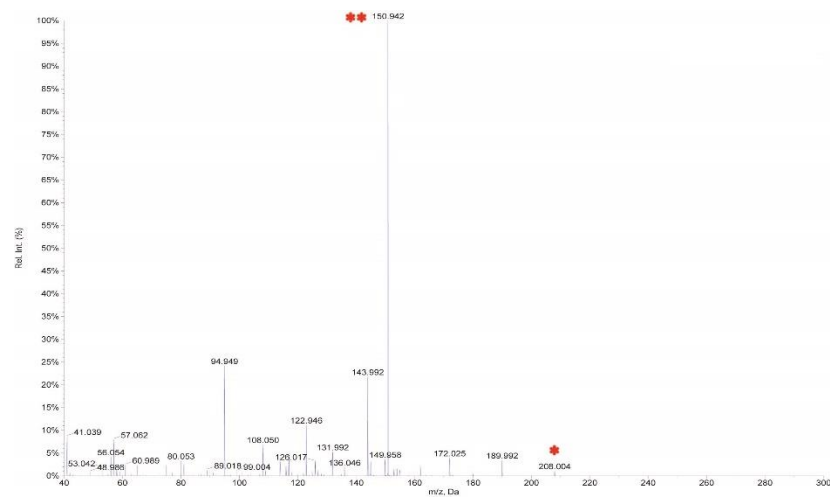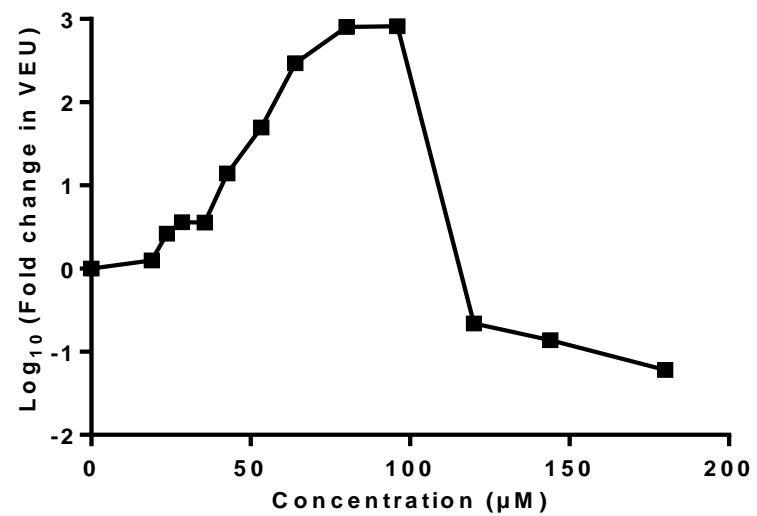

## Compound ID: 27

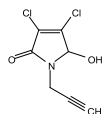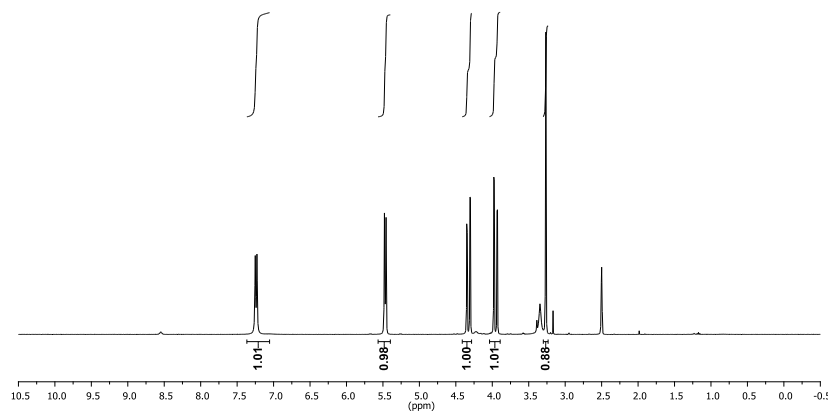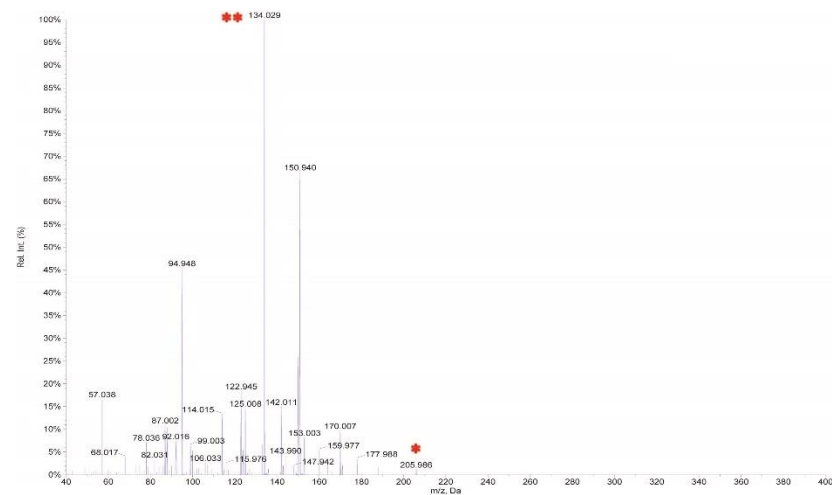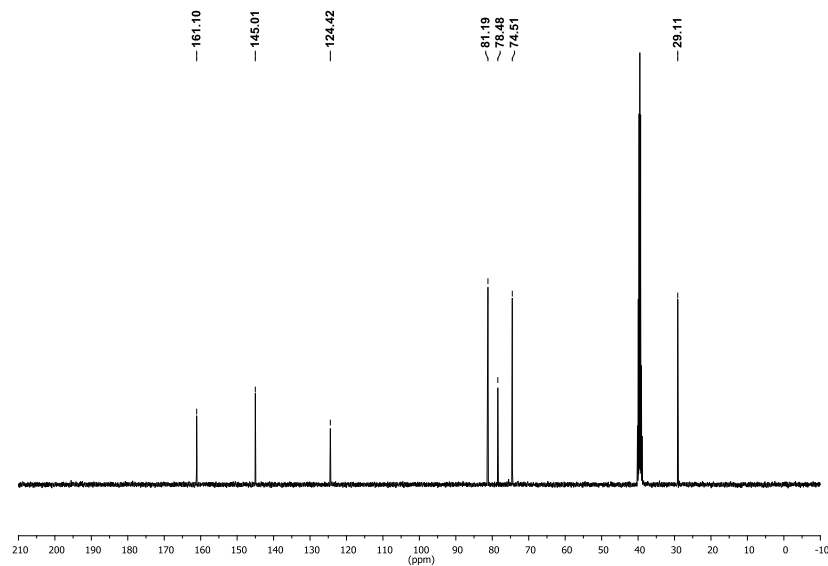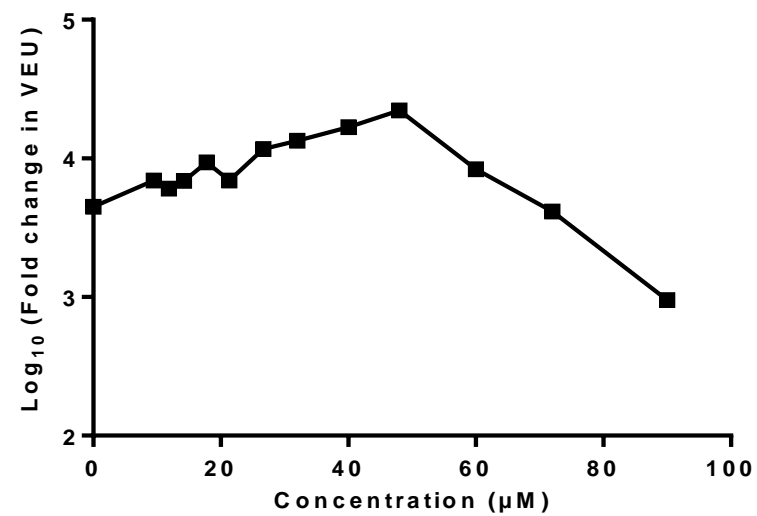

## Compound ID: 28

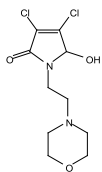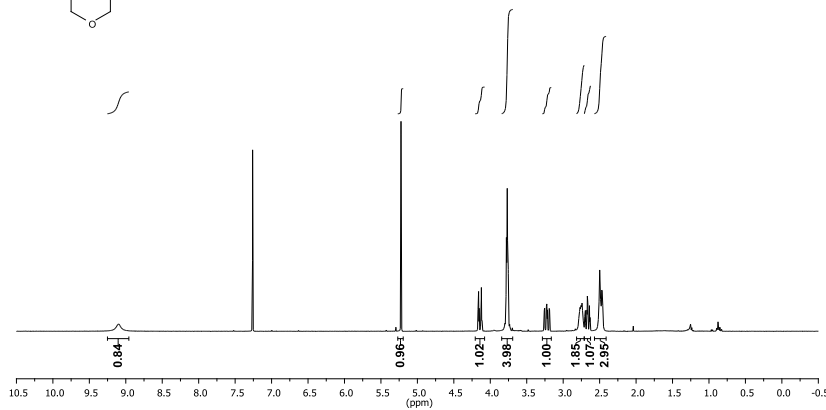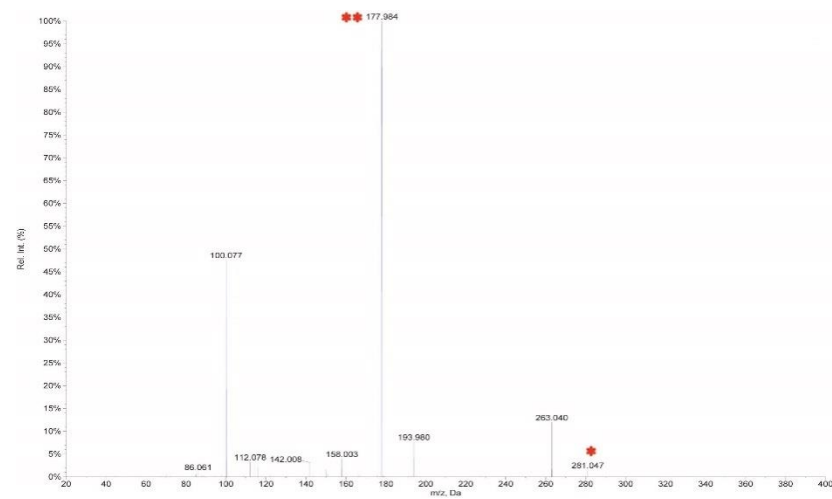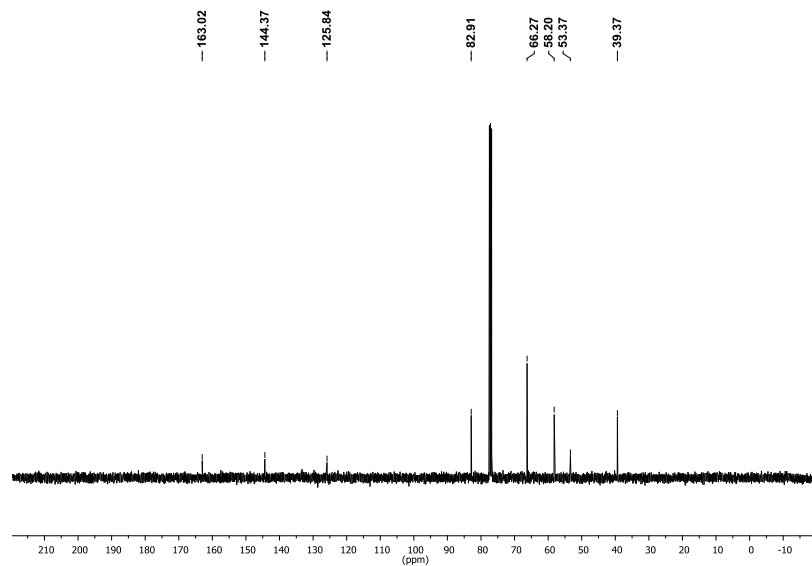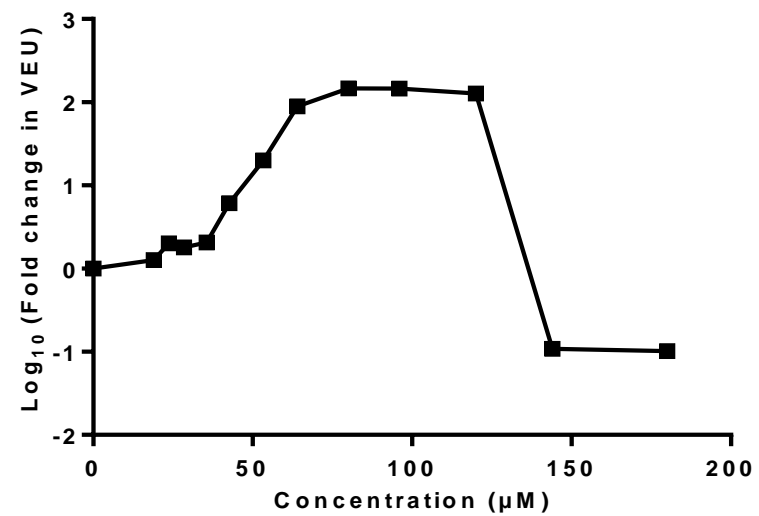

Compound ID: 29

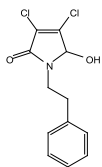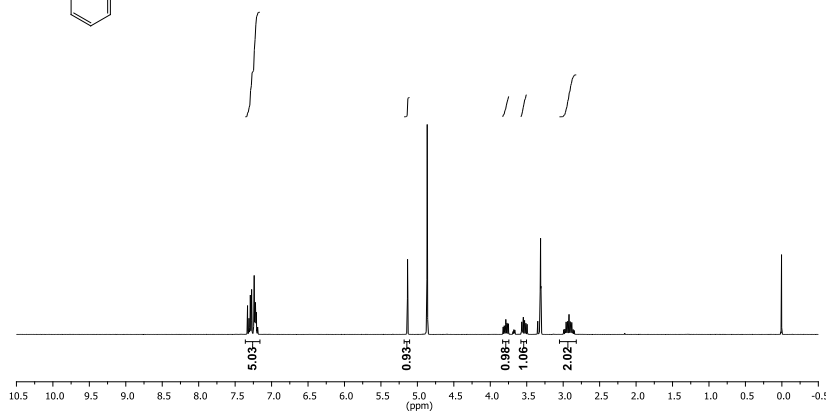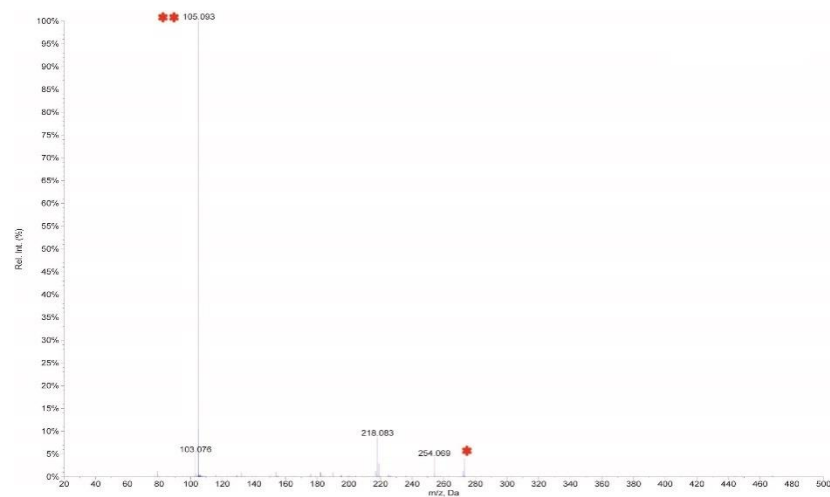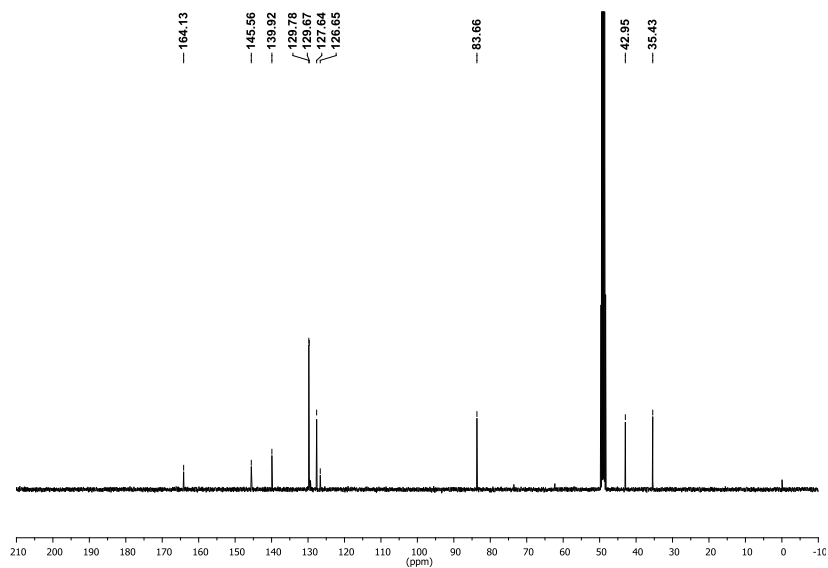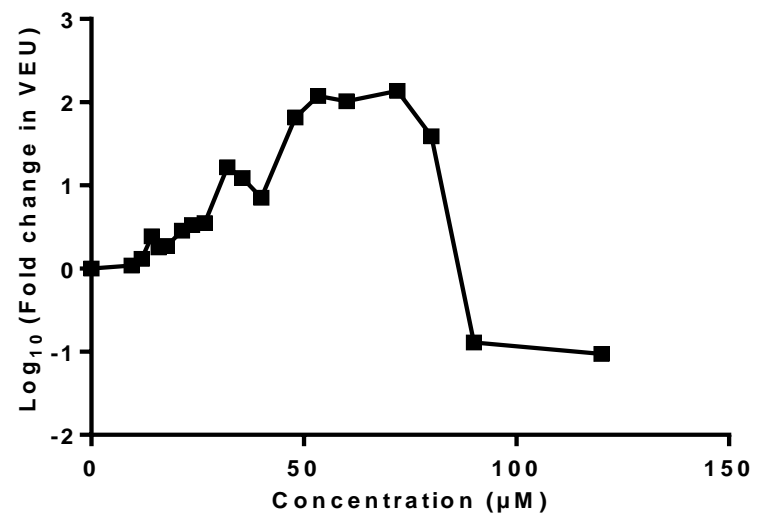



## Compound ID: 30

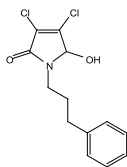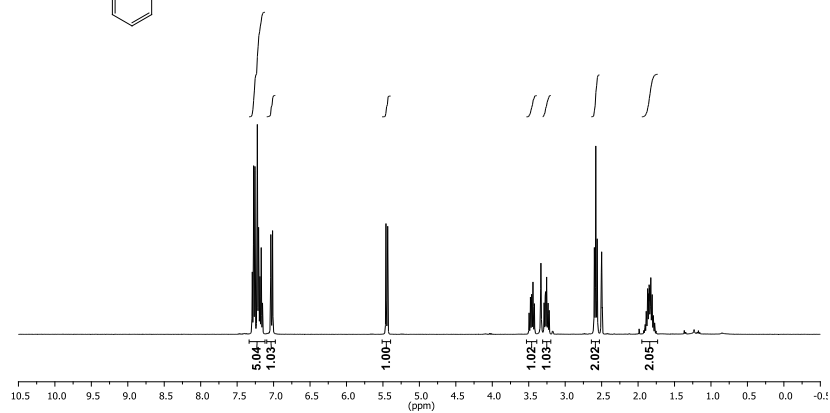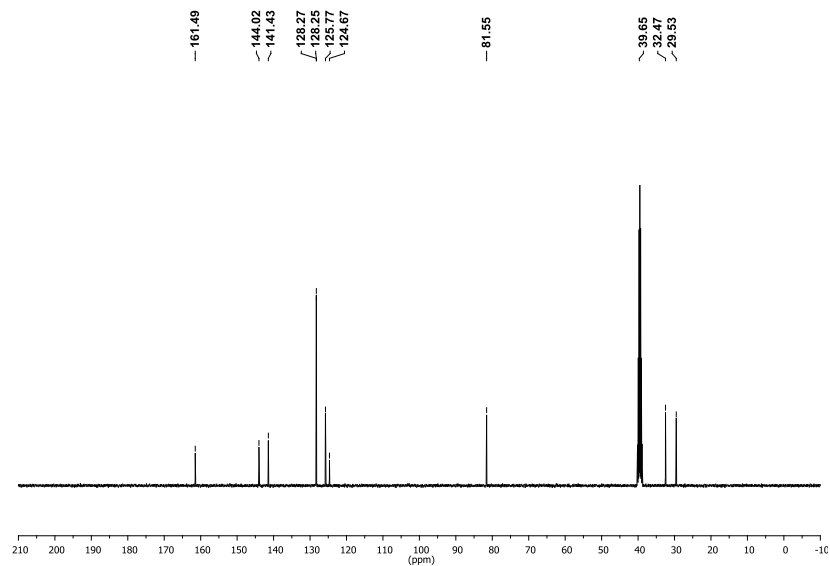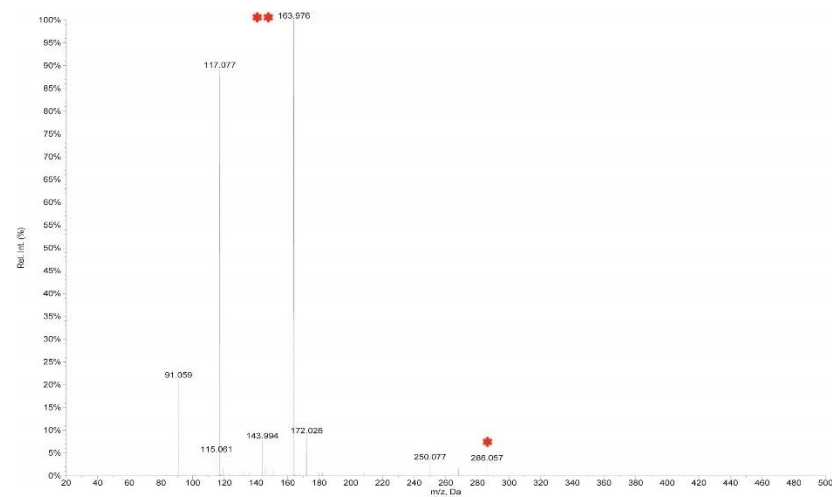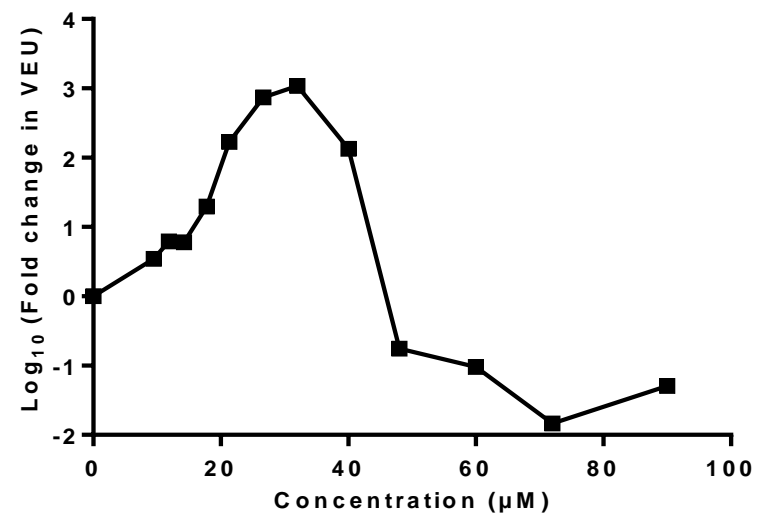

## Compound ID: 31

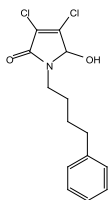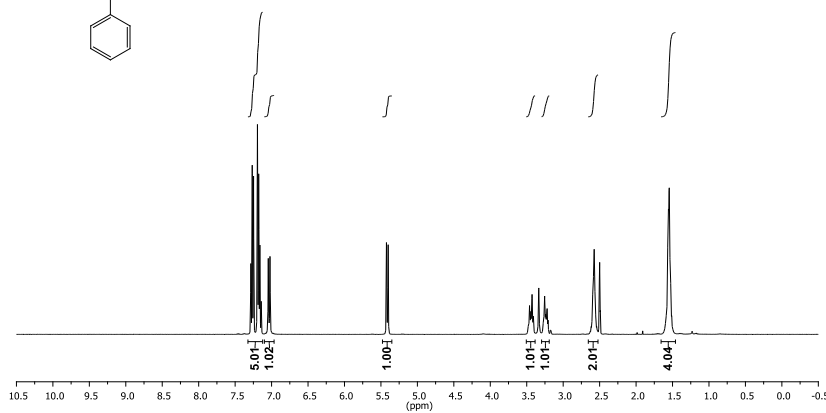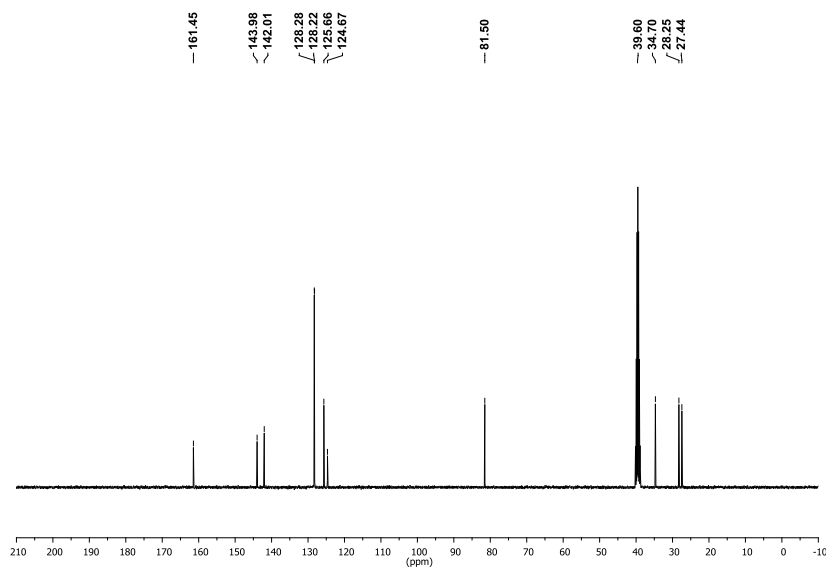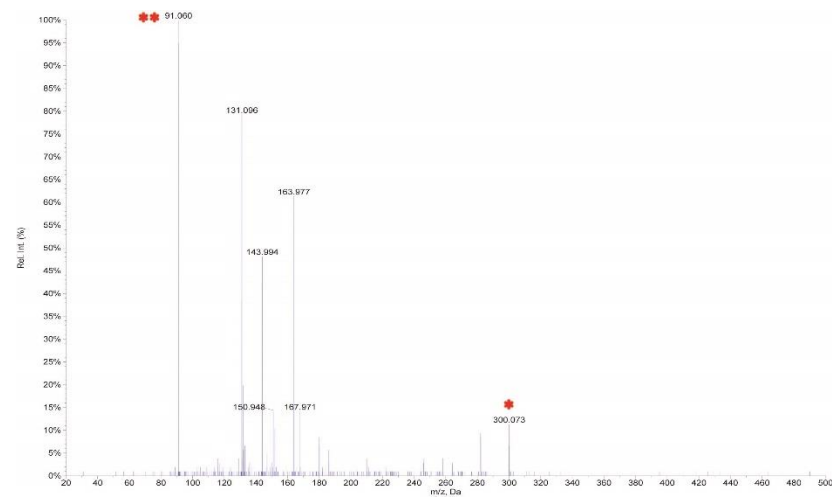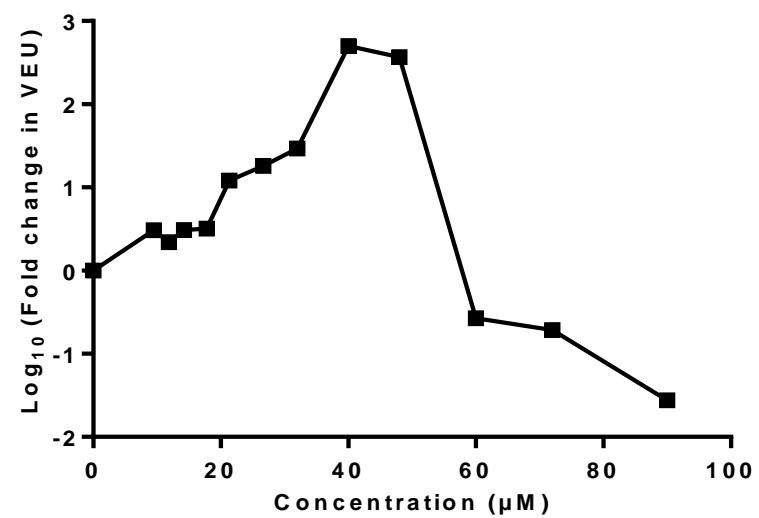

Compound ID: 32

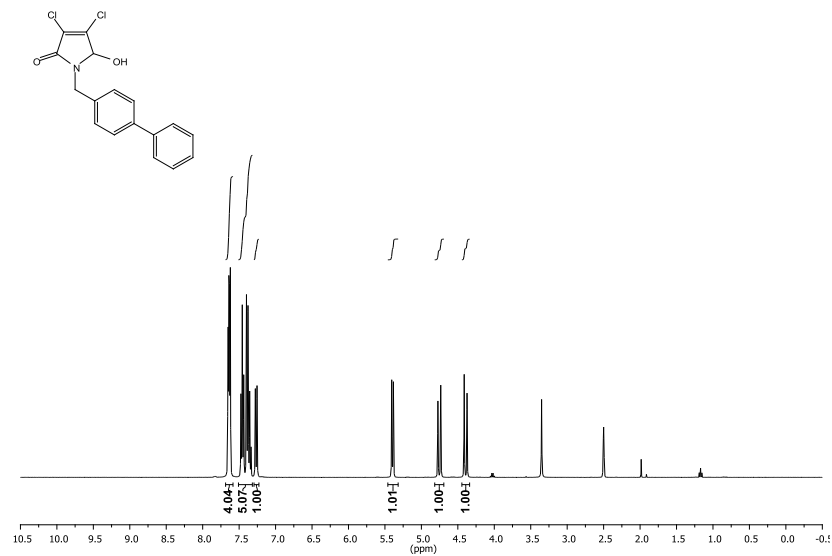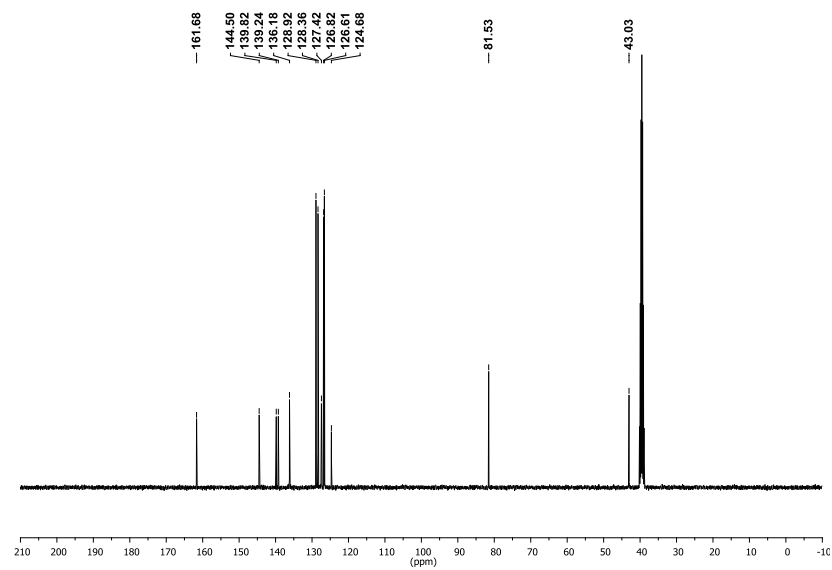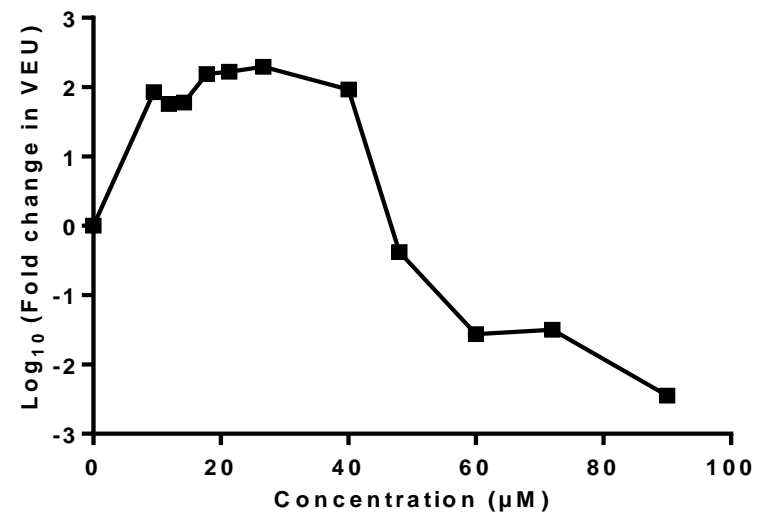

Compound ID: 33

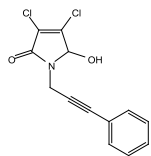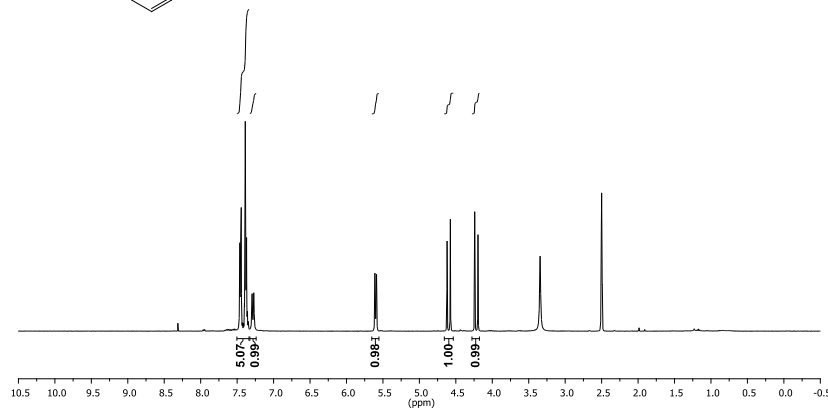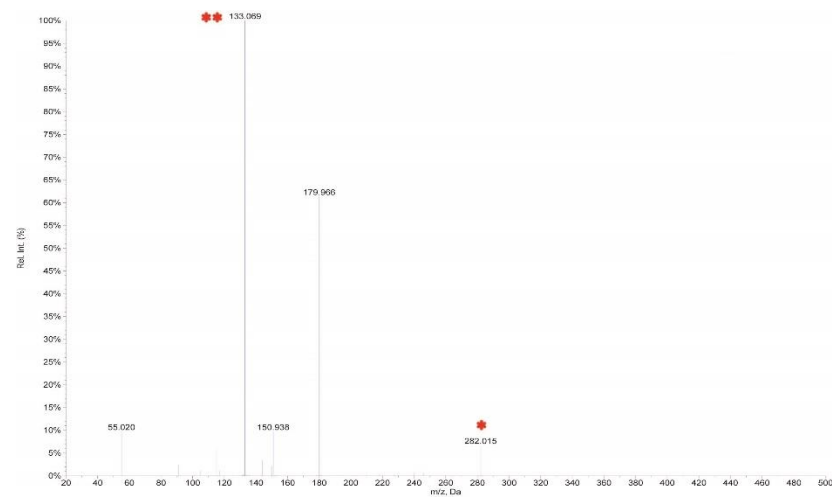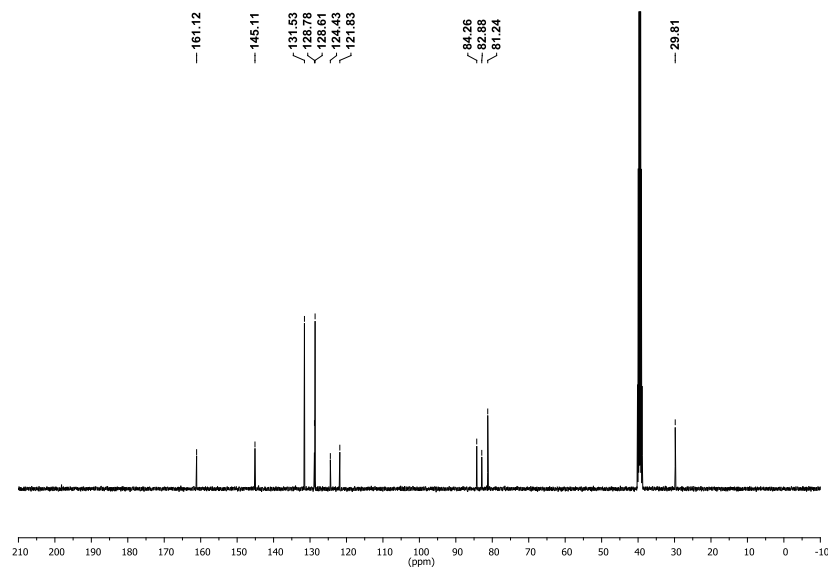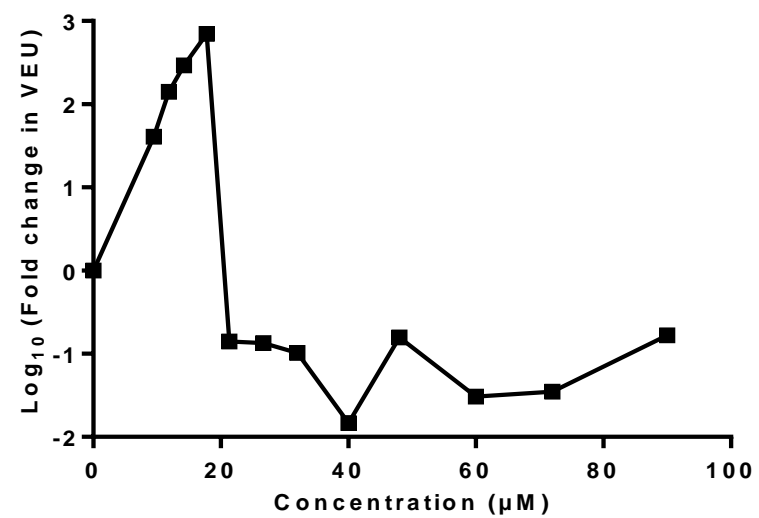

## Compound ID: 34

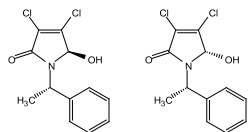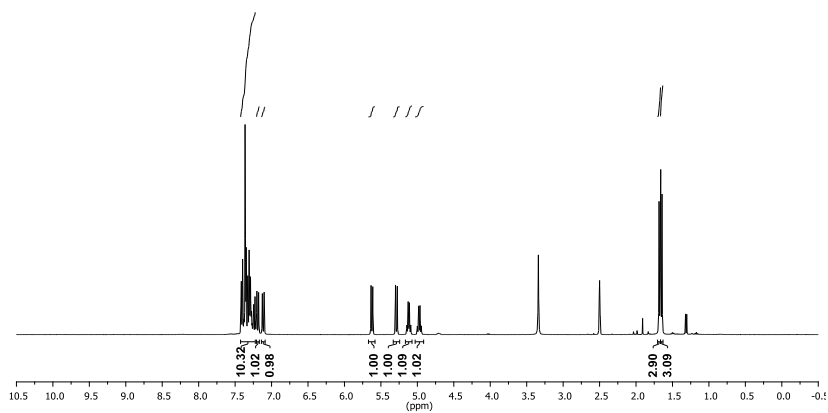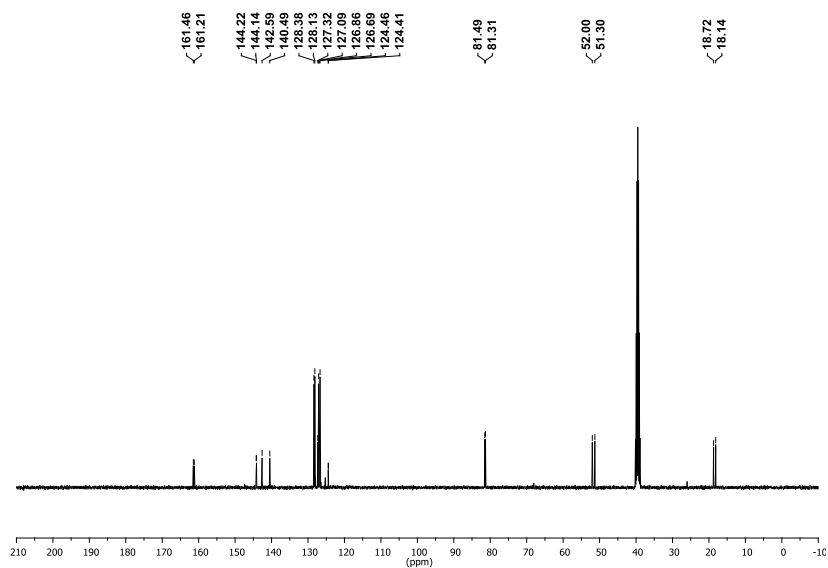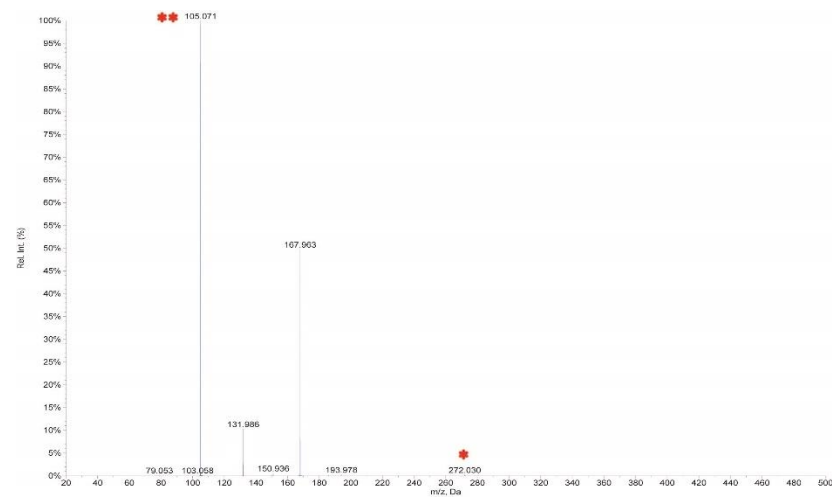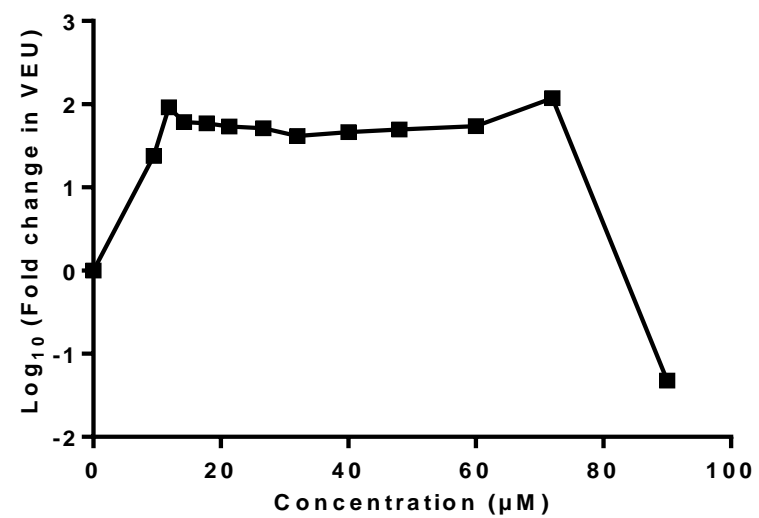

## Compound ID: 35

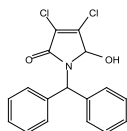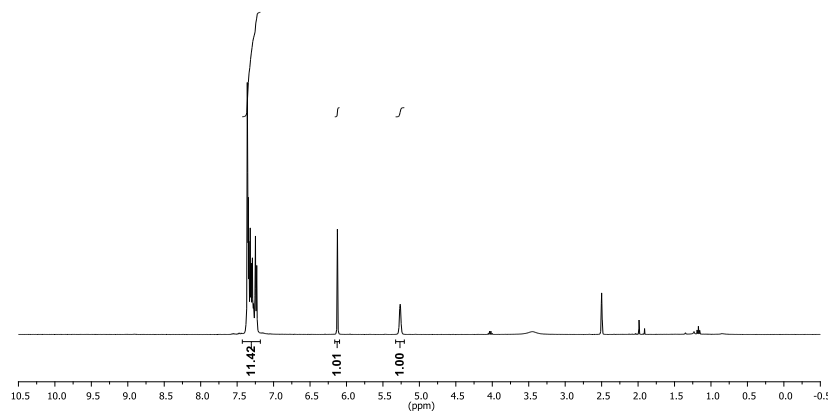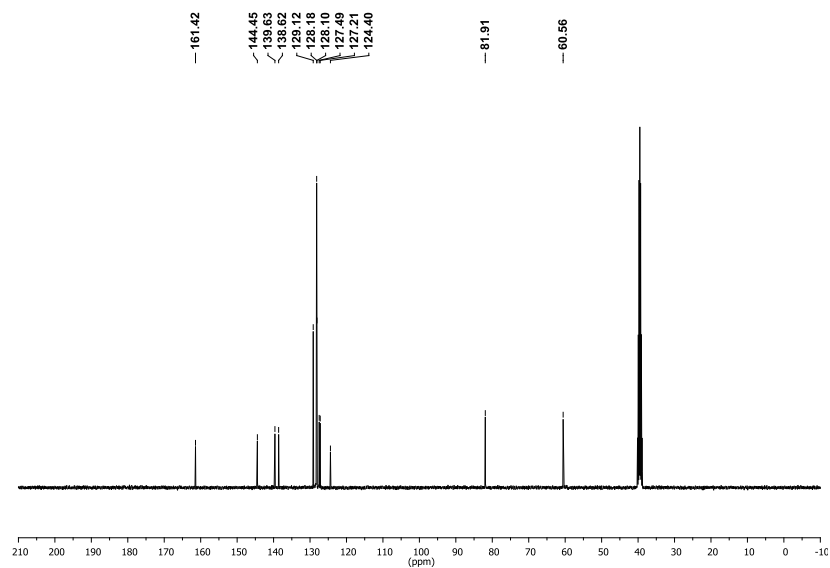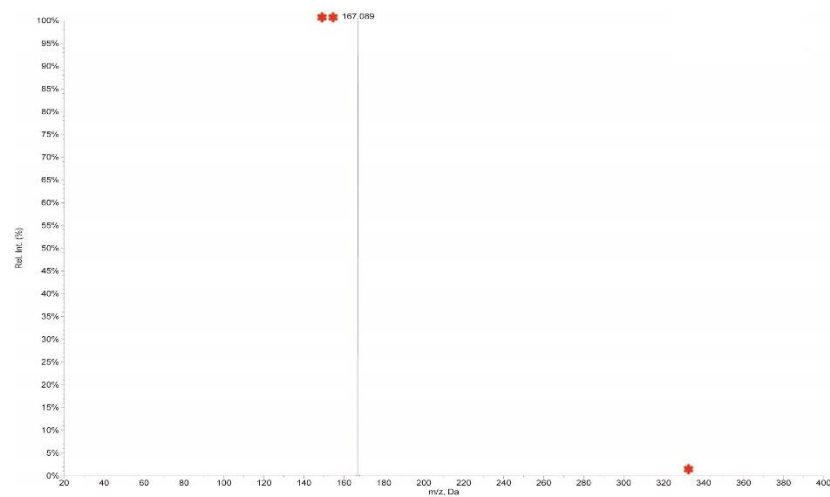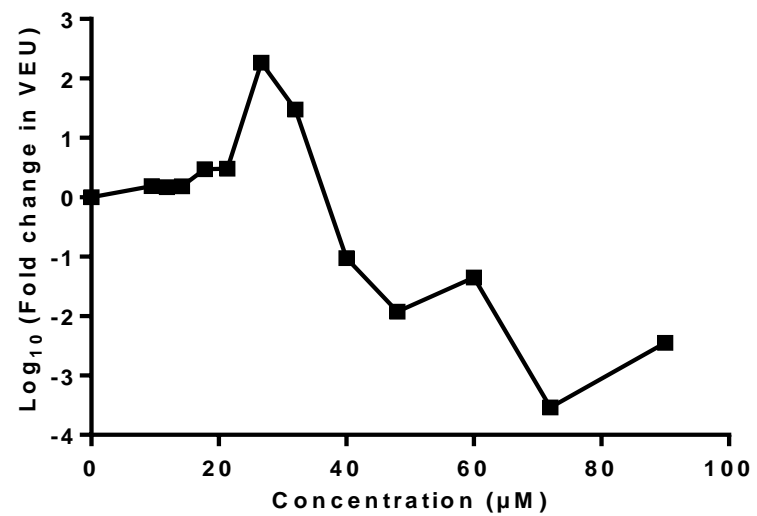

## Compound ID: 36

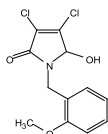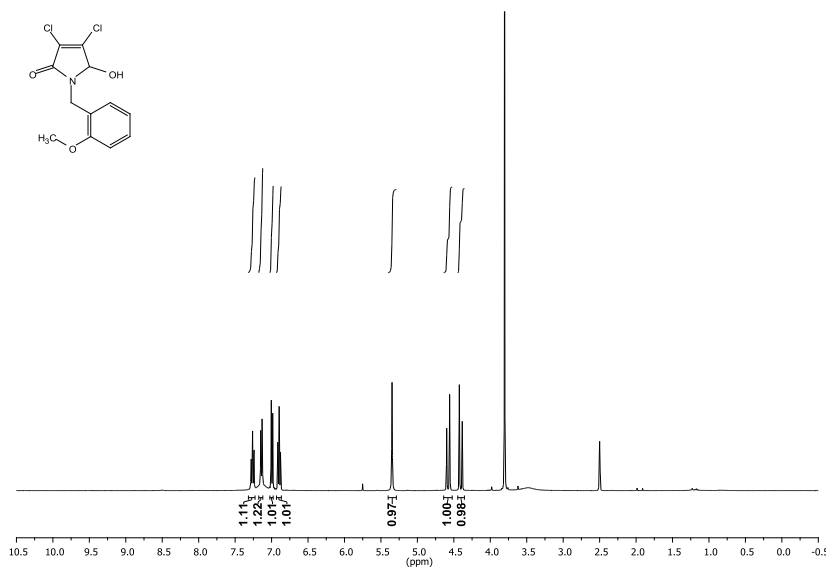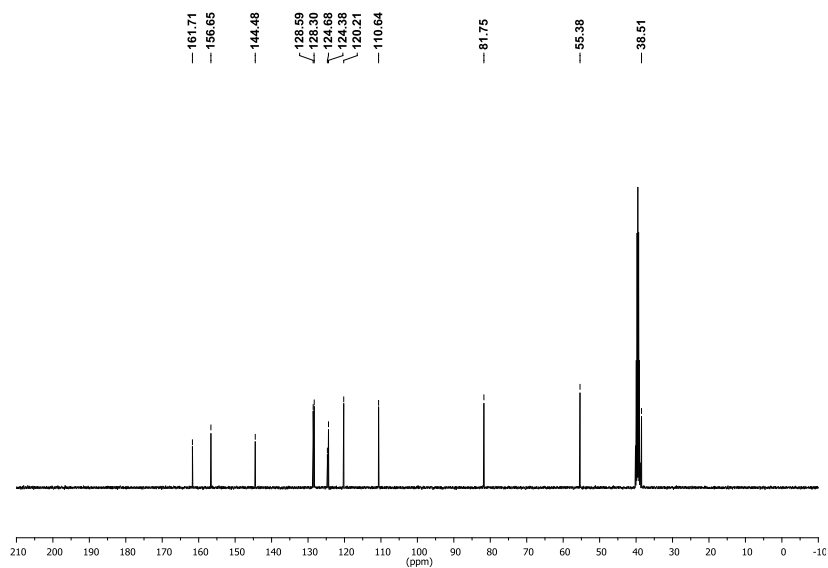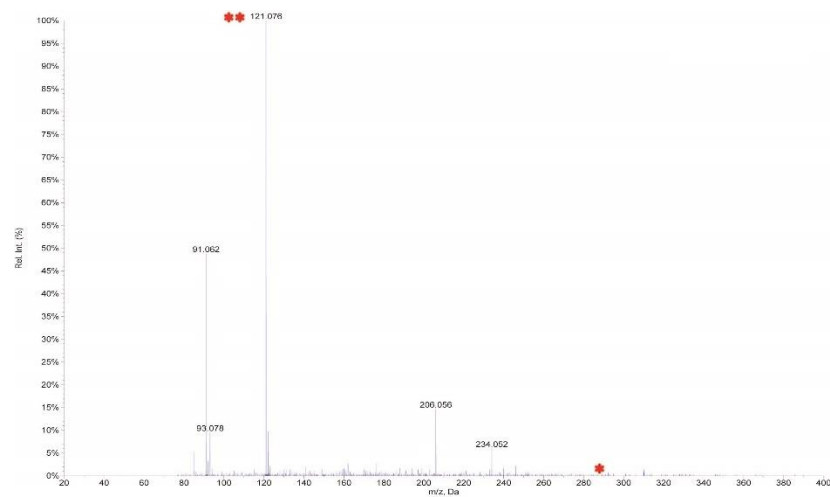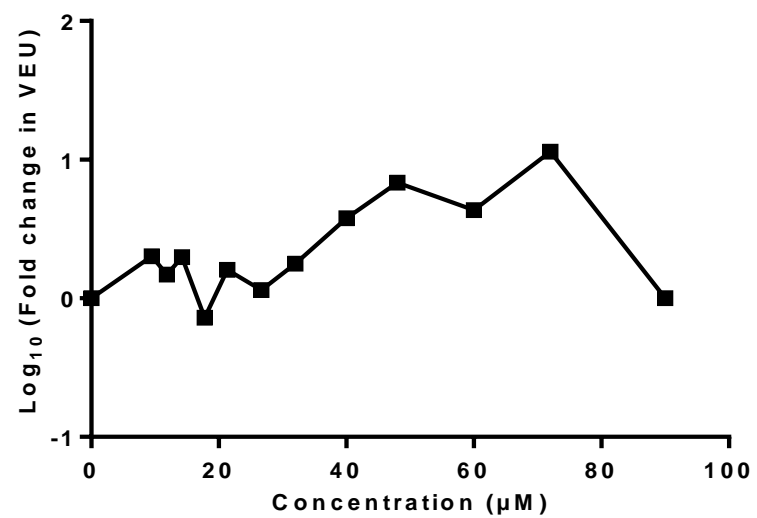

## Compound ID: 37

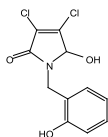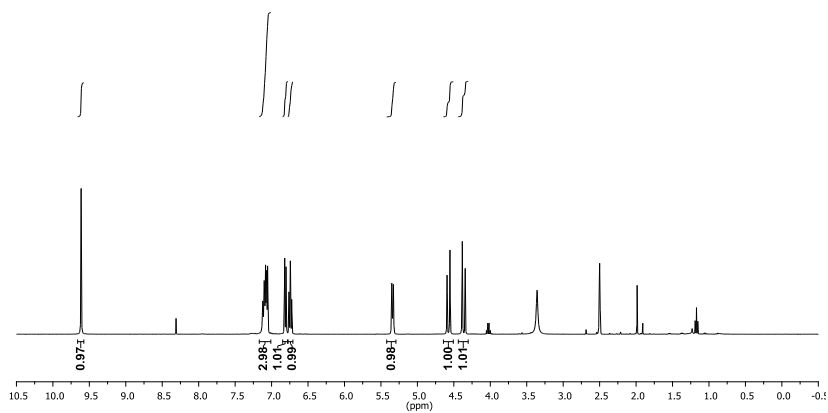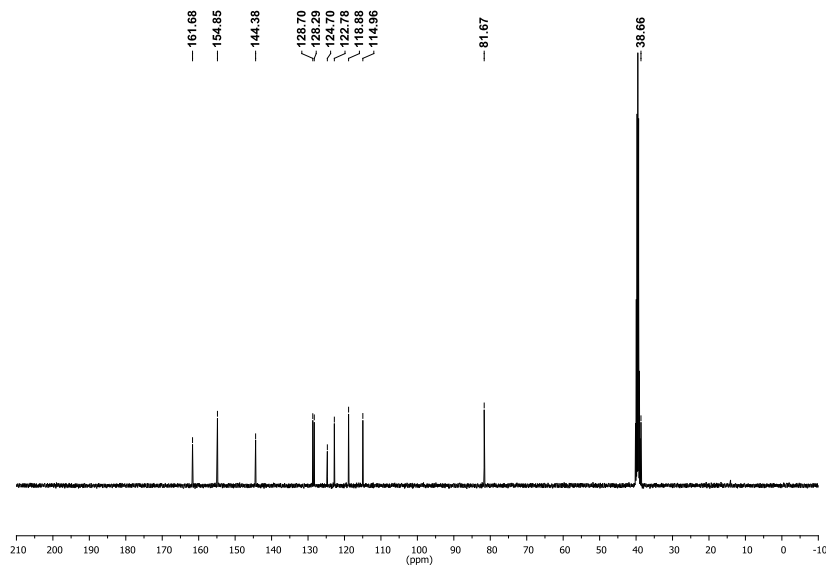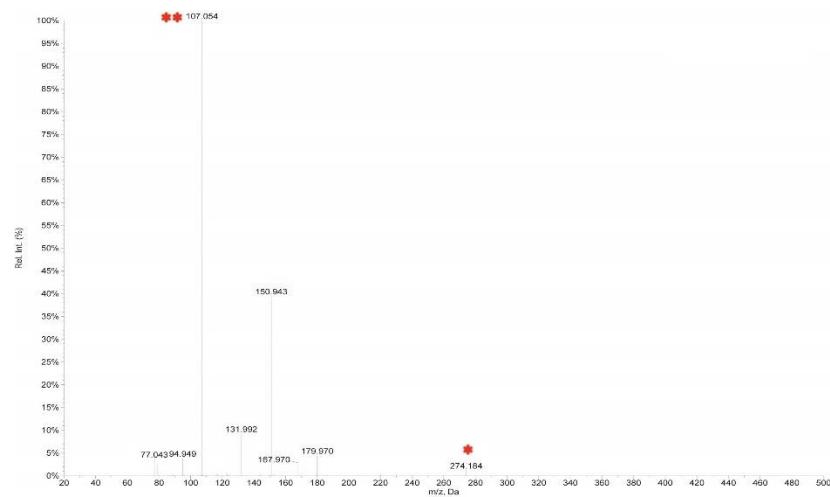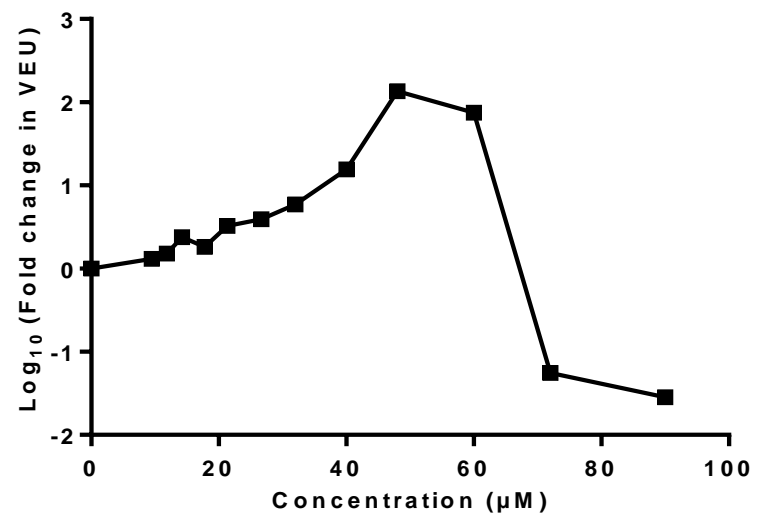



## Compound ID: 38

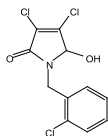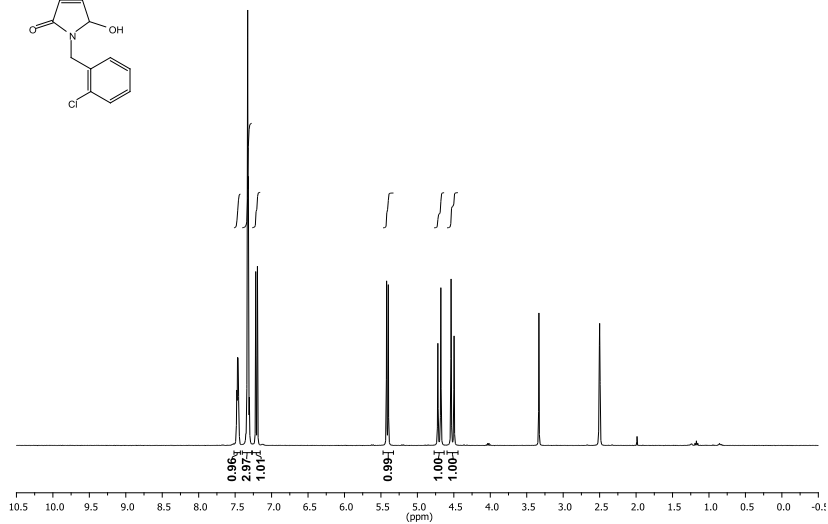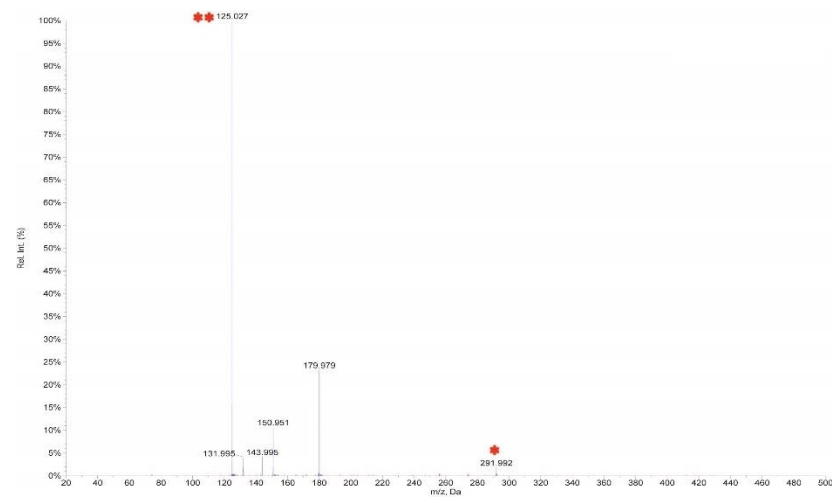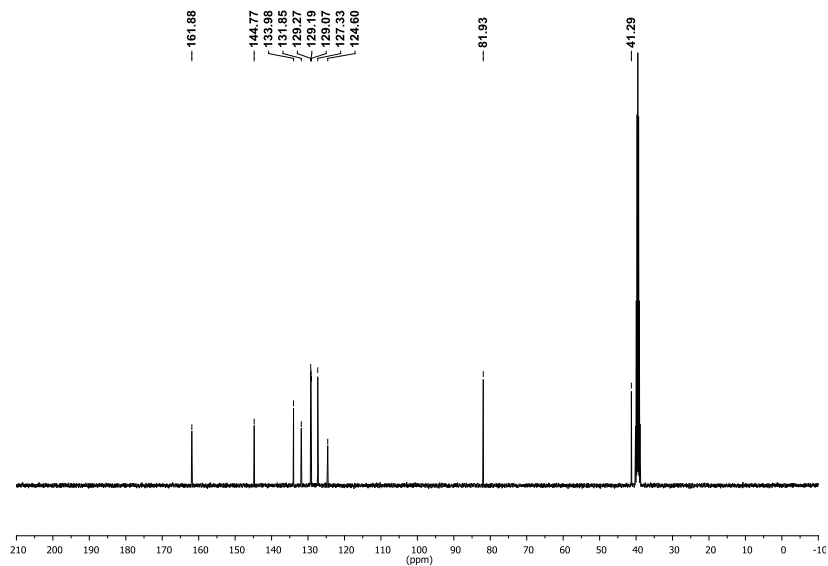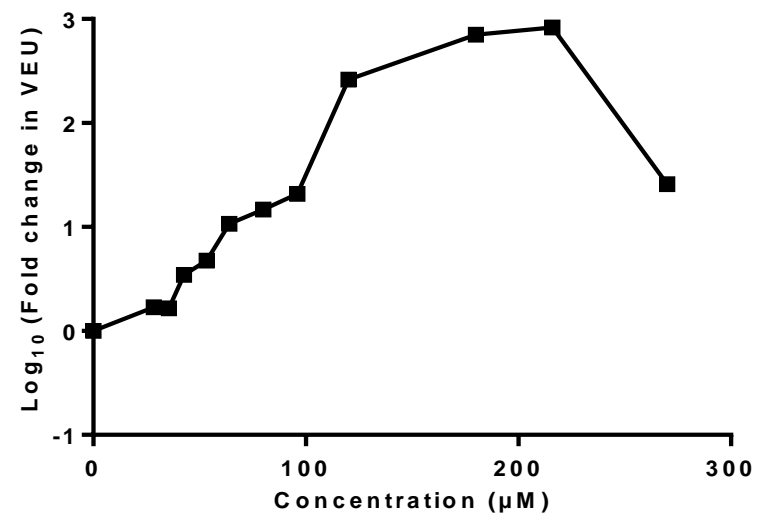

## Compound ID: 39

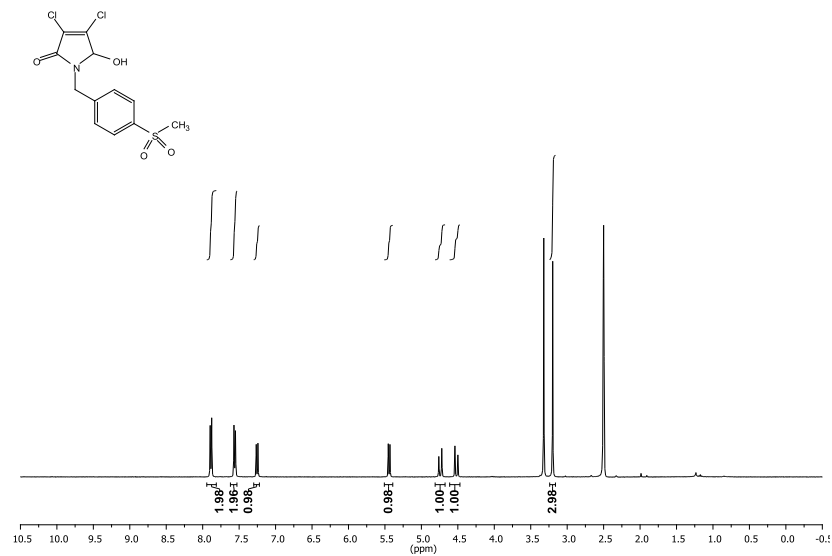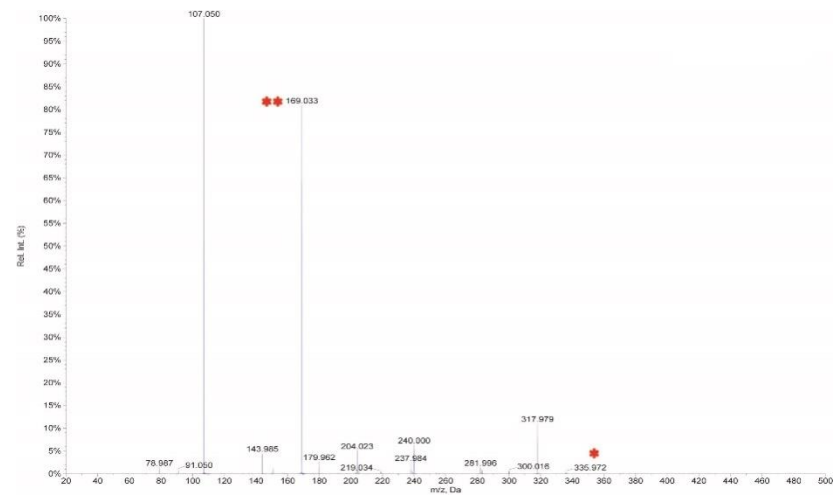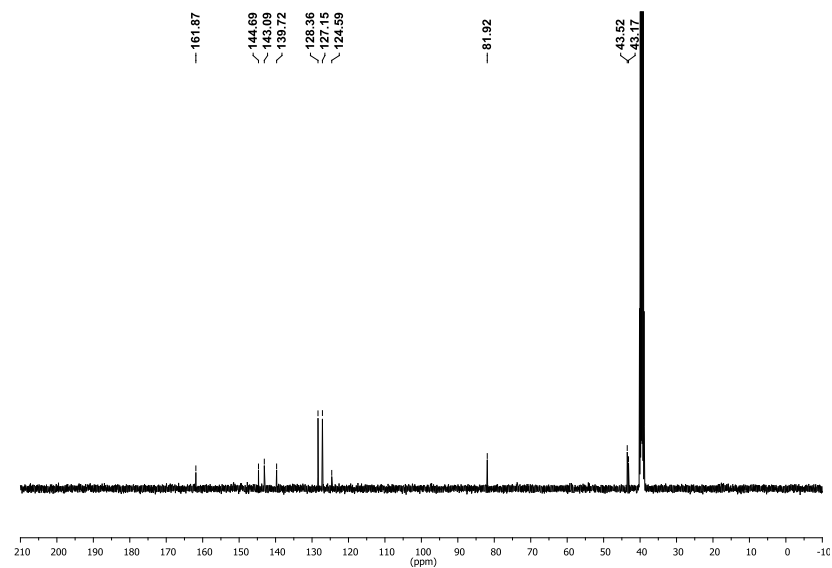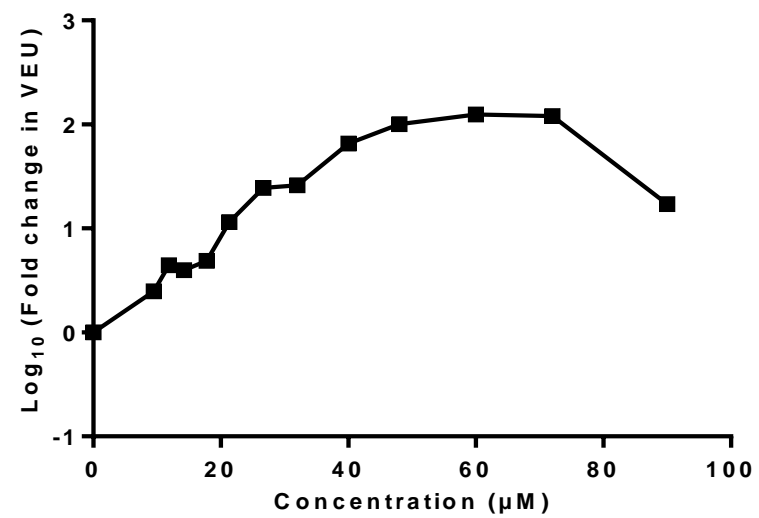

## Compound ID: 40

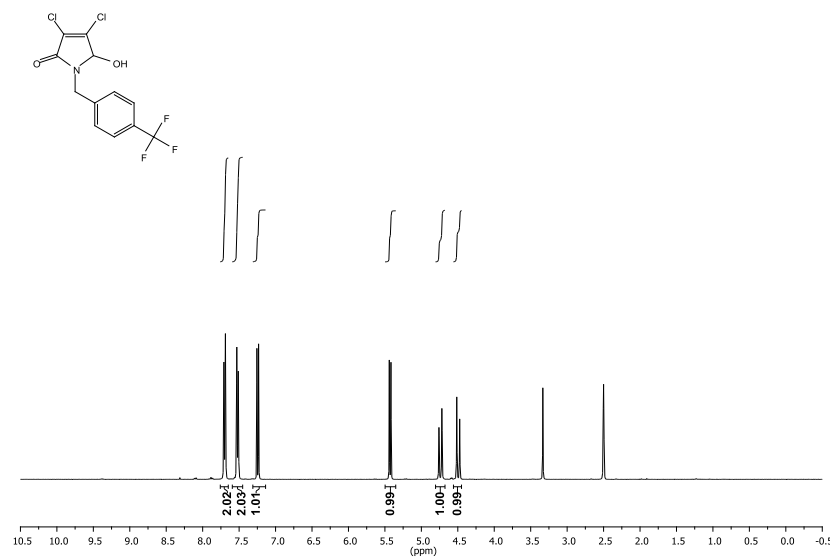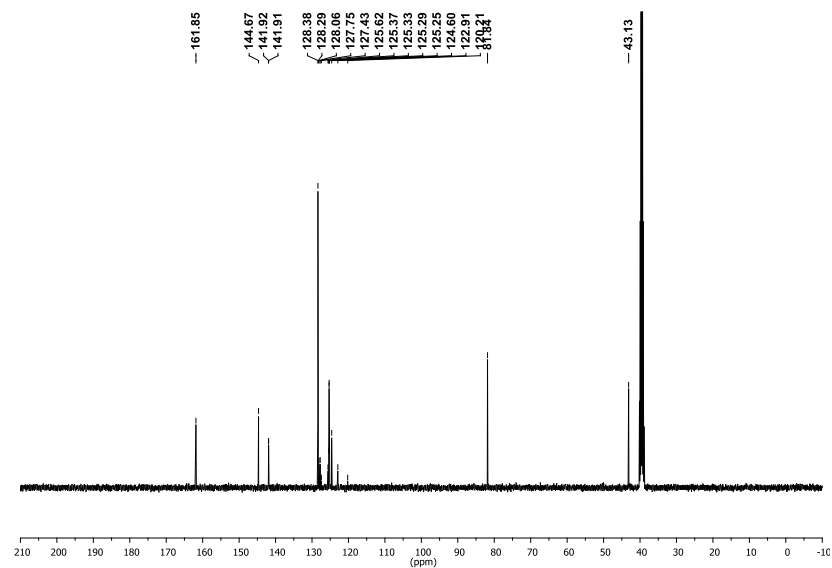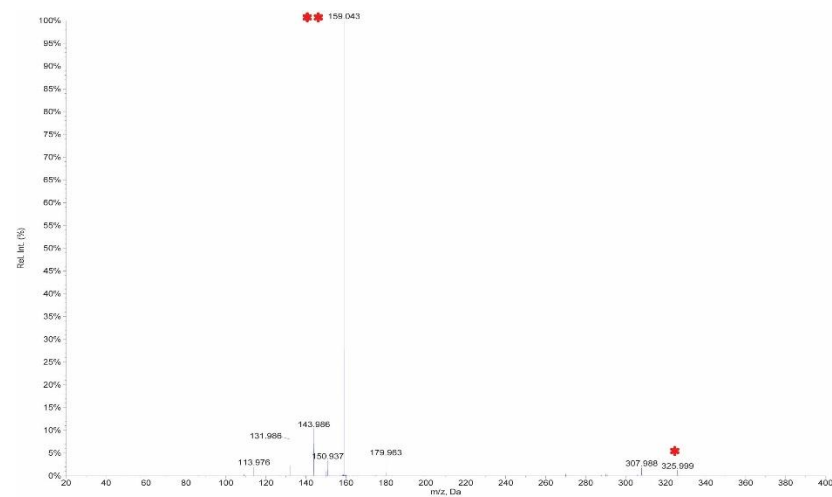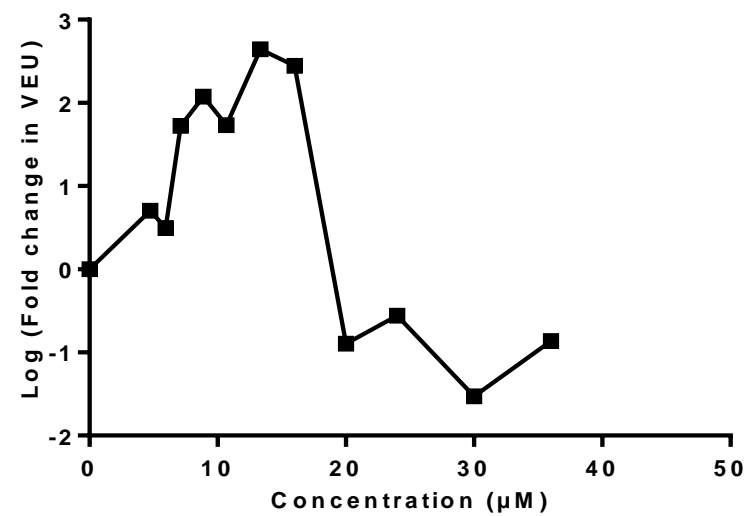

## Compound ID: 41

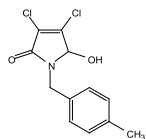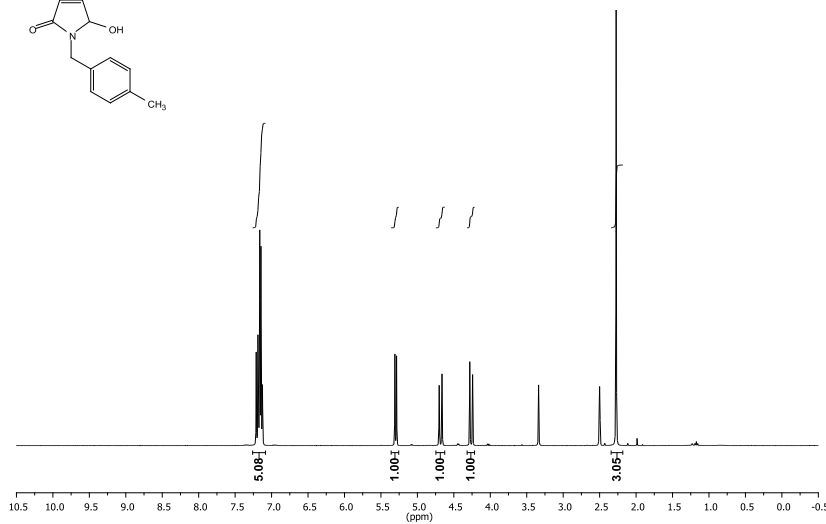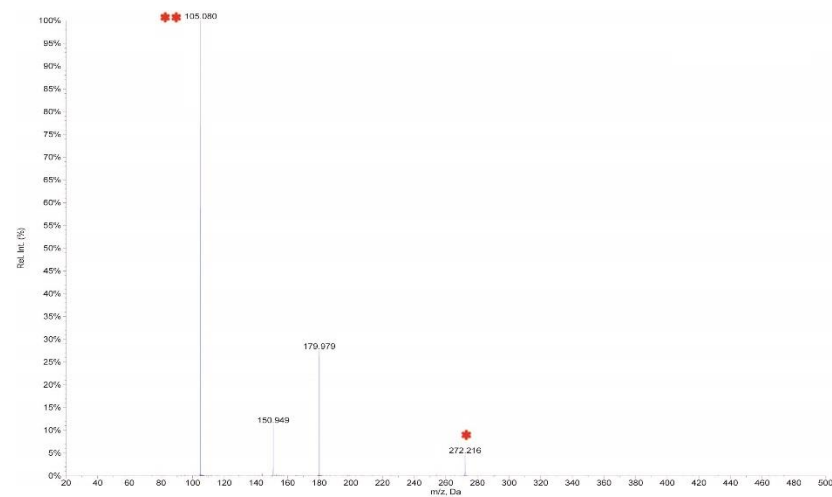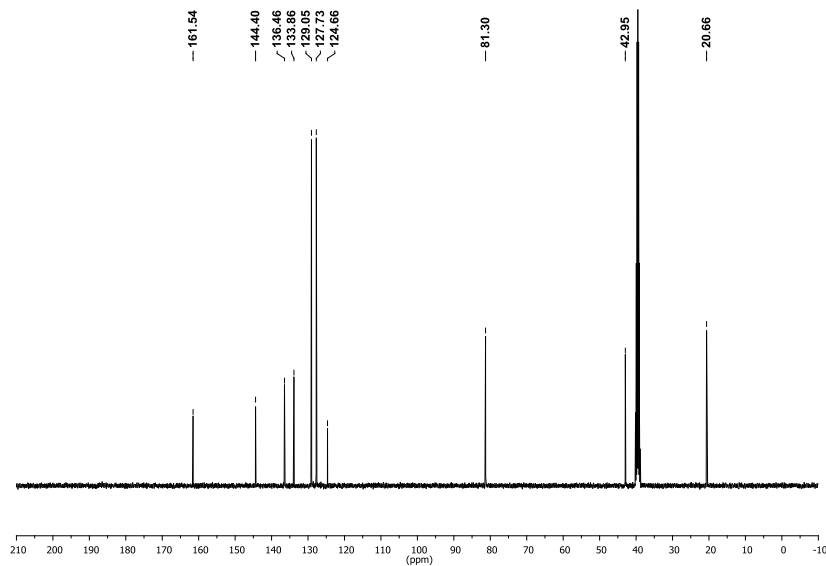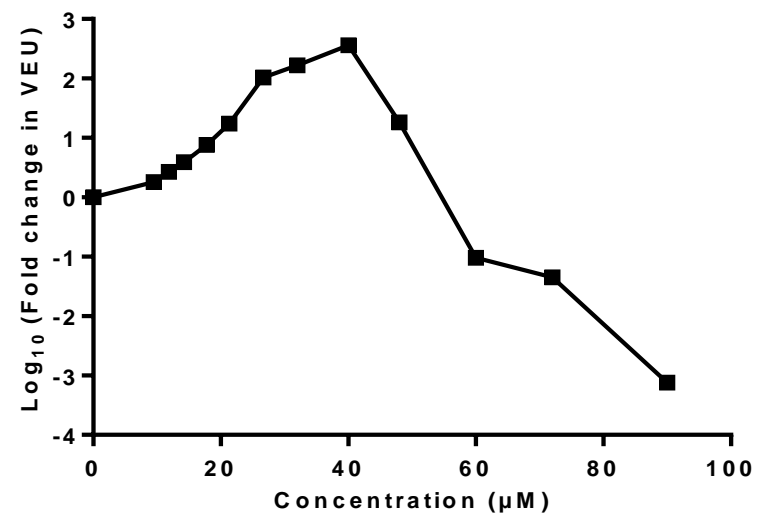

## Compound ID: 42

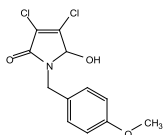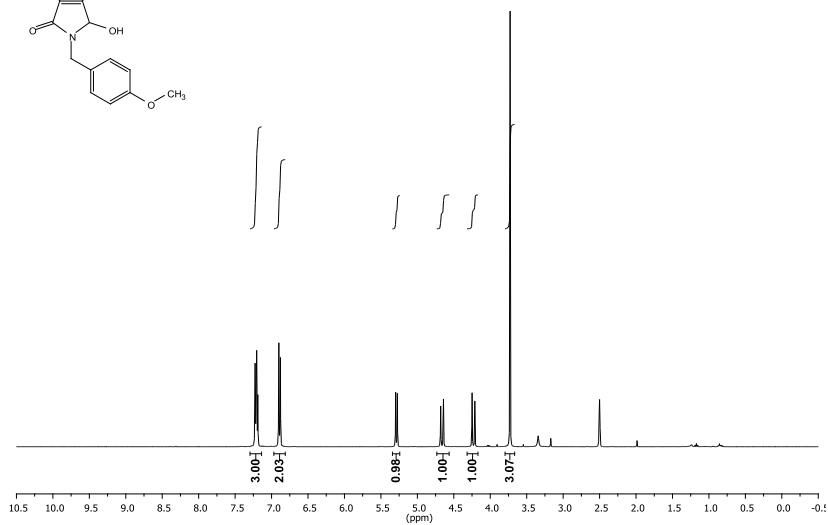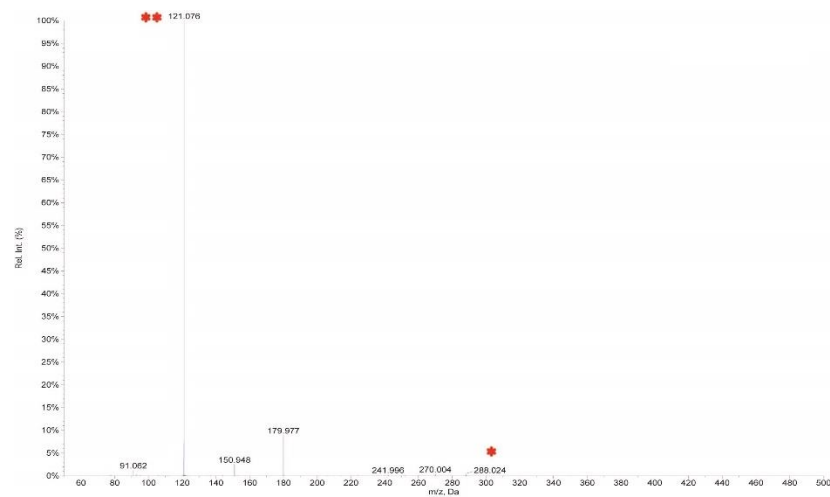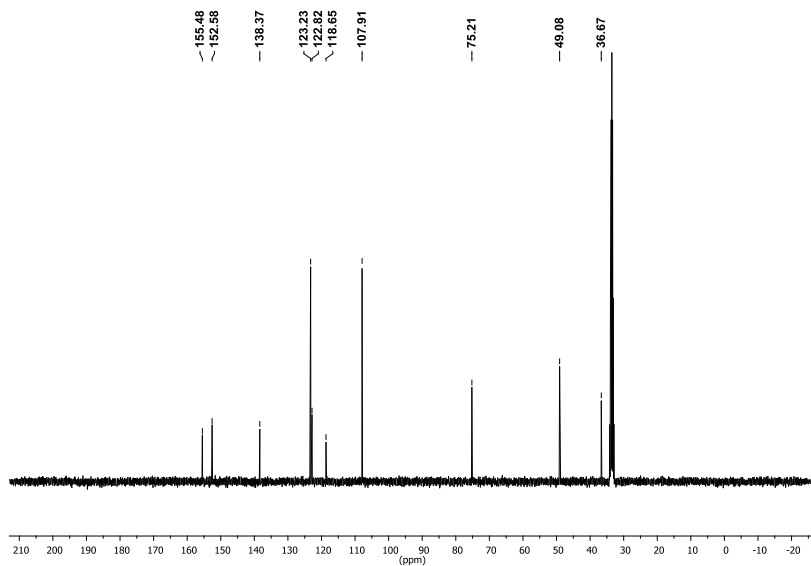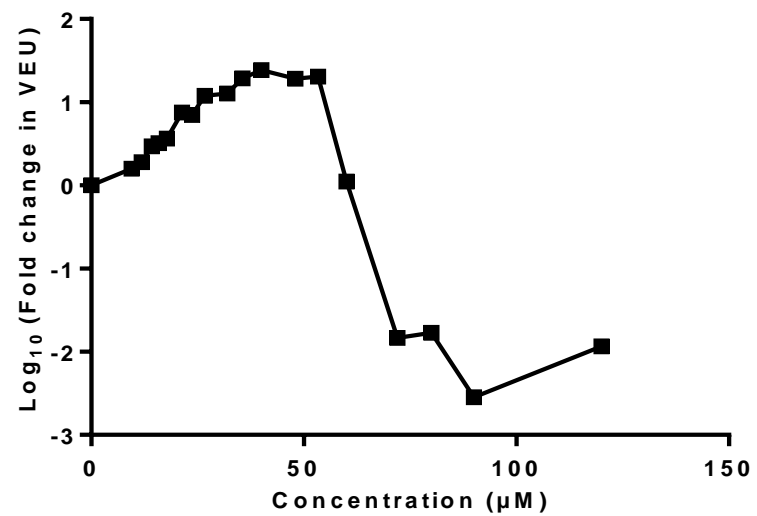

## Compound ID: 43

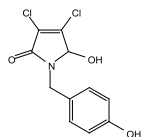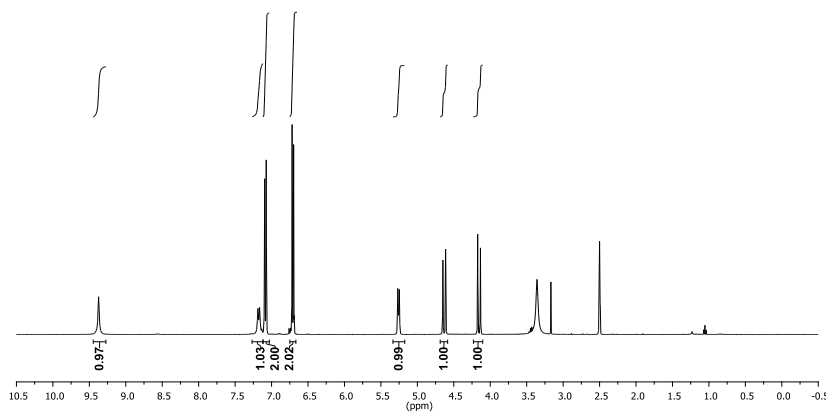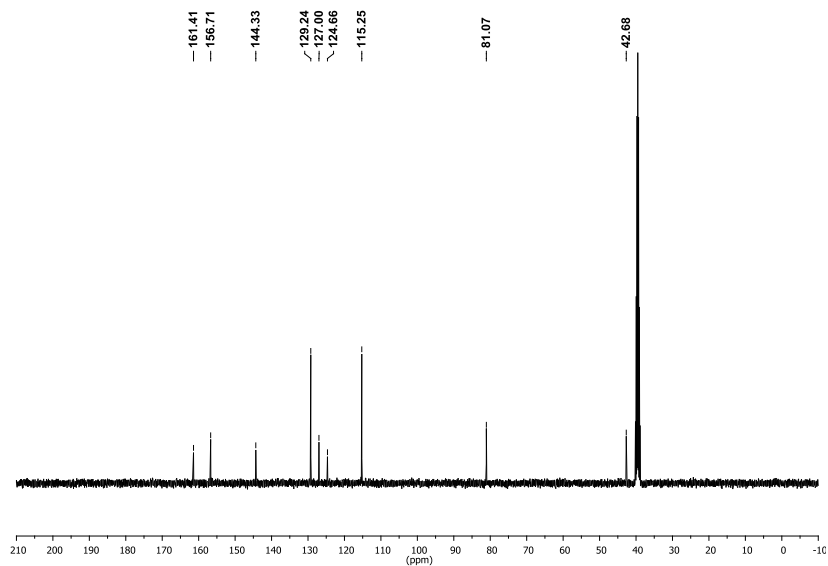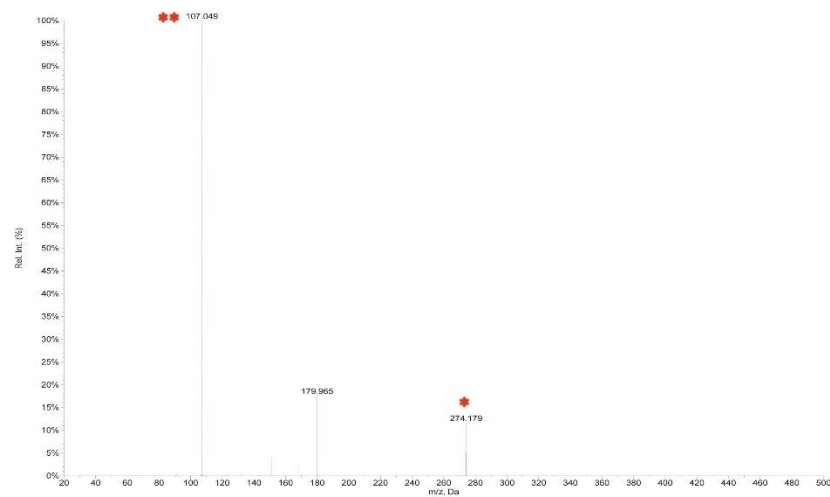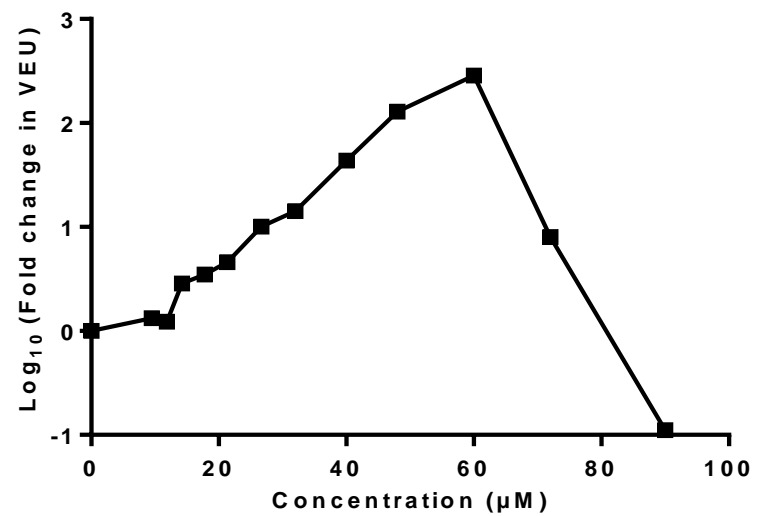

## Compound ID: 44

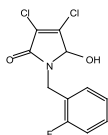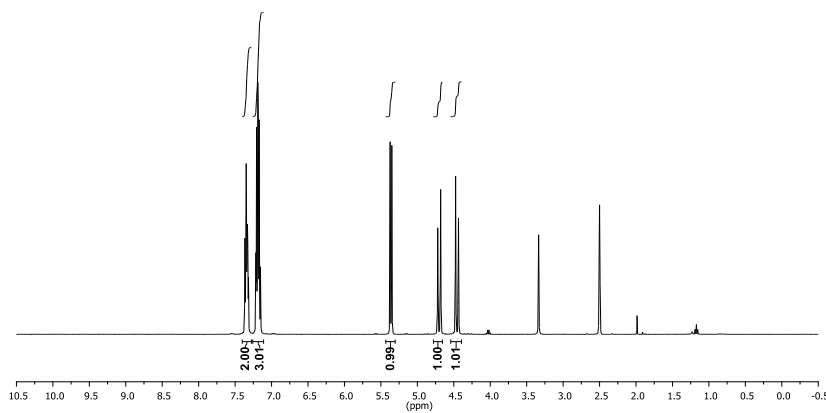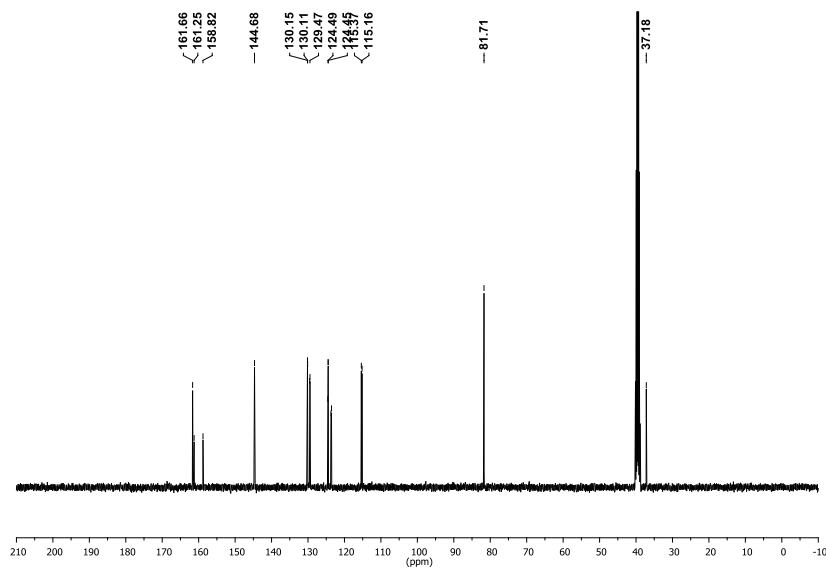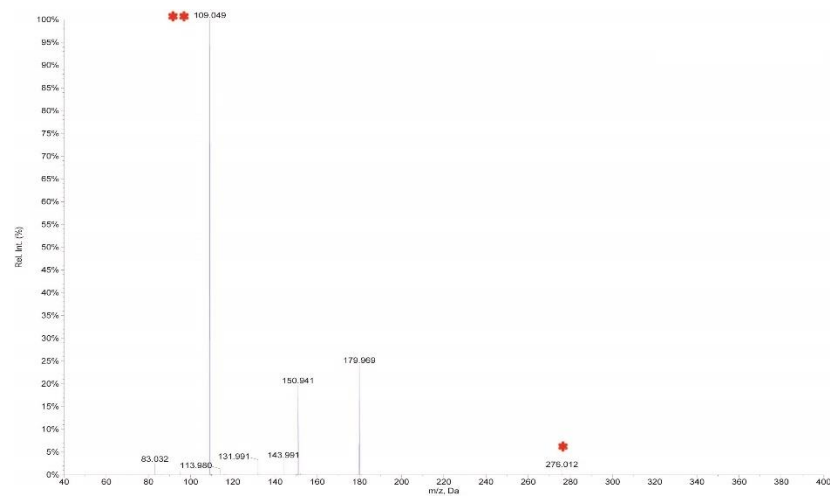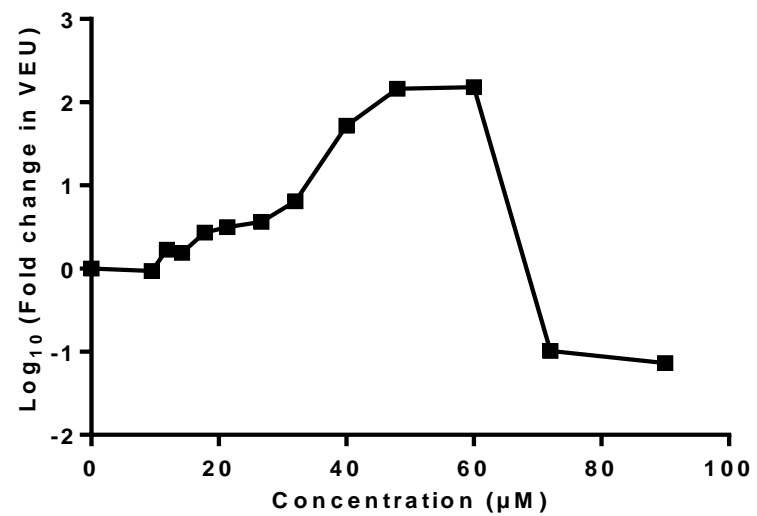

Compound ID: 45

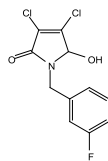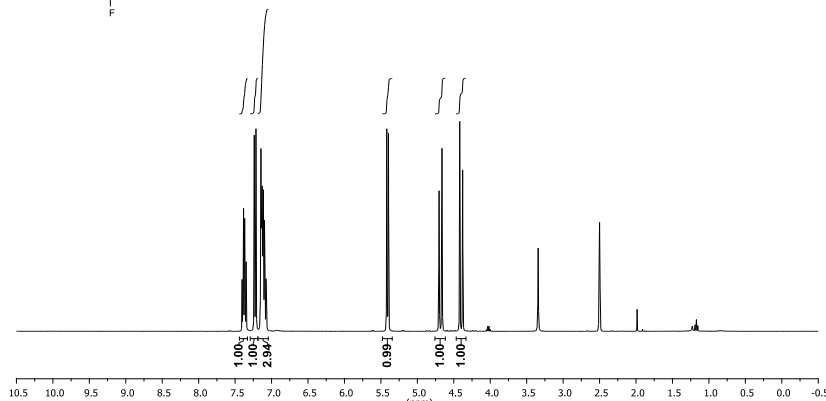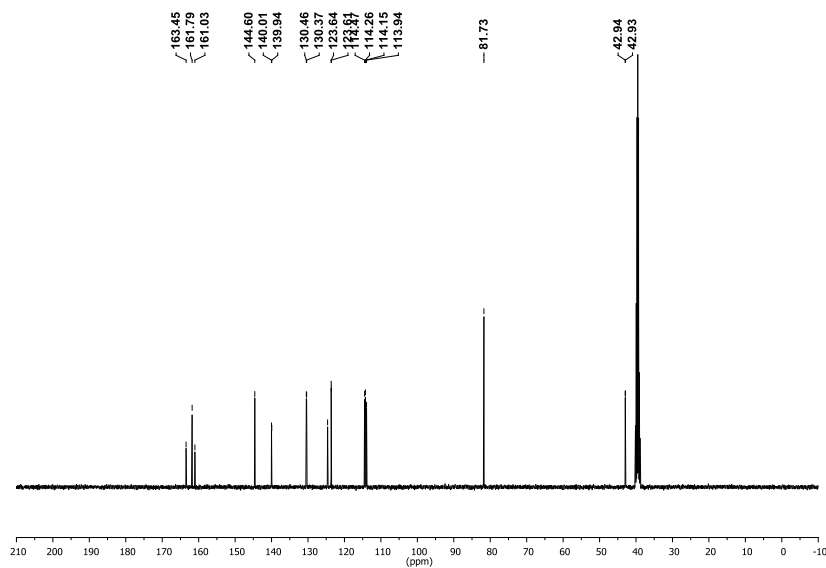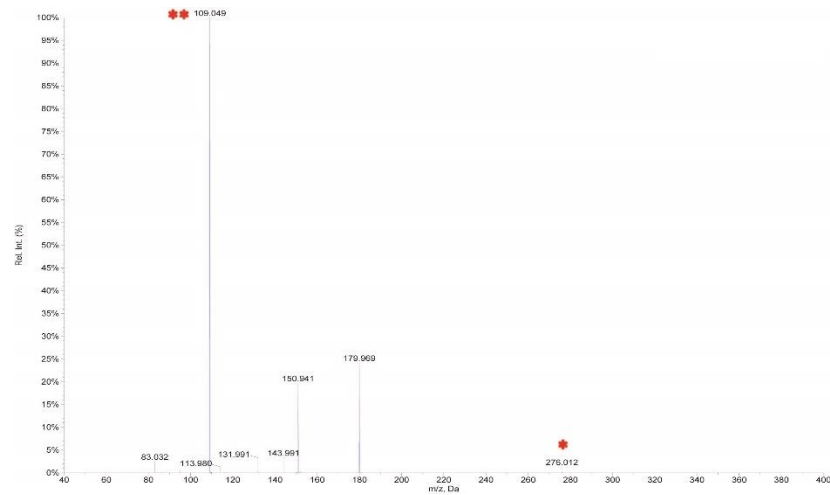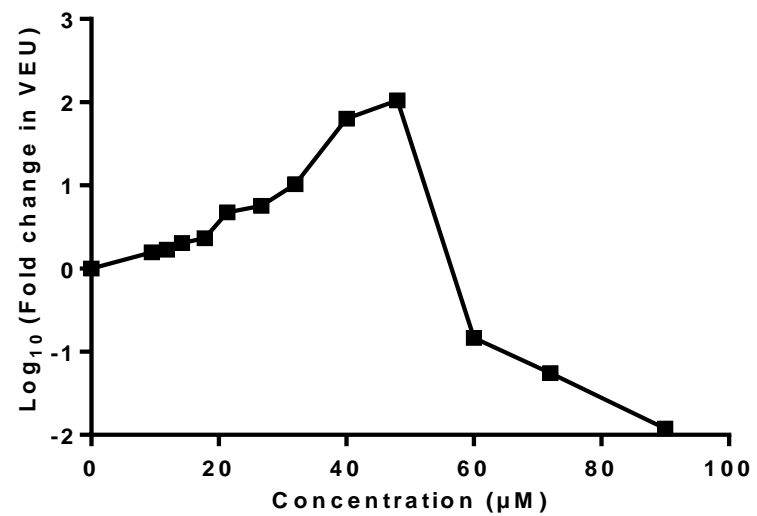



Compound ID: 46

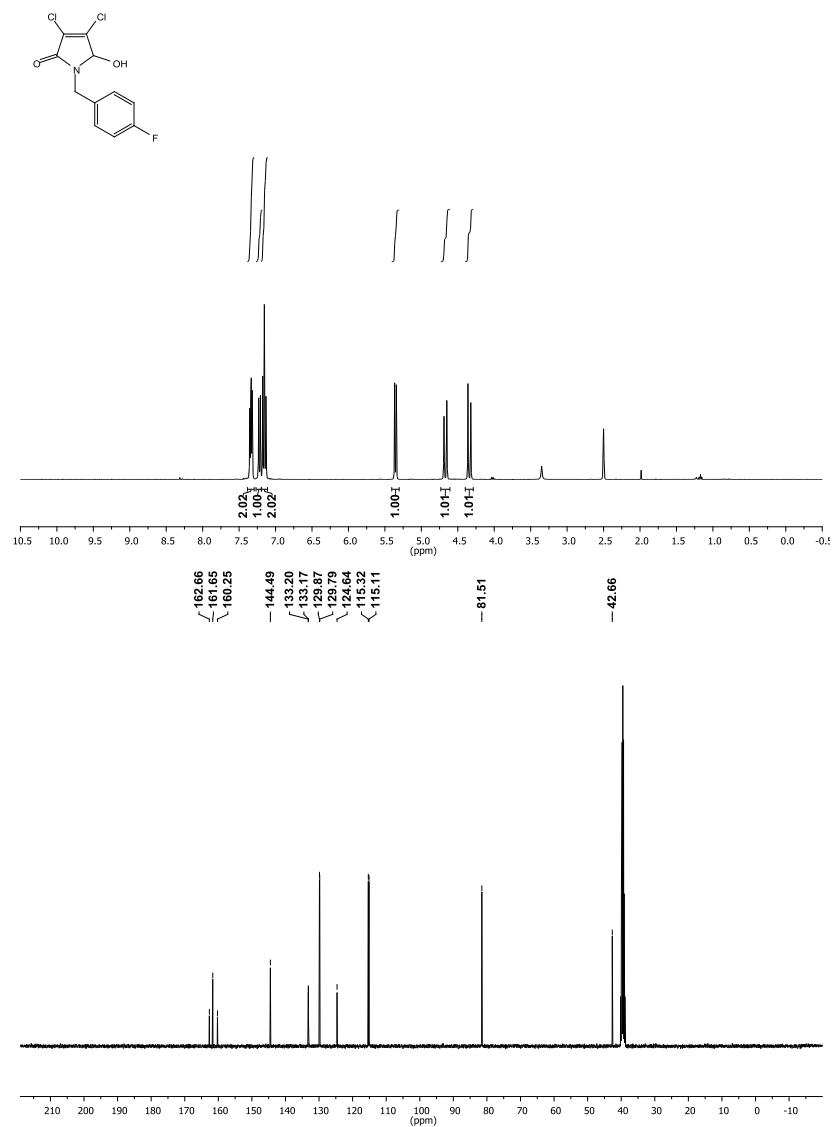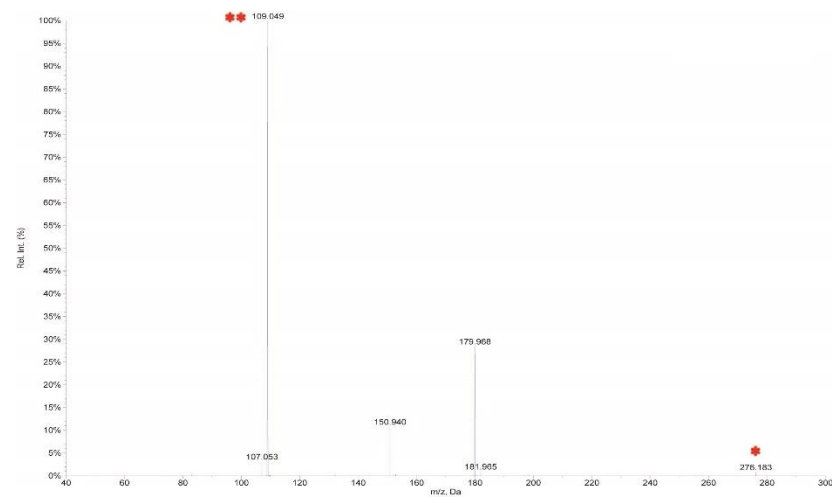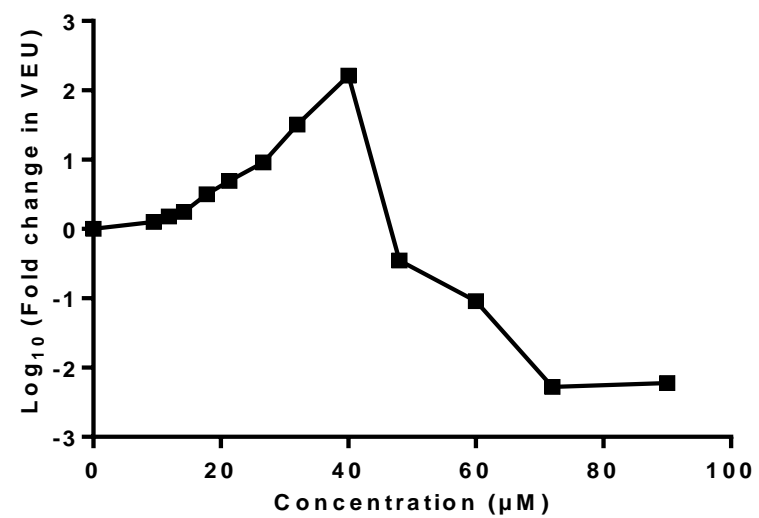

Compound ID: 47

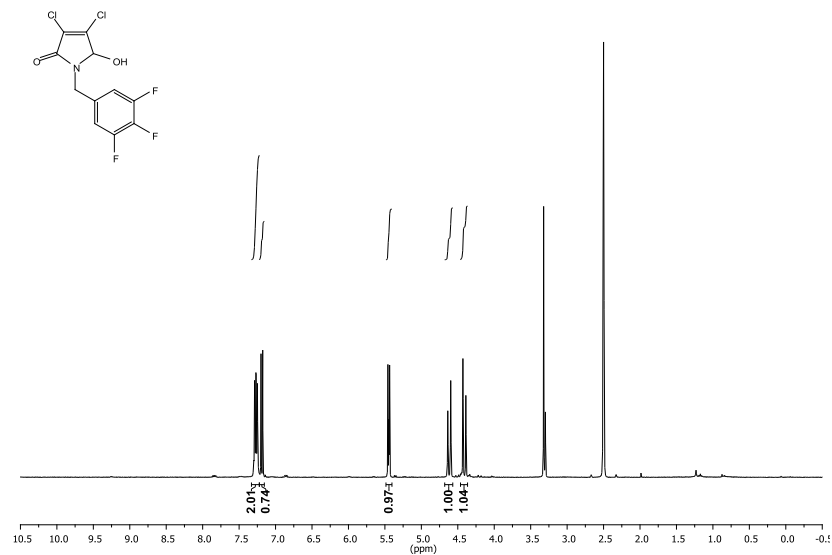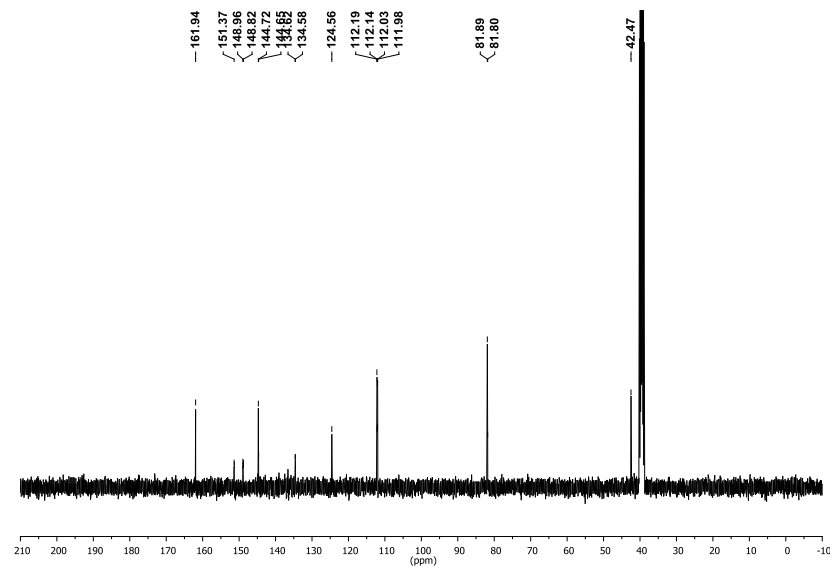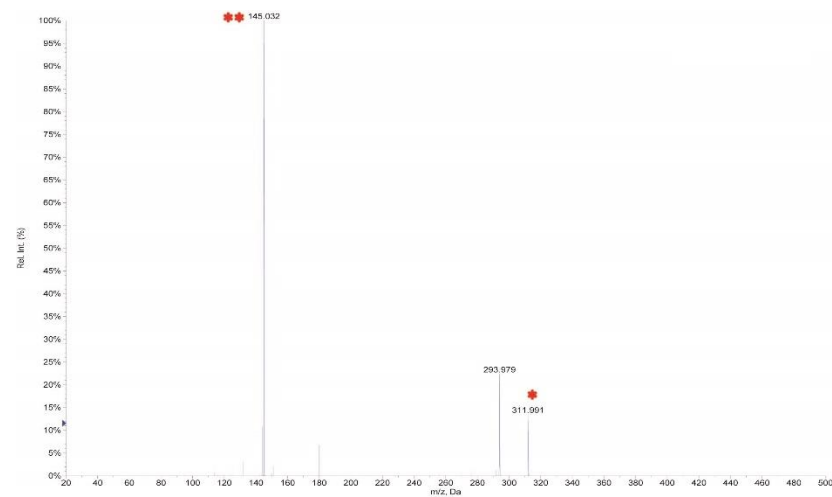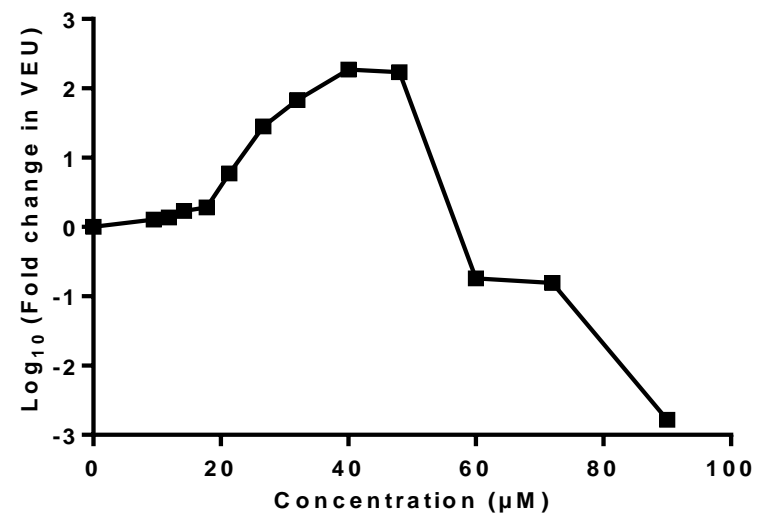

## Compound 48

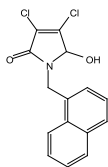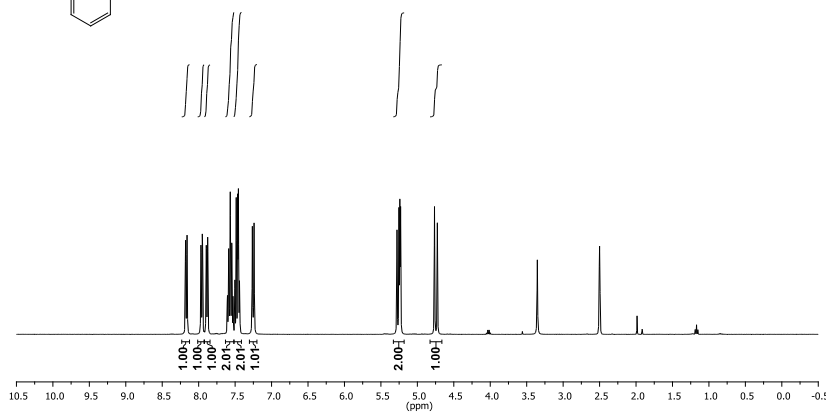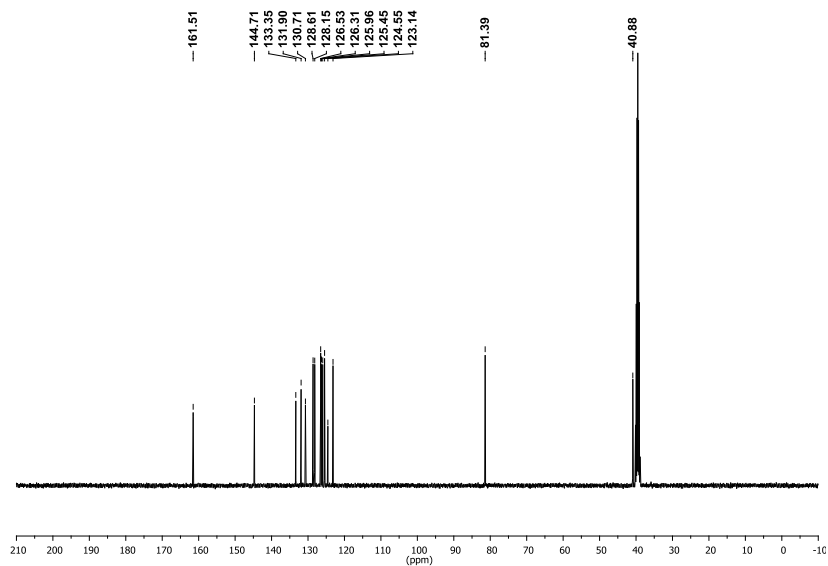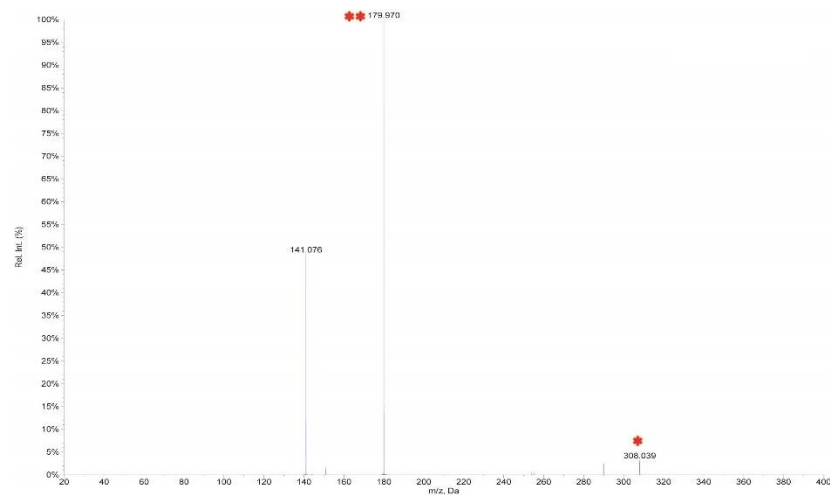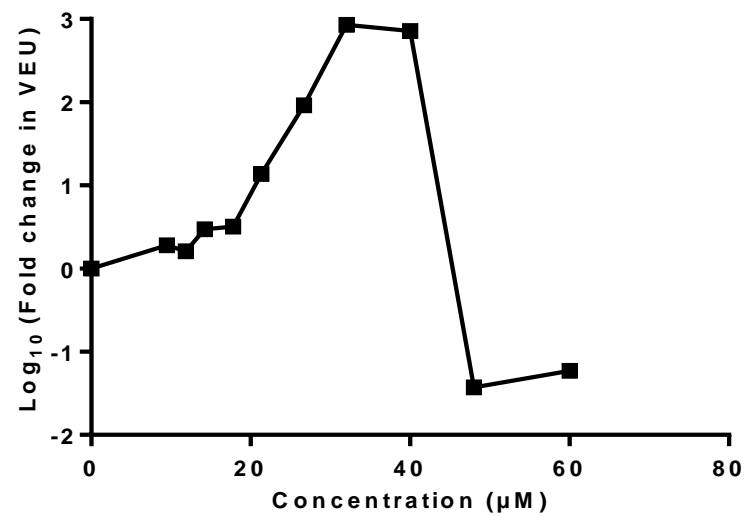

## Compound 49

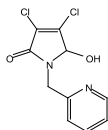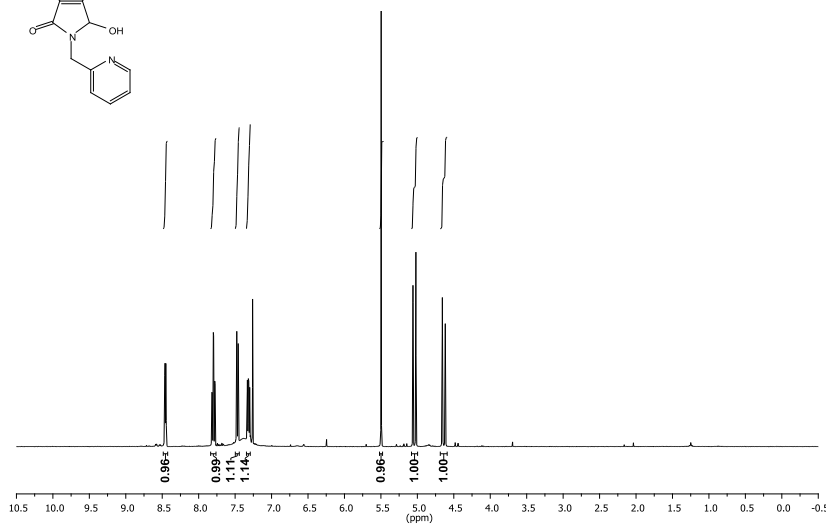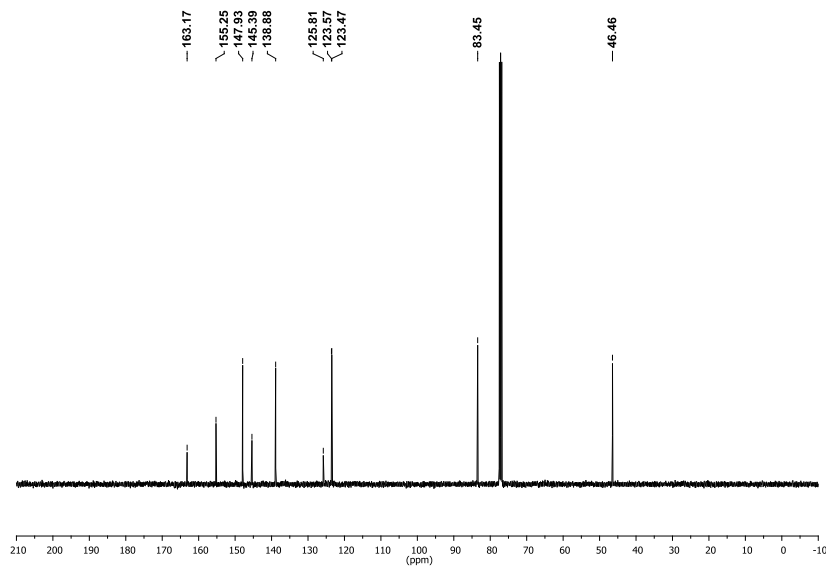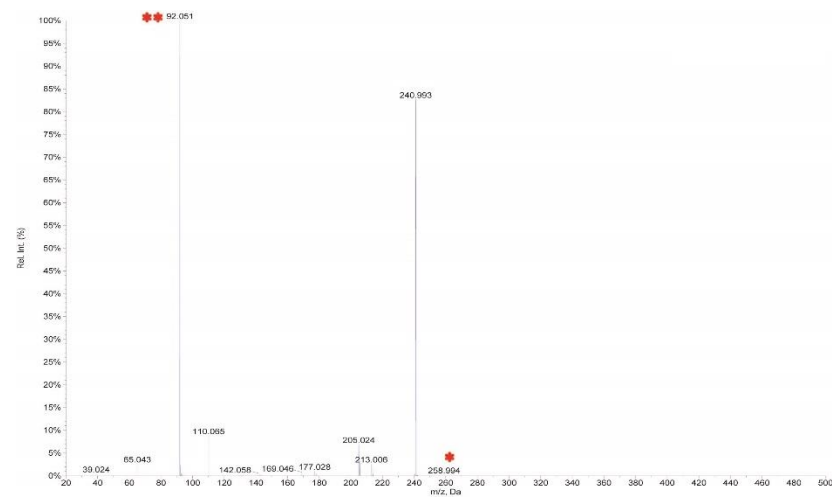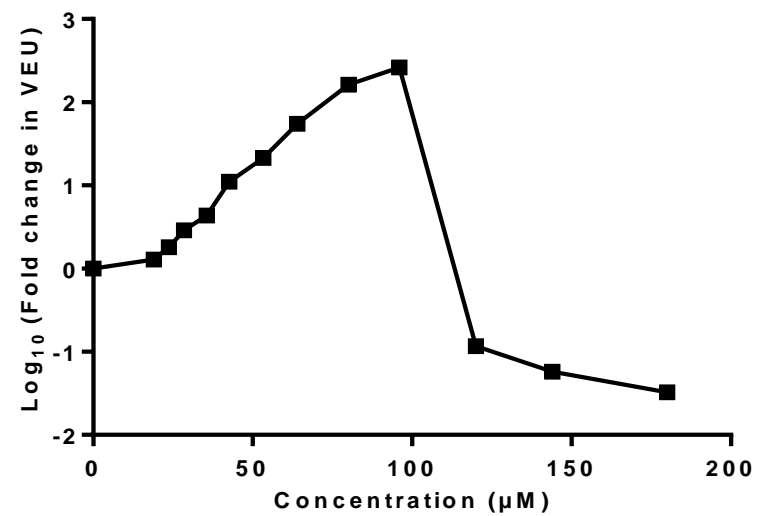

## Compound 50

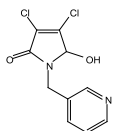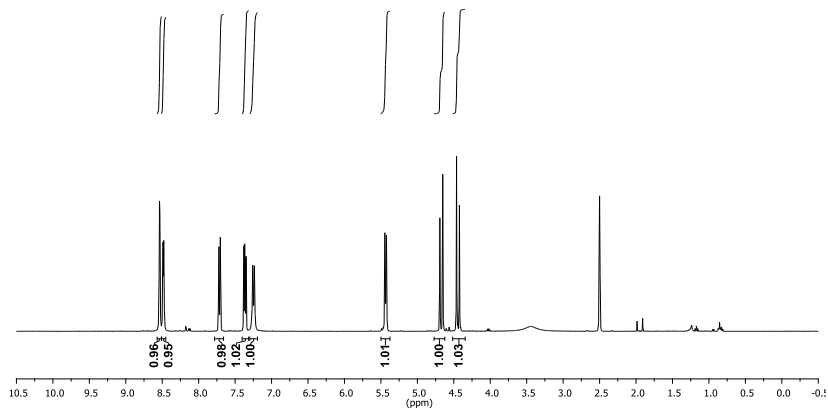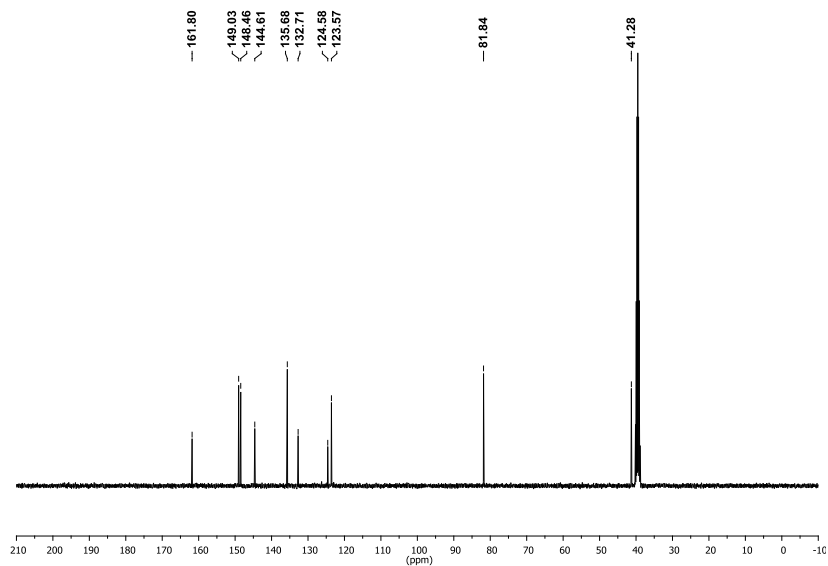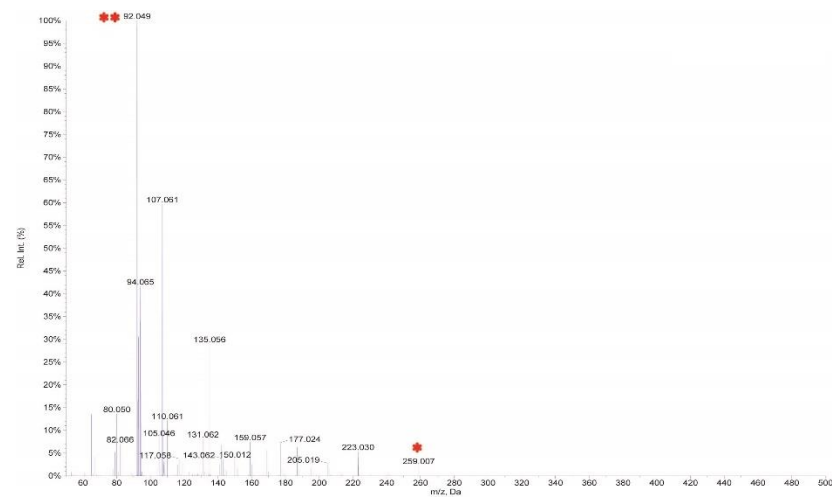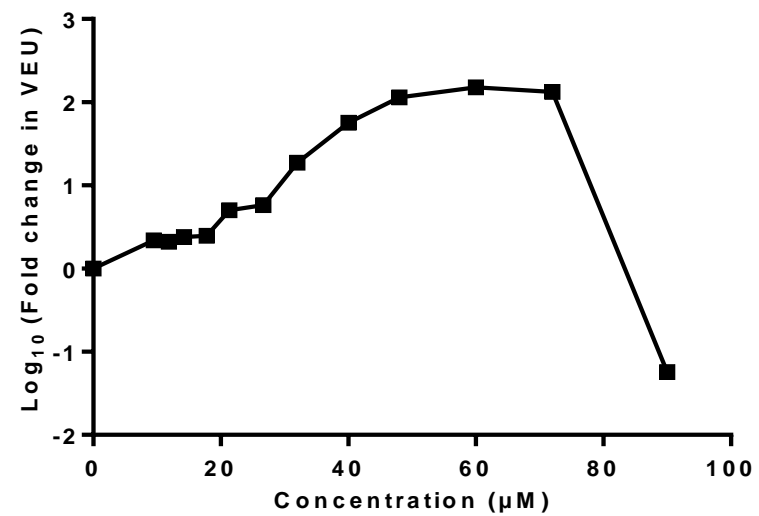

## Compound 51

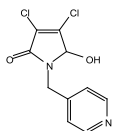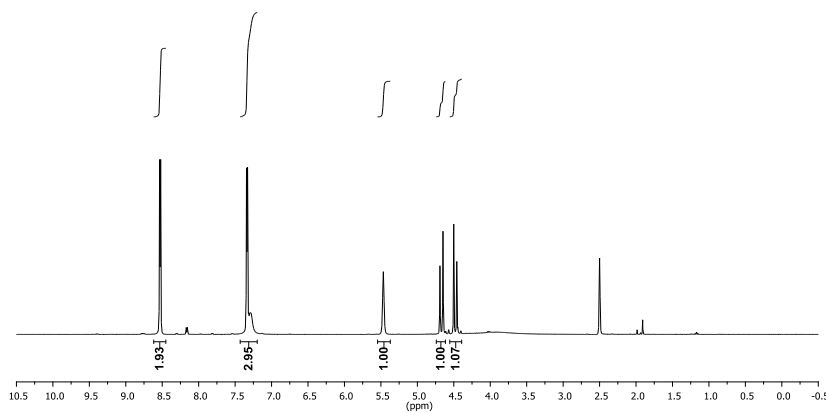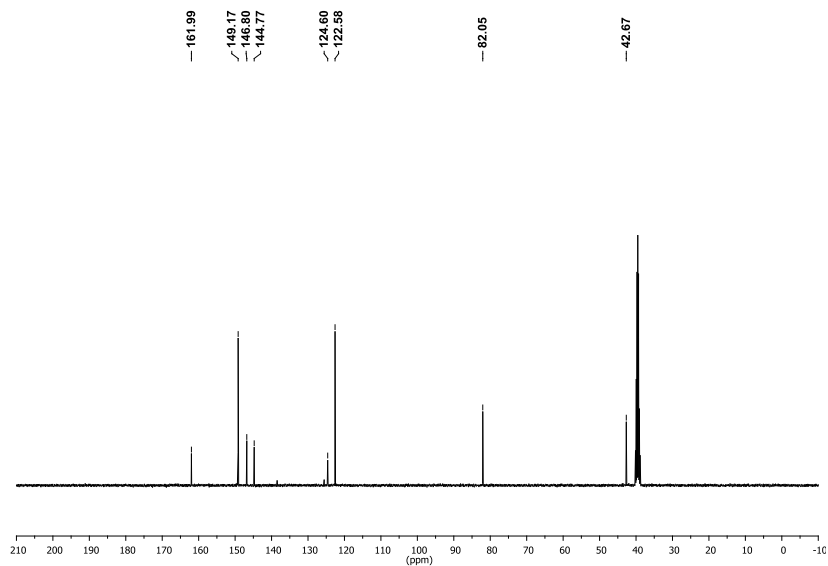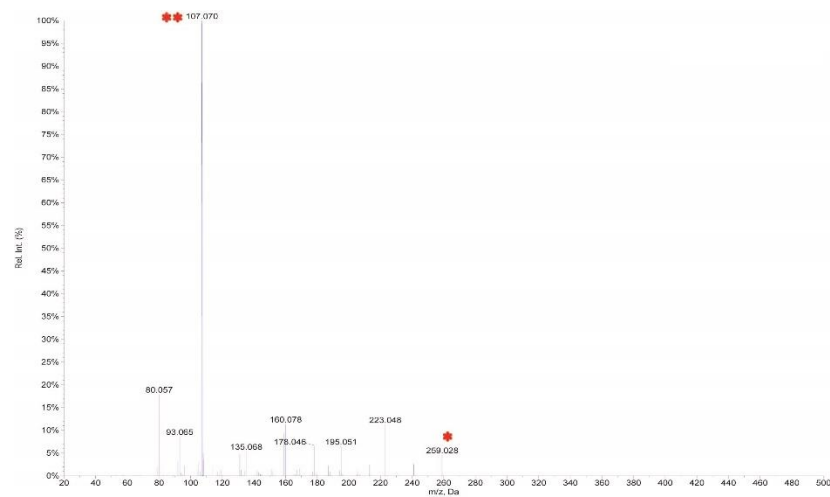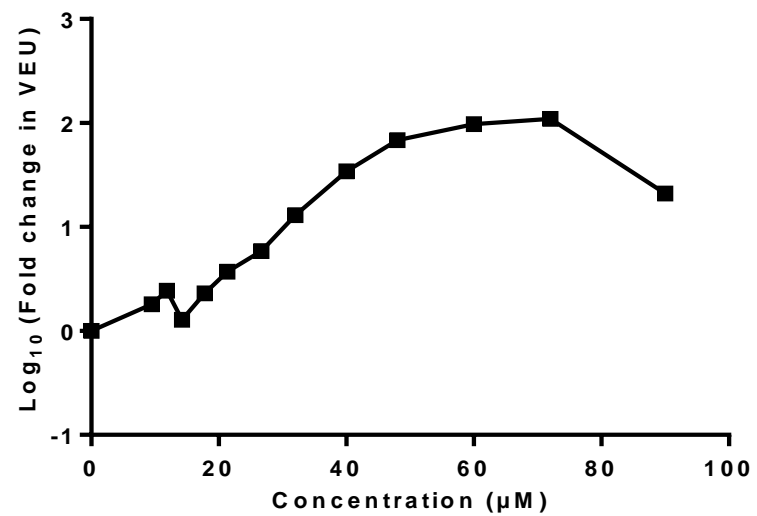

## MRM Transition Data

| Compound ID | Quantitative Transition |                    | Confirmatory Transition |                    | Collision Energy (eV) | LC-MRM Gradient |
|-------------|-------------------------|--------------------|-------------------------|--------------------|-----------------------|-----------------|
|             | Parent Ion (m/z)        | Fragment Ion (m/z) | Parent Ion (m/z)        | Fragment Ion (m/z) |                       |                 |
| 1           | 229.0                   | 163.0              | 231.0                   | 165.0              | 25                    | A               |
| 2           | 318.9                   | 209.0              | 318.9                   | 237.0              | 18                    | A               |
| 3           | 300.1                   | 193.0              | 302.1                   | 195.0              | 20                    | A               |
| 4           | 237.0                   | 209.0              | 239.0                   | 211.0              | 15                    | A               |
| 5           | 152.9                   | 61.0               | 152.9                   | 117.0              | 22                    | A               |
| 6           | 183.0                   | 150.9              | 185.0                   | 152.9              | 15                    | B               |
| 7           | 207.0                   | 150.9              | 209.0                   | 152.9              | 20                    | B               |
| 8           | 229.0                   | 165.0              | 229.0                   | 158.1              | 22                    | A               |
| 9           | 168.0                   | 132.0              | 170.0                   | 134.0              | 20                    | B               |
| 10          | 258.0                   | 91.1               | 260.0                   | 91.1               | 20                    | A               |
| 11          | 242.1                   | 91.1               | 244.1                   | 91.1               | 22                    | A               |
| 12          | 272.0                   | 91.1               | 274.0                   | 91.1               | 20                    | A               |
| 13          | 300.0                   | 91.1               | 300.0                   | 258.0              | 20                    | A               |
| 14          | 256.0                   | 91.1               | 256.0                   | 178.0              | 17                    | B               |
| 15          | 334.1                   | 227.0              | 336.1                   | 229.0              | 20                    | A               |
| 16          | 190.1                   | 91.1               | 190.1                   | 112.0              | 18                    | B               |
| 17          | 218.1                   | 91.1               | 218.1                   | 140.1              | 22                    | B               |
| 18          | 248.0                   | 180.0              | 250.0                   | 182.0              | 18                    | B               |
| 19          | 264.0                   | 180.0              | 266.0                   | 182.0              | 17                    | A               |
| 20          | 240.1                   | 91.1               | 240.1                   | 133.0              | 27                    | A               |
| 21          | 341.1                   | 323.1              | 343.1                   | 325.1              | 15                    | B               |
| 22          | 182.0                   | 146.0              | 184.0                   | 148.0              | 25                    | A               |
| 23          | ND*                     |                    |                         |                    |                       |                 |
| 24          | 210.0                   | 132.0              | 212.0                   | 134.0              | 20                    | B               |
| 25          | 208.0                   | 150.9              | 210.0                   | 152.9              | 23                    | A               |
| 26          | 208.0                   | 150.9              | 210.0                   | 152.9              | 23                    | A               |
| 27          | 206.0                   | 134.0              | 208.0                   | 134.0              | 23                    | A               |
| 28          | 281.1                   | 178.0              | 283.0                   | 180.0              | 25                    | C               |
| 29          | 272.1                   | 105.1              | 274.1                   | 105.1              | 25                    | A               |
| 30          | 286.1                   | 164.0              | 286.1                   | 117.1              | 20                    | A               |
| 31          | 300.1                   | 131.1              | 302.1                   | 131.1              | 23                    | A               |
| 32          | ND*                     |                    |                         |                    |                       |                 |
| 33          | 282.0                   | 133.1              | 284.0                   | 133.1              | 20                    | A               |
| 34          | 272.0                   | 105.1              | 272.0                   | 168.0              | 25                    | A               |
| 35          | 334.0                   | 167.1              | 336.0                   | 167.1              | 25                    | A               |
| 36          | 288.0                   | 121.1              | 290.0                   | 121.1              | 18                    | A               |
| 37          | 274.0                   | 107.1              | 276.0                   | 107.1              | 30                    | B               |
| 38          | 292.0                   | 125.0              | 294.0                   | 125.0              | 22                    | A               |
| 39          | 336.0                   | 169.0              | 338.0                   | 169.0              | 22                    | A               |

|    |       |       |       |       |    |   |
|----|-------|-------|-------|-------|----|---|
| 40 | 326.0 | 159.0 | 328.0 | 159.0 | 25 | A |
| 41 | 272.0 | 105.1 | 274.0 | 105.1 | 20 | A |
| 42 | 288.0 | 121.1 | 290.0 | 121.1 | 17 | A |
| 43 | 274.0 | 107.1 | 276.0 | 107.1 | 20 | A |
| 44 | 276.0 | 109.1 | 278.0 | 109.1 | 22 | A |
| 45 | 276.0 | 109.1 | 276.0 | 258.0 | 20 | A |
| 46 | 276.0 | 109.1 | 278.0 | 109.1 | 22 | A |
| 47 | 312.0 | 145.0 | 312.0 | 294.0 | 18 | B |
| 48 | 308.0 | 180.0 | 310.0 | 182.0 | 17 | A |
| 49 | 259.0 | 241.0 | 261.0 | 243.0 | 20 | B |
| 50 | 259.0 | 92.1  | 261.0 | 92.1  | 35 | A |
| 51 | 259.0 | 107.1 | 261.0 | 107.1 | 32 | B |

\* - compound not analyzed

LC-MRM Gradient A:

| Retention Time (min) | Flow Rate ( $\mu\text{L}/\text{min}$ ) | Water (0.1% formic acid) (%) | Acetonitrile (0.1% formic acid) (%) |
|----------------------|----------------------------------------|------------------------------|-------------------------------------|
| 0                    | 250                                    | 98                           | 2                                   |
| 5                    | 250                                    | 50                           | 50                                  |
| 5.5                  | 275                                    | 20                           | 80                                  |
| 10                   | 350                                    | 0                            | 100                                 |

LC-MRM Gradient B:

| Retention Time (min) | Flow Rate ( $\mu\text{L}/\text{min}$ ) | Water (0.1% formic acid) (%) | Acetonitrile (0.1% formic acid) (%) |
|----------------------|----------------------------------------|------------------------------|-------------------------------------|
| 0                    | 250                                    | 98                           | 2                                   |
| 2                    | 250                                    | 50                           | 50                                  |
| 5.5                  | 275                                    | 20                           | 80                                  |
| 10                   | 350                                    | 0                            | 100                                 |



## LC-MRM Gradient C

| Retention Time<br>(min) | Flow Rate<br>( $\mu\text{L}/\text{min}$ ) | Water (0.1% formic<br>acid) (%) | Acetonitrile (0.1%<br>formic acid) (%) |
|-------------------------|-------------------------------------------|---------------------------------|----------------------------------------|
| 0                       | 320                                       | 100                             | 0                                      |
| 4.1                     | 325                                       | 75                              | 25                                     |
| 7.8                     | 375                                       | 50                              | 50                                     |
| 9.7                     | 425                                       | 25                              | 75                                     |
| 11.6                    | 450                                       | 0                               | 100                                    |

## References

1. Bellina, F., Anselmi, C., Martina, F. & Rossi, R. Mucochloric acid: a useful synthon for the selective synthesis of 4-aryl-3-chloro-2(5H)-furanones, (Z)-4-aryl-5-[1-(aryl)methylidene]-3-chloro-2(5H)-furanones and 3,4-diaryl-2(5H)-furanones. *Eur. J. Org. Chem.* **2003**, 2290–2302 (2003).
2. Ratts, K. W. & Phillips, W. G. Trimethyl Phosphite Displacement on Mucochloryl Chloride. *J. Org. Chem.* **39**, 3300–3301 (1974).
3. Zhang, J., Blazecka, P. G. & Davidson, J. G. First direct reductive amination of mucochloric acid: A simple and efficient method for preparing highly functionalized  $\alpha,\beta$ -unsaturated  $\gamma$ -butyrolactams. *Org. Lett.* **5**, 553–556 (2003).
4. Holz, J. *et al.* A highly tunable family of chiral bisphospholanes for Rh-catalyzed enantioselective hydrogenation reactions. *Chem. - A Eur. J.* **12**, 5001–5013 (2006).
5. Yamashita, S., Mase, N. & Takabe, K. Chemoenzymatic total synthesis and determination of the absolute configuration of (S)-nebracetam. *Tetrahedron Asymmetry* **19**, 2115–2118 (2008).
